# Supplementary material for: Fast, highly enantioselective, and sustainable fluorination of 4-substituted pyrazolones catalyzed by amide-based phase-transfer catalysts
Source: Royal Society of Chemistry journal article supplement (doi:10.1039/d3qo00269a), 2023-01-01

---

# Fast, highly enantioselective and sustainable fluorination of 4-substituted pyrazolones catalyzed by hybrid amide-based phase transfer catalysts

Yakun Wang,<sup>\*a</sup> Shuaifei Wang,<sup>a</sup> Yufeng Wu,<sup>b</sup> Ting Zhao,<sup>c</sup> Jie Liu,<sup>a</sup> Junlin Zheng,<sup>a</sup> Lin Wang,<sup>a</sup> Jieli Lv<sup>a</sup> and Tao Zhang <sup>\*a</sup>

<sup>a</sup>School of Pharmacy, Xinxiang Medical University, Xinxiang, Henan 453003, P.R. China. E-mail: [161072@xxmu.edu.cn](mailto:161072@xxmu.edu.cn), zhangtao126@163.com. Fax: (+86)-0373-3029879.

<sup>b</sup> School of Chemical Engineering, Dalian University of Technology, Dalian, Liaoning 116024, P.R. China.

<sup>c</sup> School of Pharmacy, Shenyang Pharmaceutical University, Shenyang, Liaoning 117004, P.R. China.

|                                                                                                      |               |
|------------------------------------------------------------------------------------------------------|---------------|
| <b>1. General Information</b> .....                                                                  | <b>2-3</b>    |
| <b>1.1 4-Substituted pyrazolones</b> .....                                                           | <b>2</b>      |
| <b>1.2 Phase transfer catalysts</b> .....                                                            | <b>2-12</b>   |
| <b>1.3 Commercial grade reagents and solvents</b> .....                                              | <b>12</b>     |
| <b>2. General procedure for the enantioselective fluorination of 4-substituted pyrazolones</b> ..... | <b>13</b>     |
| <b>2.1 Optimization of reaction parameters for the asymmetric fluorination</b> ....                  | <b>13-16</b>  |
| <b>2.2 Multigram synthesis of fluoride product 2aa using subsequent fluorinations</b> .....          | <b>17-21</b>  |
| <b>3. Experimental procedures and characterization of products</b> .....                             | <b>22</b>     |
| <b>3.1 Achiral fluorination of pyrazolones</b> .....                                                 | <b>22</b>     |
| <b>3.2 Chiral fluorination of pyrazolones</b> .....                                                  | <b>22-57</b>  |
| <b>3.3 Crystallographic data</b> .....                                                               | <b>58-61</b>  |
| <b>4. Computation details</b> .....                                                                  | <b>62-67</b>  |
| <b>5. NMR spectra for compounds</b> .....                                                            | <b>68</b>     |
| <b>5.1 NMR spectra for catalysts</b> .....                                                           | <b>68-86</b>  |
| <b>5.2 NMR spectra for fluorination products</b> .....                                               | <b>87-124</b> |

---

## 1. General Information:

Unless otherwise stated, all commercial reagents and solvents were used without further additional purification. Analytical TLC was visualized with UV light at 254 nm. Thin layer chromatography was carried out on TLC aluminum sheets with silica gel 60 F<sub>254</sub>. Purification of reaction products was carried out with chromatography on silica gel 60 (200-300 mesh). <sup>1</sup>H NMR (400 MHz) spectra was obtained at 25 °C; <sup>13</sup>C NMR (126 MHz) and <sup>19</sup>F NMR (376 MHz) were recorded on a VARIAN INOVA-400M and AVANCE II 400 spectrometer at 25 °C. Chemical shifts are reported as  $\delta$  (ppm) values relative to TMS as internal standard and coupling constants (J) in Hz. The enantiomeric excesses (*ee*) were determined by HPLC. HPLC analyses were performed on equipped with Diacel Chiralpak AD-H, AS or OJ-H chiral column (0.46 cm  $\times$  25 cm), using mixtures of *n*-hexane/isopropyl alcohol as mobile phase, at 25 °C. Mass spectra are reported by using electron ionization and electrospray ionization techniques. Melting points were determined with a hot plate apparatus. Optical rotations were measured on a digital polarimeter with a sodium lamp at 25 °C.

### 1.1 4-Substituted pyrazolones

4-Substituted pyrazolones **1a-1ai** were prepared from acetophenone and  $\beta$ -keto esters according to the literature: (*Adv. Synth. Catal.*, **2010**, 352, 827; *Angew. Chem., Int. Ed.*, **2011**, 50, 4928. *Adv. Synth. Catal.*, **2016**, 358, 3971.)

### 1.2 Phase transfer catalysts

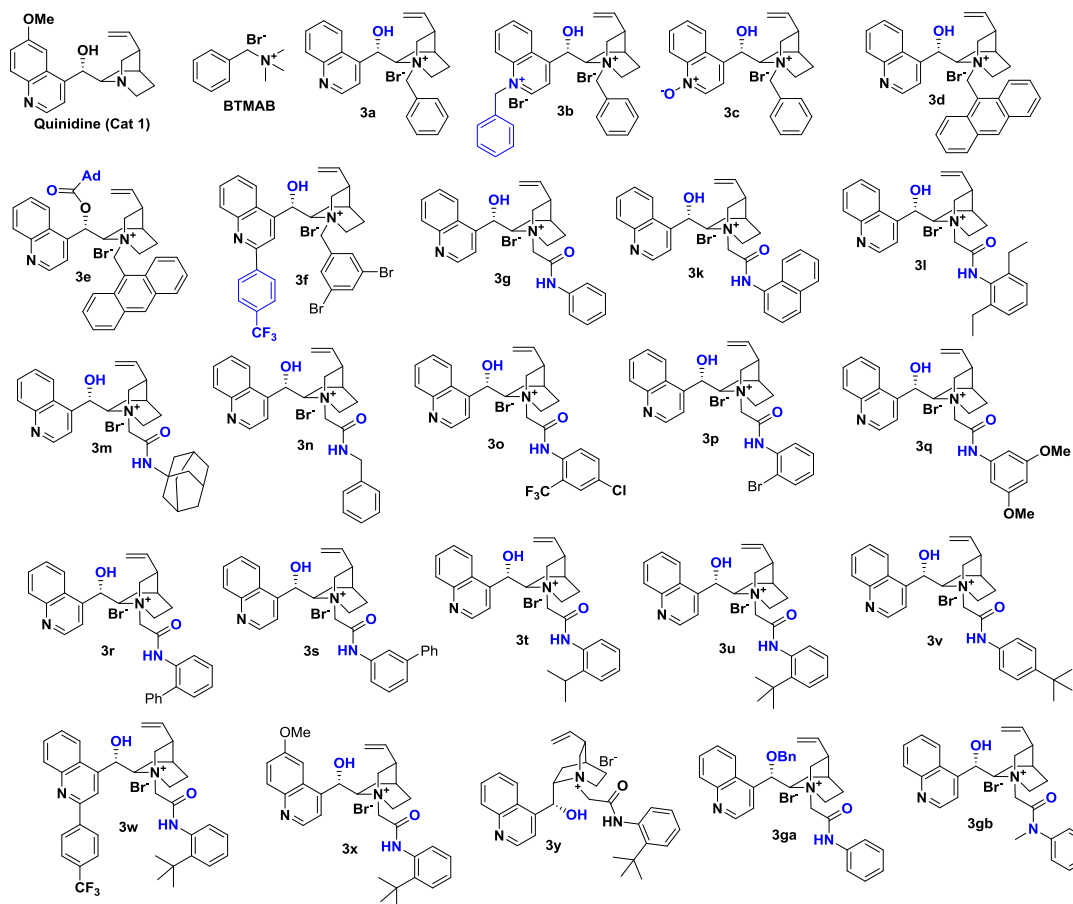

Quinidine (**Cat 1**), BTMAB were purchased from **Innochem**. Phase transfer catalysts **3b-3f** were easily prepared according to the previous papers (*Angew. Chem. Int. Ed.*, 2014, **126**, 8375; *J. Org. Chem.* **2016**, *81*, 7042; *Green Chem.*, 2016, **18**, 5493).

### Synthesis of $\alpha$ -bromoamides **S1-S16**

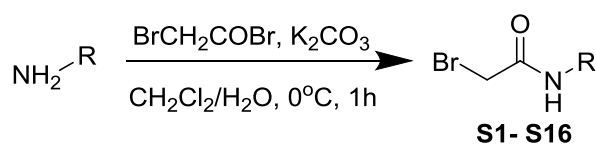

$\alpha$ -bromoamides **S1-S16** were prepared according to the previous papers (*Org. Lett.* **2019**, *21*, 8085; *Org. Lett.* **2020**, *22*, 8687).

To the solution of corresponding amine (5 mmol) in DCM (10 mL) the aqueous (20 mL) solution of  $\text{K}_2\text{CO}_3$  (1.1 g, 7.5 mmol) was added. Subsequently the mixture was cooled to  $0^\circ\text{C}$  and the solution of bromoacetyl bromide (0.6 mL, 7.5 mmol) in DCM (3 mL) was added dropwise. The reaction was controlled using TLC for about 1h. Then the phases were separated and the aqueous phase was extracted with DCM (3 x 15 mL). The combined

organic phases were dried over anhydrous  $\text{Na}_2\text{SO}_4$  and then evaporated under *vacuum*. **S1-S16** were prepared according to the procedure without further purification.

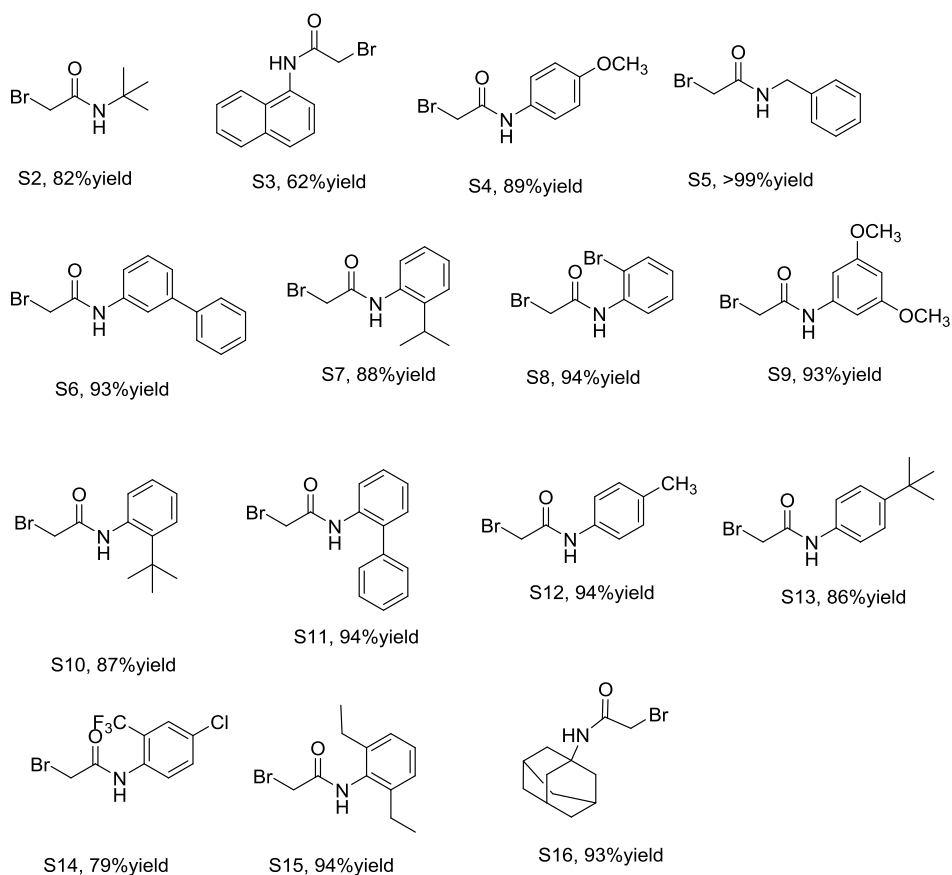

### Synthesis of hybrid amide-based PTC **3g – 3v**

Hybrid amide-based PTC **3g – 3v** were prepared according to the previous papers (*Org. Lett.* **2019**, *21*, 8085; *Org. Lett.* **2020**, *22*, 8687).

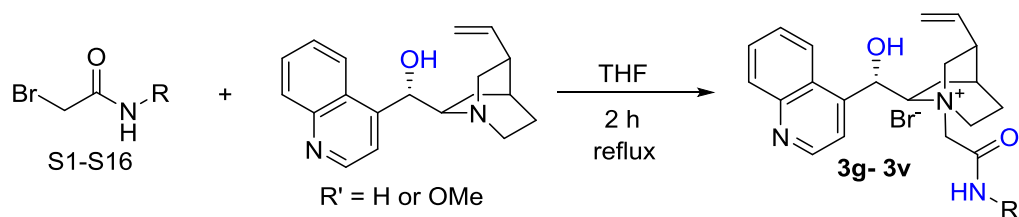

To the solution of cinchonine (1.0 g, 3.4 mmol) in THF (30 mL) the corresponding amide (3.4 mmol) was added. The mixture was refluxed for 2h and the reaction was controlled using TLC. Subsequently the solvent was evaporated under *vacuum* and the solid residue was dissolved in DCM (2 mL). The solution of crude catalyst was added dropwise to diethyl ether (15 mL). Then the precipitate was filtered, washed with diethyl ether (10 mL) and dried. Catalysts **3g-3v** were obtained in a form of solids.

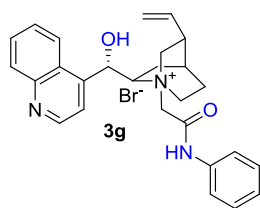

White solid (89% yield). m.p. 196-198 °C;  $[\alpha]_D^{25} +42.0$  (*c* 0.20, CHCl<sub>3</sub>); <sup>1</sup>H NMR (400 MHz, DMSO-*d*<sub>6</sub>)  $\delta$  11.04 (d, *J* = 5.5 Hz, 1H), 8.98 (d, *J* = 4.5 Hz, 1H), 8.25 – 8.02 (m, 2H), 7.87 – 7.70 (m, 4H), 7.60 (ddd, *J* = 8.4, 6.8, 1.4 Hz, 1H), 7.50 – 7.38 (m, 2H), 7.21 (td, *J* = 7.4, 1.2 Hz, 1H), 6.79 (dd, *J* = 15.5, 3.4 Hz, 1H), 6.21 – 5.91 (m, 2H), 5.37 – 5.13 (m, 2H), 4.80 (dd, *J* = 16.1, 12.1 Hz, 1H), 4.66 (d, *J* = 15.9 Hz, 1H), 4.51 – 4.15 (m, 3H), 3.96 – 3.83 (m, 1H), 3.76 – 3.59 (m, 1H), 2.87 (q, *J* = 8.7 Hz, 1H), 2.23 (t, *J* = 11.9 Hz, 1H), 2.02 – 1.85 (m, 3H), 1.20 – 0.98 (m, 1H). <sup>13</sup>C NMR (101 MHz, DMSO-*d*<sub>6</sub>)  $\delta$  163.22, 150.65, 148.05, 145.14, 138.24, 137.06, 130.39, 129.89, 129.62, 127.51, 125.14, 124.83, 123.60, 120.63, 120.10, 117.68, 66.01, 65.19, 59.70, 59.59, 57.60, 37.58, 26.62, 23.39, 20.59, 11.76. HRMS Calcd. For [C<sub>27</sub>H<sub>30</sub>N<sub>3</sub>O<sub>2</sub>]<sup>+</sup> requires *m/z* 428.2333, found *m/z* 428.2337.

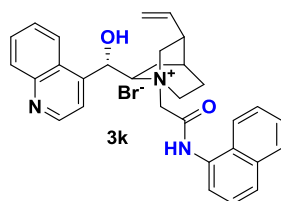

White solid (96% yield). m.p. 88-92 °C;  $[\alpha]_D^{25} +92.5$  (*c* 0.20, CHCl<sub>3</sub>); <sup>1</sup>H NMR (400 MHz, DMSO-*d*<sub>6</sub>)  $\delta$  10.95 (d, *J* = 5.5 Hz, 1H), 8.99 (d, *J* = 4.5 Hz, 1H), 8.32 – 8.13 (m, 2H), 8.10 – 7.69 (m, 6H), 7.68 – 7.49 (m, 3H), 7.41 (ddd, *J* = 8.4, 6.8, 1.4 Hz, 1H), 6.90 (d, *J* = 3.5 Hz, 1H), 6.20 (q, *J* = 6.5, 4.8 Hz, 1H), 6.05 (ddd, *J* = 17.2, 10.2, 6.7 Hz, 1H), 5.38 – 5.21 (m, 2H), 5.06 (d, *J* = 15.9 Hz, 1H), 4.84 (dd, *J* = 16.1, 12.1 Hz, 1H), 4.58 – 4.21 (m, 3H), 3.98 (t, *J* = 11.4 Hz, 1H), 3.87 – 3.70 (m, 1H), 3.65 – 3.52 (m, 2H), 2.98 – 2.82 (m, 1H), 2.24 (t, *J* = 11.9 Hz, 1H), 1.96 (d, *J* = 8.5 Hz, 3H), 1.87 – 1.68 (m, 2H), 1.06 (d, *J* = 8.8 Hz, 1H). <sup>13</sup>C NMR (101 MHz, DMSO-*d*<sub>6</sub>)  $\delta$  164.26, 150.65, 148.06, 145.24, 137.11, 134.24, 132.29, 130.32, 129.86, 128.77, 128.28, 127.43, 127.05, 126.84, 126.77, 126.05, 124.87, 123.70, 123.13, 122.91, 120.62, 117.67, 67.48, 66.11, 65.42, 59.57, 57.56, 37.60, 26.64, 25.60, 23.43, 20.68, 11.77. HRMS Calcd. For [C<sub>31</sub>H<sub>32</sub>N<sub>3</sub>O<sub>2</sub>]<sup>+</sup> requires *m/z* 478.2489, found *m/z* 478.2492.

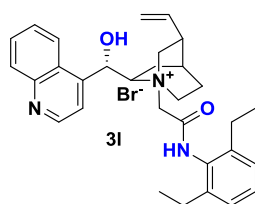

Light yellow solid (94% yield), m.p. 213-215 °C;  $[\alpha]_{\text{D}}^{25} +74.5$  (*c* 0.20,  $\text{CHCl}_3$ );  $^1\text{H}$  NMR (400 MHz,  $\text{DMSO-}d_6$ )  $\delta$  10.38 (q, *J* = 4.8, 3.6 Hz, 1H), 8.99 (d, *J* = 4.5 Hz, 1H), 8.27 (d, *J* = 8.5 Hz, 1H), 8.08 (d, *J* = 8.4 Hz, 1H), 7.93 – 7.66 (m, 2H), 7.52 (t, *J* = 7.7 Hz, 1H), 7.30 (t, *J* = 7.6 Hz, 1H), 7.19 (d, *J* = 7.6 Hz, 2H), 6.95 (dd, *J* = 16.5, 3.9 Hz, 1H), 6.20 – 5.95 (m, 2H), 5.29 (dd, *J* = 14.1, 3.3 Hz, 2H), 5.04 (s, 1H), 4.76 (d, *J* = 15.6 Hz, 1H), 4.52 – 4.31 (m, 2H), 4.16 (t, *J* = 11.5 Hz, 1H), 3.97 (t, *J* = 11.7 Hz, 1H), 3.78 (q, *J* = 15.5, 12.4 Hz, 1H), 2.86 (q, *J* = 8.9 Hz, 1H), 2.66 – 2.44 (m, 6H), 2.13 (q, *J* = 11.8 Hz, 1H), 2.01 – 1.88 (m, 4H), 1.31 – 0.81 (m, 9H).  $^{13}\text{C}$  NMR (101 MHz,  $\text{DMSO-}d_6$ )  $\delta$  164.18, 150.65, 148.07, 145.27, 141.72, 137.01, 132.51, 130.28, 129.89, 128.42, 127.50, 126.67, 124.88, 123.92, 120.55, 117.66, 66.21, 65.28, 59.59, 58.86, 57.01, 37.60, 26.65, 24.81, 23.38, 20.80, 15.19, 11.73. HRMS Calcd. For  $[\text{C}_{31}\text{H}_{38}\text{N}_3\text{O}_2]^+$  requires *m/z* 484.2959, found *m/z* 484.2956.

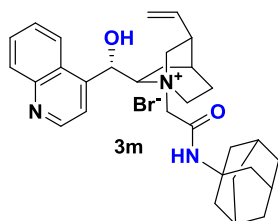

White solid (88% yield). m.p. 196-198 °C;  $[\alpha]_{\text{D}}^{25} +69.4$  (*c* 0.20,  $\text{CHCl}_3$ );  $^1\text{H}$  NMR (400 MHz,  $\text{DMSO-}d_6$ )  $\delta$  8.97 (d, *J* = 4.5 Hz, 1H), 8.47 (d, *J* = 7.4 Hz, 1H), 8.25 (d, *J* = 8.4 Hz, 1H), 8.09 (d, *J* = 8.3 Hz, 1H), 7.90 – 7.73 (m, 2H), 7.71 – 7.55 (m, 1H), 6.78 (dd, *J* = 16.1, 3.7 Hz, 1H), 6.08 – 5.88 (m, 2H), 5.34 – 5.09 (m, 2H), 4.57 (d, *J* = 15.9 Hz, 1H), 4.45 – 4.19 (m, 4H), 3.84 (t, *J* = 11.3 Hz, 1H), 3.69 – 3.52 (m, 1H), 2.81 (q, *J* = 8.8 Hz, 1H), 2.07 (q, *J* = 11.3, 8.1 Hz, 10H), 1.89 (q, *J* = 9.4, 7.6 Hz, 3H), 1.67 (s, 6H), 1.03 – 0.93 (m, 1H).  $^{13}\text{C}$  NMR (101 MHz,  $\text{DMSO-}d_6$ )  $\delta$  163.79, 150.67, 148.04, 145.25, 137.02, 130.30, 129.96, 127.48, 124.83, 123.89, 120.53, 117.60, 66.07, 64.64, 59.48, 59.02, 57.23, 52.69, 49.05, 37.55, 36.33, 29.26, 26.66, 23.36, 20.67, 11.74. HRMS Calcd. For  $[\text{C}_{31}\text{H}_{40}\text{N}_3\text{O}_2]^+$  requires *m/z* 486.3115, found *m/z* 486.3116.

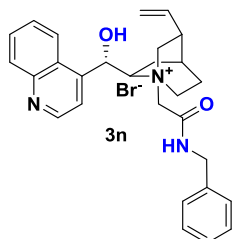

White solid (93% yield). m.p. 190-192 °C;  $[\alpha]_{\text{D}}^{25} +88.0$  (*c* 0.20,  $\text{CHCl}_3$ );  $^1\text{H}$  NMR (400 MHz,  $\text{DMSO-}d_6$ )  $\delta$  9.44 (t, *J* = 5.8 Hz, 1H), 8.97 (d, *J* = 4.5 Hz, 1H), 8.23 – 8.03 (m, 2H), 7.86 – 7.69 (m, 2H), 7.66 – 7.58 (m, 1H), 7.46 – 7.18 (m, 6H), 6.79 (dd, *J* = 15.4, 3.6 Hz, 1H), 6.07 – 5.90 (m, 2H), 5.34 – 5.16 (m, 2H), 4.64 (d, *J* = 15.9 Hz, 1H), 4.55 – 4.44 (m, 3H), 4.40 – 4.20 (m, 3H), 3.95 – 3.79 (m, 1H), 3.71 – 3.58 (m, 1H), 2.83 (q, *J* = 8.9 Hz, 1H), 2.16 (t, *J* = 11.9 Hz, 1H), 1.91 (q, *J* = 8.7, 7.1 Hz, 3H), 1.04 – 0.82 (m, 2H).  $^{13}\text{C}$  NMR (101 MHz,  $\text{DMSO-}d_6$ )  $\delta$  164.49, 150.58, 148.04, 145.20, 138.57, 137.06, 130.28, 129.84, 128.95, 128.05, 127.70, 127.65, 127.58, 124.84, 123.65, 120.51, 117.61, 66.04, 65.12, 59.59, 59.01, 57.38, 42.94, 37.55, 26.62, 23.37, 20.63, 11.74. HRMS Calcd. For  $[\text{C}_{28}\text{H}_{32}\text{N}_3\text{O}_2]^+$  requires *m/z* 442.2489, found *m/z* 442.2485.

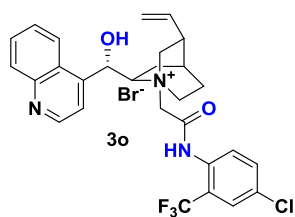

Light yellow solid (87% yield), m.p.133-136 °C;  $[\alpha]_D^{25} +50.0$  (*c* 0.20, CHCl<sub>3</sub>); <sup>1</sup>H NMR (400 MHz, DMSO-*d*<sub>6</sub>) δ 10.82 (s, 1H), 8.98 (d, *J* = 4.5 Hz, 1H), 8.12 (dd, *J* = 27.2, 8.5 Hz, 2H), 8.01 – 7.89 (m, 2H), 7.86 – 7.67 (m, 3H), 7.53 (t, *J* = 7.7 Hz, 1H), 6.86 (dd, *J* = 15.7, 3.4 Hz, 1H), 6.18 – 5.86 (m, 2H), 5.38 – 5.12 (m, 2H), 4.90 (d, *J* = 16.0 Hz, 1H), 4.80 – 4.59 (m, 1H), 4.53 – 4.07 (m, 3H), 3.98 – 3.64(m, 2H), 2.86 (q, *J* = 8.8 Hz, 1H), 2.16 (q, *J* = 11.9 Hz, 1H), 1.93 (d, *J* = 8.4 Hz, 3H), 1.07 – 0.92 (m, 1H). <sup>13</sup>C NMR (101 MHz, DMSO-*d*<sub>6</sub>) δ 165.02, 150.62, 148.07, 145.18, 137.02, 133.95, 132.93 (t, *J* = 9.2 Hz), 130.30, 129.91, 128.19 – 126.33 (m), 124.87, 124.34, 123.75, 121.61, 120.57, 117.67, 66.12, 65.35, 59.60, 59.06, 57.32, 37.56, 26.58, 23.34, 20.71, 11.74. <sup>19</sup>F NMR (376 MHz, DMSO-*d*<sub>6</sub>) δ -59.52 (s, 3F). HRMS Calcd. For [C<sub>28</sub>H<sub>28</sub>ClF<sub>3</sub>N<sub>3</sub>O<sub>2</sub>]<sup>+</sup>requires *m/z* 530.1817, found *m/z* 530.1814.

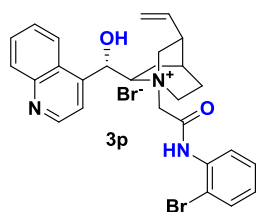

White solid (97% yield). m.p. 172-174 °C;  $[\alpha]_D^{25} +35.6$  (*c* 0.20, CHCl<sub>3</sub>); <sup>1</sup>H NMR (400 MHz, DMSO-*d*<sub>6</sub>) δ 10.67 (s, 1H), 8.99 (d, *J* = 4.5 Hz, 1H), 8.27 – 8.05 (m, 2H), 7.85 – 7.65 (m, 4H), 7.57 – 7.41 (m, 2H), 7.31 (td, *J* = 7.7, 1.7 Hz, 1H), 6.87 (d, *J* = 3.2 Hz, 1H), 6.17 (t, *J* = 3.2 Hz, 1H), 6.02 (ddd, *J* = 17.2, 10.1, 6.8 Hz, 1H), 5.38 – 5.15 (m, 2H), 4.88 (d, *J* = 16.0 Hz, 1H), 4.67 (dd, *J* = 16.1, 12.0 Hz, 1H), 4.41 (t, *J* = 10.5 Hz, 1H), 4.28 (t, *J* = 9.6 Hz, 2H), 3.92 (t, *J* = 11.4 Hz, 1H), 3.80 – 3.65 (m, 1H), 2.86 (q, *J* = 8.7 Hz, 1H), 2.33 – 2.14 (m, 1H), 1.95 (s, 3H), 1.10 – 0.94 (m, 1H). <sup>13</sup>C NMR (101 MHz, DMSO-*d*<sub>6</sub>) δ 163.93, 150.63, 148.08, 145.21, 137.05, 135.12, 133.47, 130.32, 129.90, 129.12, 128.85, 128.61, 127.35, 124.87, 123.85, 120.59, 119.64, 117.67, 66.18, 65.34, 60.23, 59.67, 59.27, 57.56, 37.57, 26.60, 23.39, 20.68, 14.57, 11.75. HRMS Calcd. For [C<sub>27</sub>H<sub>29</sub>BrN<sub>3</sub>O<sub>2</sub>]<sup>+</sup>requires *m/z* 506.1438, found *m/z* 506.1442.

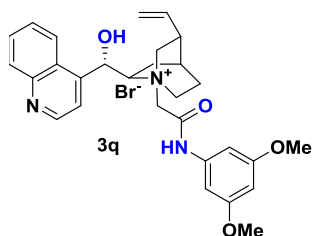

White solid (89% yield), m.p.129-131 °C;  $[\alpha]_D^{25} +66.4$  (*c* 0.20, CHCl<sub>3</sub>); <sup>1</sup>H NMR (400 MHz, DMSO-*d*<sub>6</sub>) δ 11.09 (d, *J* = 3.6 Hz, 1H), 8.98 (d, *J* = 4.5 Hz, 1H), 8.24 (dt, *J* = 8.8, 2.2 Hz, 1H), 8.09 (dd, *J* = 8.5, 1.2 Hz, 1H), 7.81 (ddd, *J* = 9.5, 5.7, 1.7 Hz, 2H), 7.57 (ddd, *J* = 8.4, 6.8, 1.4 Hz, 1H), 7.05 (d, *J* = 2.2 Hz, 2H), 6.80 (dd, *J* = 15.9, 3.6 Hz, 1H), 6.37 (t, *J* = 2.2 Hz, 1H), 6.17 – 5.92

(m, 2H), 5.77 (s, 1H), 5.28 (dd,  $J = 14.9, 3.1$  Hz, 2H), 4.95 – 4.80 (m, 1H), 4.69 (d,  $J = 15.9$  Hz, 1H), 4.44 – 4.21 (m, 3H), 4.00 – 3.87 (m, 1H), 3.78 (s, 8H), 3.38 (s, 2H), 2.86 (q,  $J = 8.8$  Hz, 1H), 2.51 (p,  $J = 1.8$  Hz, 1H), 2.22 (t,  $J = 11.9$  Hz, 1H), 2.04 – 1.87 (m, 3H), 1.16 – 0.96 (m, 1H).  $^{13}\text{C}$  NMR (101 MHz, DMSO- $d_6$ )  $\delta$  163.32, 161.12, 150.66, 148.06, 145.17, 139.90, 137.05, 130.38, 129.90, 127.40, 124.83, 123.72, 120.63, 117.65, 98.43, 96.92, 65.91, 65.35, 59.63, 59.56, 57.54, 55.76, 55.42, 37.56, 26.60, 23.39, 20.63, 11.75. HRMS Calcd. For  $[\text{C}_{29}\text{H}_{34}\text{N}_3\text{O}_4]^+$  requires  $m/z$  488.2544, found  $m/z$  488.2549.

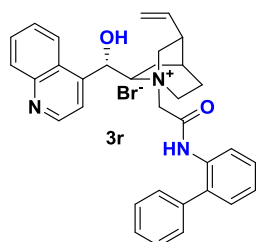

White solid (91% yield), m.p. 172-174 °C;  $[\alpha]_{\text{D}}^{25} +35.6$  ( $c$  0.20,  $\text{CHCl}_3$ );  $^1\text{H}$  NMR (400 MHz, DMSO- $d_6$ )  $\delta$  10.45 (d,  $J = 6.3$  Hz, 1H), 8.97 (d,  $J = 4.5$  Hz, 1H), 8.25 – 7.97 (m, 2H), 7.88 – 7.71 (m, 2H), 7.65 – 7.35 (m, 9H), 7.32 – 7.23 (m, 1H), 6.74 (dd,  $J = 15.0, 3.2$  Hz, 1H), 6.04 – 5.70 (m, 2H), 5.31 – 4.96 (m, 2H), 4.68 (d,  $J = 15.6$  Hz, 1H), 4.44 – 4.07 (m, 3H), 3.93 – 3.70 (m, 2H), 3.54 – 3.40 (m, 1H), 2.77 (q,  $J = 8.8$  Hz, 1H), 2.10 (q,  $J = 12.1$  Hz, 1H), 1.97 – 1.71 (m, 3H), 0.96 – 0.78 (m, 1H).  $^{13}\text{C}$  NMR (101 MHz, DMSO- $d_6$ )  $\delta$  163.59, 150.60, 148.06, 145.18, 139.14, 138.26, 137.01, 133.52, 131.08, 130.28, 129.89, 129.19, 128.99, 128.61, 127.93, 127.80, 127.77, 127.54, 124.87, 123.90, 120.48, 117.63, 66.18, 65.42, 59.41, 57.24, 37.55, 26.53, 23.35, 20.69, 11.72. HRMS Calcd. For  $[\text{C}_{33}\text{H}_{34}\text{N}_3\text{O}_2]^+$  requires  $m/z$  504.2646, found  $m/z$  504.2651.

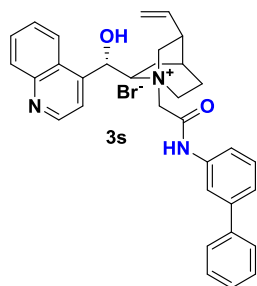

White solid (92% yield), m.p. 145-148 °C;  $[\alpha]_{\text{D}}^{25} +76.4$  ( $c$  0.20,  $\text{CHCl}_3$ );  $^1\text{H}$  NMR (400 MHz, DMSO- $d_6$ )  $\delta$  11.34 (s, 1H), 8.98 (d,  $J = 4.5$  Hz, 1H), 8.31 (dd,  $J = 8.6, 3.3$  Hz, 1H), 8.22 (d,  $J = 2.0$  Hz, 1H), 8.08 (dd,  $J = 8.5, 1.2$  Hz, 1H), 7.86 – 7.73 (m, 3H), 7.71 – 7.64 (m, 2H), 7.59 – 7.48 (m, 5H), 7.46 – 7.37 (m, 1H), 6.81 (dd,  $J = 15.9, 3.7$  Hz, 1H), 6.17 (q,  $J = 5.8, 4.4$  Hz, 1H), 6.02 (dd,  $J = 17.3, 10.2$  Hz, 1H), 5.33 – 5.20 (m, 2H), 5.00 (d,  $J = 15.8$  Hz, 1H), 4.78 (d,  $J = 15.6$  Hz, 1H), 4.54 – 4.19 (m, 3H), 4.08 – 3.98 (m, 1H), 3.83 – 3.65 (m, 1H), 2.87 (d,  $J = 8.4$  Hz, 1H), 2.29 – 2.14 (m, 1H), 1.92 (d,  $J = 12.0$  Hz, 3H), 1.10 – 0.97 (m, 1H).  $^{13}\text{C}$  NMR (101 MHz, DMSO- $d_6$ )  $\delta$  170.79, 163.37, 150.67, 148.07, 145.22, 141.47, 140.27, 138.87, 137.04, 130.36, 130.21, 129.83, 129.56, 128.30, 127.43, 127.09, 124.85, 123.83, 123.43, 120.64, 119.15, 118.50, 117.65, 65.88, 65.54, 60.24, 59.71, 59.43, 57.55, 37.57, 26.62, 23.43, 21.25, 20.69, 14.56, 11.75. HRMS Calcd. For  $[\text{C}_{33}\text{H}_{34}\text{N}_3\text{O}_2]^+$  requires  $m/z$  504.2646, found  $m/z$  504.2648.



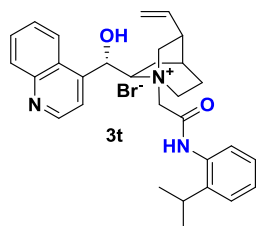

White solid (89% yield), m.p. 216-219 °C;  $[\alpha]_D^{25} +64.5$  (*c* 0.20, CHCl<sub>3</sub>); <sup>1</sup>H NMR (400 MHz, DMSO-*d*<sub>6</sub>) δ 10.41 (s, 1H), 8.99 (d, *J* = 4.5 Hz, 1H), 8.27 – 8.03 (m, 2H), 7.88 – 7.74 (m, 2H), 7.51 (ddd, *J* = 8.4, 6.8, 1.3 Hz, 1H), 7.43 (d, *J* = 7.9 Hz, 2H), 7.31 (dtd, *J* = 21.0, 7.4, 1.6 Hz, 2H), 6.88 (d, *J* = 3.4 Hz, 1H), 6.15 – 5.95 (m, 2H), 5.45 – 5.12 (m, 2H), 5.00 – 4.61 (m, 2H), 4.48 – 4.21 (m, 3H), 3.91 – 3.68 (m, 2H), 3.31 – 3.13 (m, 1H), 2.87 (q, *J* = 8.8 Hz, 1H), 2.17 (q, *J* = 12.3 Hz, 1H), 1.93 (d, *J* = 13.1 Hz, 3H), 1.16 (dd, *J* = 21.0, 6.8 Hz, 6H), 1.04 (dt, *J* = 15.4, 9.0 Hz, 1H). <sup>13</sup>C NMR (101 MHz, DMSO-*d*<sub>6</sub>) δ 164.15, 150.65, 148.07, 145.23, 144.06, 137.08, 133.38, 130.34, 129.91, 127.82, 127.51, 127.47, 126.51, 124.88, 123.76, 120.57, 117.67, 66.21, 65.21, 59.67, 59.26, 57.42, 37.59, 27.74, 26.64, 23.97, 23.84, 23.39, 20.69, 11.75. HRMS Calcd. For [C<sub>30</sub>H<sub>36</sub>N<sub>3</sub>O<sub>2</sub>]<sup>+</sup> requires *m/z* 470.2802, found *m/z* 470.2804.

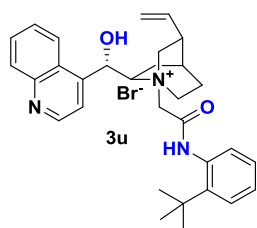

White solid (95% yield), m.p. 179-182 °C;  $[\alpha]_D^{25} +21.5$  (*c* 0.20, CHCl<sub>3</sub>); <sup>1</sup>H NMR (400 MHz, DMSO-*d*<sub>6</sub>) δ 10.34 (d, *J* = 6.3 Hz, 1H), 8.99 (d, *J* = 4.5 Hz, 1H), 8.32 – 8.19 (m, 1H), 8.09 (dd, *J* = 8.5, 1.2 Hz, 1H), 7.86 – 7.73 (m, 2H), 7.62 – 7.46 (m, 2H), 7.36 – 7.18 (m, 3H), 6.87 (dd, *J* = 16.1, 3.6 Hz, 1H), 6.19 – 5.93 (m, 2H), 5.37 – 5.20 (m, 2H), 4.93 (d, *J* = 16.2 Hz, 1H), 4.69 (d, *J* = 16.3 Hz, 1H), 4.49 – 4.32 (m, 2H), 4.22 (d, *J* = 9.8 Hz, 1H), 3.95 (t, *J* = 11.4 Hz, 1H), 3.85 – 3.66 (m, 1H), 2.86 (q, *J* = 8.8 Hz, 1H), 2.23 – 2.09 (m, 1H), 1.97 – 1.82 (m, 3H), 1.39 (d, *J* = 1.5 Hz, 10H), 0.99 (d, *J* = 12.1 Hz, 1H). <sup>13</sup>C NMR (101 MHz, DMSO-*d*<sub>6</sub>) δ 164.81, 150.65, 148.09, 147.17, 145.30, 137.05, 134.52, 131.91, 130.31, 129.92, 128.35, 127.51, 127.11, 124.93, 123.94, 120.58, 117.66, 66.29, 65.39, 65.10, 59.66, 59.28, 57.22, 37.61, 35.28, 31.45, 31.40, 26.68, 23.38, 20.76, 15.65, 11.74. HRMS Calcd. For [C<sub>31</sub>H<sub>38</sub>N<sub>3</sub>O<sub>2</sub>]<sup>+</sup> requires *m/z* 484.2959, found *m/z* 484.2963.

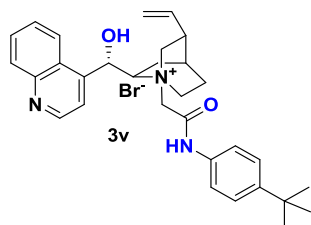

White solid (86% yield), m.p. 181-183 °C;  $[\alpha]_D^{25} +46.3$  (*c* 0.20, CHCl<sub>3</sub>); <sup>1</sup>H NMR (400 MHz, DMSO-*d*<sub>6</sub>) δ 11.05 (d, *J* = 3.9 Hz, 1H), 8.98 (d, *J* = 4.5 Hz, 1H), 8.26 (d, *J* = 8.3 Hz, 1H), 8.09 (dd, *J* = 8.5, 1.3 Hz, 1H), 7.88 – 7.69 (m, 4H), 7.67 – 7.53 (m, 1H), 7.46 (dd, *J* = 8.7, 1.8 Hz, 2H), 6.80 (dd, *J* = 16.0, 3.6 Hz, 1H), 6.18 – 5.90 (m, 2H), 5.28 (ddd, *J* = 14.6, 3.1, 1.4 Hz, 2H), 4.87 (t, *J* =

14.3 Hz, 1H), 4.69 (d,  $J = 15.8$  Hz, 1H), 4.43 – 4.21 (m, 3H), 3.95 (d,  $J = 11.1$  Hz, 1H), 3.73 (q,  $J = 9.3$  Hz, 1H), 2.86 (q,  $J = 8.8$  Hz, 1H), 2.51 (p,  $J = 1.8$  Hz, 1H), 2.34 – 2.06 (m, 1H), 1.94 (t,  $J = 8.2$  Hz, 3H), 1.29 (s, 9H), 1.05 (q,  $J = 8.0, 6.4$  Hz, 1H).  $^{13}\text{C}$  NMR (101 MHz, DMSO- $d_6$ )  $\delta$  170.79, 162.91, 150.63, 148.05, 147.51, 145.24, 145.19, 137.06, 135.70, 130.34, 129.86, 127.57, 126.16, 126.00, 124.83, 123.76, 120.67, 120.60, 119.90, 117.65, 65.91, 65.39, 60.23, 59.63, 59.47, 57.51, 37.57, 34.64, 31.62, 26.61, 23.41, 21.25, 20.65, 14.57, 11.75. HRMS Calcd. For  $[\text{C}_{31}\text{H}_{38}\text{N}_3\text{O}_2]^+$  requires  $m/z$  484.2959, found  $m/z$  484.2965.

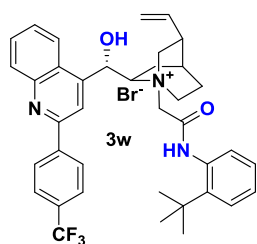

White solid (92% yield), m.p. 247-251°C;  $[\alpha]_{\text{D}}^{25} +17.6$  ( $c$  0.20,  $\text{CHCl}_3$ );  $^1\text{H}$  NMR (400 MHz, DMSO- $d_6$ )  $\delta$  10.37 (s, 1H), 8.52 (d,  $J = 8.1$  Hz, 2H), 8.40 (s, 1H), 8.33 (d,  $J = 8.5$  Hz, 1H), 8.19 (dd,  $J = 8.5, 1.2$  Hz, 1H), 7.98 (d,  $J = 8.2$  Hz, 2H), 7.90 – 7.79 (m, 1H), 7.65 – 7.56 (m, 1H), 7.51 (dd,  $J = 7.9, 1.6$  Hz, 1H), 7.40 – 7.24 (m, 3H), 7.01 (d,  $J = 3.5$  Hz, 1H), 6.26 – 6.05 (m, 2H), 5.35 – 5.20 (m, 2H), 4.98 (d,  $J = 16.3$  Hz, 1H), 4.72 (d,  $J = 16.3$  Hz, 1H), 4.42 (q,  $J = 8.5$  Hz, 2H), 4.27 (d,  $J = 11.8$  Hz, 1H), 4.00 (t,  $J = 11.2$  Hz, 1H), 3.77 (t,  $J = 10.4$  Hz, 1H), 3.35 (s, 1H), 2.86 (d,  $J = 8.8$  Hz, 1H), 2.30 (t,  $J = 12.0$  Hz, 1H), 1.95 (d,  $J = 8.2$  Hz, 3H), 1.40 (s, 9H), 1.09 (t,  $J = 7.0$  Hz, 1H).  $^{13}\text{C}$  NMR (101 MHz, DMSO)  $\delta$  164.82, 154.61, 148.11, 142.84, 147.12 (d,  $J = 9.1$  Hz), 137.18, 134.53, 131.93, 130.69 (d,  $J = 6.3$  Hz), 130.39, 130.07, 128.55, 128.36, 128.03, 127.50, 127.12, 126.64 – 126.16 (m), 126.09, 124.40, 123.98, 123.38, 66.64, 65.34, 59.68, 59.31, 57.22, 38.06, 35.29, 31.41, 26.78, 23.45, 20.70. HRMS Calcd. For  $[\text{C}_{31}\text{H}_{38}\text{N}_3\text{O}_2]^+$  requires  $m/z$  484.2959, found  $m/z$  484.2965. HRMS Calcd. For  $[\text{C}_{38}\text{H}_{41}\text{F}_3\text{N}_3\text{O}_2]^+$  requires  $m/z$  628.3145, found  $m/z$  628.3141.

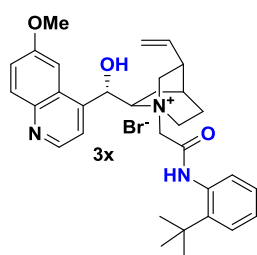

Light yellow solid (93% yield), m.p. 263-265 °C,  $[\alpha]_{\text{D}}^{25} +26.5$  ( $c$  0.20,  $\text{CHCl}_3$ );  $^1\text{H}$  NMR (400 MHz, DMSO- $d_6$ )  $\delta$  10.32 (s, 1H), 8.80 (d,  $J = 4.5$  Hz, 1H), 7.94 (d,  $J = 9.2$  Hz, 1H), 7.77 (d,  $J = 4.6$  Hz, 1H), 7.54 – 7.18 (m, 6H), 6.87 (d,  $J = 3.3$  Hz, 1H), 6.12 – 5.88 (m, 2H), 5.36 – 5.18 (m, 2H), 4.84 (d,  $J = 16.8$  Hz, 1H), 4.72 – 4.39 (m, 3H), 4.23 (t,  $J = 11.0$  Hz, 1H), 3.83 – 3.67 (m, 2H), 3.42 (s, 3H), 2.85 (q,  $J = 8.7$  Hz, 1H), 2.17 – 1.81 (m, 4H), 1.37 (s, 9H), 0.91 (d,  $J = 6.9$  Hz, 1H).  $^{13}\text{C}$  NMR (101 MHz, DMSO- $d_6$ )  $\delta$  165.16, 158.36, 147.72, 146.80, 144.21, 143.92, 137.02, 134.28, 131.80, 131.72, 128.23, 127.41, 126.92, 126.15, 122.78, 120.82, 117.66, 101.91, 66.59, 64.05, 60.79, 59.52, 57.31, 56.13, 37.73, 35.28, 31.44, 26.83, 23.32, 20.96, 11.75. HRMS Calcd. For  $[\text{C}_{32}\text{H}_{40}\text{N}_3\text{O}_3]^+$  requires  $m/z$  514.3064, found  $m/z$  514.3060.

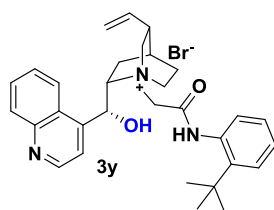

White solid (88% yield), m.p.215-217 °C;  $[\alpha]_D^{25}$  -11.3 (*c* 0.20, CHCl<sub>3</sub>); <sup>1</sup>H NMR (400 MHz, DMSO-*d*<sub>6</sub>) δ 10.39 (s, 1H), 8.98 (d, *J* = 4.5 Hz, 1H), 8.21 (dd, *J* = 8.6, 1.3 Hz, 1H), 8.08 (dd, *J* = 8.4, 1.2 Hz, 1H), 7.84 – 7.68 (m, 2H), 7.61 – 7.43 (m, 2H), 7.35 – 7.21 (m, 3H), 6.88 (d, *J* = 4.1 Hz, 1H), 6.14 (t, *J* = 3.5 Hz, 1H), 5.72 – 5.61 (m, 1H), 5.34 – 4.98 (m, 2H), 4.96 – 4.64 (m, 2H), 4.47 (q, *J* = 10.6, 9.9 Hz, 2H), 4.30 (dt, *J* = 12.6, 3.2 Hz, 1H), 4.00 (dd, *J* = 12.6, 10.2 Hz, 1H), 3.90 – 3.77 (m, 1H), 2.88 (s, 1H), 2.22 – 1.89 (m, 4H), 1.38 (s, 9H), 1.15 – 0.96 (m, 1H). <sup>13</sup>C NMR (101 MHz, DMSO-*d*<sub>6</sub>) δ 164.97, 150.64, 148.05, 147.19, 145.38, 138.58, 134.53, 131.89, 130.35, 129.96, 128.33, 127.48, 127.46, 127.14, 124.72, 123.69, 120.49, 116.17, 65.96, 64.51, 60.40, 59.31, 56.21, 37.29, 35.27, 31.40, 25.76, 25.26, 21.55. HRMS Calcd. For [C<sub>31</sub>H<sub>38</sub>N<sub>3</sub>O<sub>2</sub>]<sup>+</sup>requires *m/z* 484.2959, found *m/z* 484.2955.

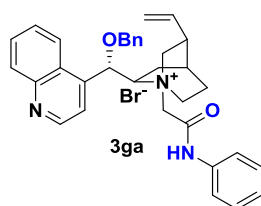

White solid (91% yield), m.p.161-164 °C;  $[\alpha]_D^{25}$  +31.5 (*c* 0.20, CHCl<sub>3</sub>); <sup>1</sup>H NMR (400 MHz, Methanol-*d*<sub>4</sub>) δ 8.99 (d, *J* = 4.6 Hz, 1H), 8.35 (d, *J* = 8.5 Hz, 1H), 8.13 (dd, *J* = 8.5, 1.2 Hz, 1H), 7.93 – 7.74 (m, 4H), 7.65 (ddd, *J* = 8.4, 6.9, 1.3 Hz, 1H), 7.49 – 7.32 (m, 7H), 7.23 (td, *J* = 7.4, 1.3 Hz, 1H), 6.04 (d, *J* = 2.8 Hz, 1H), 5.93 (ddd, *J* = 17.2, 10.6, 6.6 Hz, 1H), 5.28 – 5.03 (m, 2H), 4.75 – 4.53 (m, 3H), 4.52 – 4.33 (m, 4H), 3.79 (t, *J* = 11.3 Hz, 1H), 3.71 – 3.55 (m, 1H), 2.89 (q, *J* = 8.8 Hz, 1H), 2.46 (t, *J* = 12.1 Hz, 1H), 2.11 – 1.89 (m, 3H), 1.21 (ddd, *J* = 13.9, 8.8, 5.0 Hz, 1H). <sup>13</sup>C NMR (101 MHz, Methanol-*d*<sub>4</sub>) δ 162.13, 149.57, 147.88, 141.11, 137.35, 135.83, 135.43, 130.05, 128.97, 128.87, 128.79, 128.64, 128.58, 127.60, 125.78, 124.97, 123.25, 120.27, 119.95, 116.58, 70.94, 60.83, 59.41, 57.79, 37.58, 26.90, 22.97, 21.00. HRMS Calcd. For [C<sub>34</sub>H<sub>36</sub>N<sub>3</sub>O<sub>2</sub>]<sup>+</sup>requires *m/z* 518.2802, found *m/z* 518.2810.

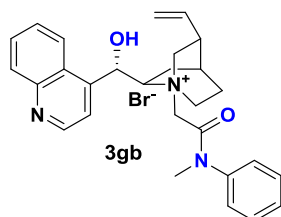

Light yellow solid (81% yield), m.p.126-129 °C;  $[\alpha]_D^{25}$  +24.1 (*c* 0.20, CHCl<sub>3</sub>); <sup>1</sup>H NMR (400 MHz, Methanol-*d*<sub>4</sub>) δ 8.93 (dd, *J* = 4.6, 2.3 Hz, 1H), 8.33 (dd, *J* = 8.5, 1.5 Hz, 1H), 8.11 (dd, *J* = 8.5, 1.3 Hz, 1H), 7.96 – 7.70 (m, 3H), 7.63 – 7.44 (m, 5H), 6.09 – 5.75 (m, 2H), 5.29 – 5.13 (m, 2H), 4.89 (s, 2H), 4.72 (d, *J* = 9.6 Hz, 2H), 4.44 – 4.20 (m, 3H), 3.48 (d, *J* = 2.4 Hz, 5H), 2.81 (q, *J* = 9.0 Hz, 1H), 2.29 – 2.12 (m, 1H), 2.04 – 1.91 (m, 3H), 1.02 – 0.73 (m, 2H). <sup>13</sup>C NMR (101

---

MHz, MeOD)  $\delta$  163.84, 149.63, 147.33, 141.00, 135.50, 130.51, 129.89, 129.23, 128.84, 127.48, 127.10, 124.89, 123.17, 119.72, 116.57, 66.73, 63.71, 61.23, 58.46, 57.33, 37.70, 36.88, 27.03, 23.18, 20.38. HRMS Calcd. For  $[\text{C}_{28}\text{H}_{32}\text{N}_3\text{O}_2]^+$  requires  $m/z$  442.2492, found  $m/z$  442.2497.

### **1.3 Commercial grade reagents and solvents**

Commercial grade reagents, bases and solvents were purchased from Sinoreagent, Meryer and Energy-Chemical without further purifications.

## 2. General procedure for the enantioselective fluorination of 4-substituted pyrazolones

### 2.1 Optimization of reaction parameters for the asymmetric fluorination

**Table S1.** Screening of catalysts for asymmetric fluorination of pyrazolone **1a**<sup>a</sup>

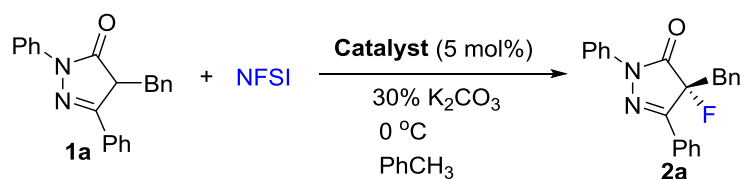

| Entry     | Cat.         | Base                                   | Time [h]   | Yield [%] <sup>b</sup> | <i>ee</i> [%] <sup>c</sup> |
|-----------|--------------|----------------------------------------|------------|------------------------|----------------------------|
| 1         | -            | -                                      | 4          | 77                     | Nd                         |
| 2         | <b>Cat 1</b> | -                                      | 4          | 75                     | 6 ( <i>S</i> )             |
| 3         | <b>Cat 2</b> | 30% K <sub>2</sub> CO <sub>3</sub>     | 1          | 95                     | Nd                         |
| 4         | <b>3a</b>    | 30% K <sub>2</sub> CO <sub>3</sub>     | 1          | 94                     | 8 ( <i>S</i> )             |
| 5         | <b>3b</b>    | 30% K <sub>2</sub> CO <sub>3</sub>     | 1          | 96                     | 6 ( <i>S</i> )             |
| 6         | <b>3c</b>    | 30% K <sub>2</sub> CO <sub>3</sub>     | 4          | 78                     | 3 ( <i>S</i> )             |
| 7         | <b>3d</b>    | 30% K <sub>2</sub> CO <sub>3</sub>     | 1          | 97                     | 21 ( <i>S</i> )            |
| 8         | <b>3e</b>    | 30% K <sub>2</sub> CO <sub>3</sub>     | 1          | 92                     | 3 ( <i>S</i> )             |
| 9         | <b>3f</b>    | 30% K <sub>2</sub> CO <sub>3</sub>     | 1          | 95                     | 14 ( <i>S</i> )            |
| 10        | <b>3g</b>    | 30% K <sub>2</sub> CO <sub>3</sub>     | 0.2        | 97                     | 37 ( <i>R</i> )            |
| 11        | <b>3k</b>    | 30% K <sub>2</sub> CO <sub>3</sub>     | 0.2        | 96                     | 42 ( <i>R</i> )            |
| 12        | <b>3l</b>    | 30% K <sub>2</sub> CO <sub>3</sub>     | 0.2        | 98                     | 51 ( <i>R</i> )            |
| 13        | <b>3m</b>    | 30% K <sub>2</sub> CO <sub>3</sub>     | 0.2        | 98                     | 48 ( <i>R</i> )            |
| 14        | <b>3n</b>    | 30% K <sub>2</sub> CO <sub>3</sub>     | 0.2        | 95                     | 14 ( <i>R</i> )            |
| 15        | <b>3o</b>    | 30% K <sub>2</sub> CO <sub>3</sub>     | 0.2        | 97                     | 58 ( <i>R</i> )            |
| 16        | <b>3p</b>    | 30% K <sub>2</sub> CO <sub>3</sub>     | 0.2        | 98                     | 56 ( <i>R</i> )            |
| 17        | <b>3q</b>    | 30% K <sub>2</sub> CO <sub>3</sub>     | 0.2        | 99                     | 19 ( <i>R</i> )            |
| 18        | <b>3r</b>    | 30% K <sub>2</sub> CO <sub>3</sub>     | 0.2        | 99                     | 64 ( <i>R</i> )            |
| 19        | <b>3s</b>    | 30% K <sub>2</sub> CO <sub>3</sub>     | 0.2        | 94                     | 27 ( <i>R</i> )            |
| 20        | <b>3t</b>    | 30% K <sub>2</sub> CO <sub>3</sub>     | 0.2        | 99                     | 67 ( <i>R</i> )            |
| <b>21</b> | <b>3u</b>    | <b>30% K<sub>2</sub>CO<sub>3</sub></b> | <b>0.2</b> | <b>99</b>              | <b>75 (<i>R</i>)</b>       |
| 22        | <b>3v</b>    | 30% K <sub>2</sub> CO <sub>3</sub>     | 0.2        | 99                     | 31 ( <i>R</i> )            |

|    |           |                                    |     |    |                 |
|----|-----------|------------------------------------|-----|----|-----------------|
| 23 | <b>3w</b> | 30% K <sub>2</sub> CO <sub>3</sub> | 0.2 | 99 | 74 ( <i>R</i> ) |
| 24 | <b>3x</b> | 30% K <sub>2</sub> CO <sub>3</sub> | 0.2 | 99 | 73 ( <i>R</i> ) |
| 25 | <b>3y</b> | 30% K <sub>2</sub> CO <sub>3</sub> | 0.2 | 99 | 74 ( <i>S</i> ) |

<sup>a</sup> Unless specified otherwise, reactions were carried out with **1a** (0.1 mmol), N-fluorobenzenesulfonimide (NFSI) (0.12 mmol), Cat (5 mol %) and 30% K<sub>2</sub>CO<sub>3</sub> (0.2 mL) in toluene (1 mL) at 15 °C.

<sup>b</sup> Isolated yield.

<sup>c</sup> The ee values were determined by using chiral HPLC.

**Table S2. Evaluation of different temperatures**

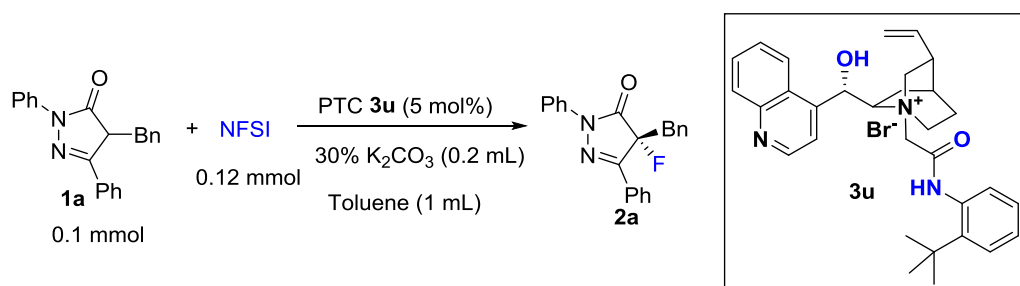

| Entry    | T [°C]     | Time [min] | Yield <sup>b</sup> [%] | ee <sup>c</sup> [%] |
|----------|------------|------------|------------------------|---------------------|
| 1        | 30         | 10         | 99                     | 67                  |
| 2        | 15         | 10         | 99                     | 72                  |
| 3        | -10        | 10         | 99                     | 81                  |
| <b>4</b> | <b>-20</b> | <b>30</b>  | <b>99</b>              | <b>85</b>           |
| 5        | -30        | 60         | 78                     | 67                  |
| 6        | -40        | 120        | 67                     | 43                  |

<sup>a</sup> Unless specified otherwise, reactions were carried out with **1a** (0.1 mmol), N-fluorobenzenesulfonimide (NFSI) (0.12 mmol), **PTC 3u** (5 mol%) and base (0.2 mL) in toluene (1 mL)

<sup>b</sup> Isolated yield.

<sup>c</sup> The ee values were determined by using chiral HPLC.

**Table S3. Evaluation of different bases**

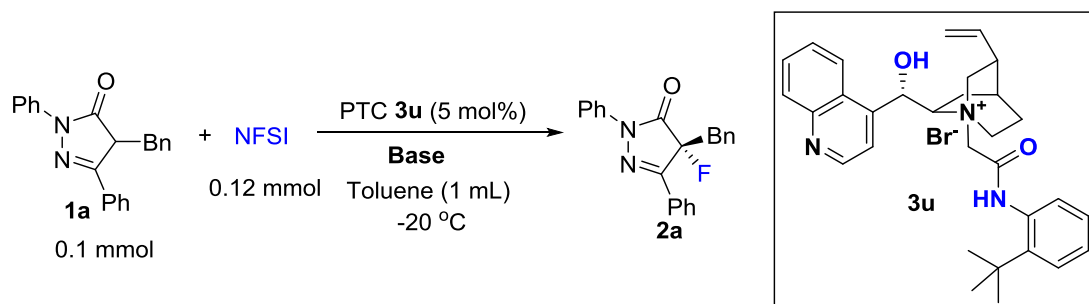

| Entry    | Base                                              | Time [min] | Yield <sup>b</sup> [%] | ee <sup>c</sup> [%] |
|----------|---------------------------------------------------|------------|------------------------|---------------------|
| 1        | Solid K <sub>2</sub> CO <sub>3</sub> (0.2 equiv.) | 10         | 99                     | 68                  |
| 2        | Solid KOH (0.2 equiv.)                            | 10         | 99                     | 53                  |
| 3        | 30% C <sub>S2</sub> CO <sub>3</sub> (0.2 mL)      | 10         | 93                     | 73                  |
| 4        | 10% KOH (0.2 mL)                                  | 10         | 99                     | 53                  |
| 5        | 50% K <sub>2</sub> HPO <sub>4</sub> (0.2 mL)      | 30         | 99                     | 90                  |
| <b>6</b> | <b>38% K<sub>2</sub>HPO<sub>4</sub></b> (0.2 mL)  | <b>30</b>  | <b>99</b>              | <b>91</b>           |
| 7        | 10% K <sub>2</sub> HPO <sub>4</sub> (0.2 mL)      | 60         | 91                     | 85                  |
| 8        | 25% KF (0.2 mL)                                   | 60         | 94                     | 87                  |
| 9        | 30% CH <sub>3</sub> COOK (0.2 mL)                 | 60         | 96                     | 88                  |
| 10       | 30% K <sub>3</sub> PO <sub>4</sub> (0.2 mL)       | 60         | 98                     | 90                  |

<sup>a</sup> Unless specified otherwise, reactions were carried out with **1a** (0.1 mmol), N-fluorobenzenesulfonimide (NFSI) (0.12 mmol), **PTC 3u** (5 mol%) and base (0.2 mL) in toluene (1 mL) at -20 °C

<sup>b</sup> Isolated yield.

<sup>c</sup> The ee values were determined by using chiral HPLC .

**Table S4. Evaluation of different solvents**

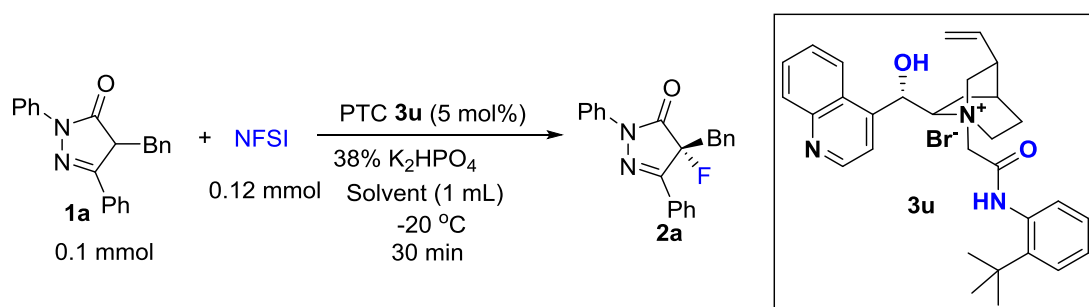

| Entry | Solvent                         | Yield <sup>b</sup> [%] | ee <sup>c</sup> [%] |
|-------|---------------------------------|------------------------|---------------------|
| 1     | PhCF <sub>3</sub>               | 92                     | 81                  |
| 2     | p-xylene                        | 99                     | 89                  |
| 3     | mesitylene                      | 99                     | 91                  |
| 4     | m-xylene                        | 99                     | 89                  |
| 5     | Et <sub>2</sub> O               | 99                     | 27                  |
| 6     | CHCl <sub>3</sub>               | 87                     | 73                  |
| 7     | CH <sub>2</sub> Cl <sub>2</sub> | 91                     | 72                  |
| 8     | n-hexane                        | 98                     | 79                  |

9 acetone 87 68

<sup>a</sup> Unless specified otherwise, reactions were carried out with **1a** (0.1 mmol), N-fluorobenzenesulfonimide (NFSI) (0.12 mmol), PTC **3u** (5 mol%) and 38% K<sub>2</sub>HPO<sub>4</sub> (0.2 mL) in toluene (1 mL) at -20 °C

<sup>b</sup> Isolated yield.

<sup>c</sup> The ee values were determined by using chiral HPLC .

**Table S5. Evaluation of the concentration**

| Entry    | Concentration (mol/L) | Yield <sup>b</sup> [%] | ee <sup>c</sup> [%] |
|----------|-----------------------|------------------------|---------------------|
| 1        | 0.2                   | 99                     | 86                  |
| 2        | 0.1                   | 99                     | 89                  |
| 3        | 0.04                  | 99                     | 93                  |
| <b>4</b> | <b>0.02</b>           | <b>99</b>              | <b>95</b>           |
| 5        | 0.01                  | 95                     | 93                  |

<sup>a</sup> Reactions were carried out with **1a** (0.1 mmol), PTC **3u** (5 mol%) and 38% K<sub>2</sub>HPO<sub>4</sub> in toluene at -20 °C, then N-fluorobenzenesulfonimide (NFSI) (0.11 mmol in toluene) was dropwise added.

<sup>b</sup> Isolated yield.

<sup>c</sup> The ee values were determined by using chiral HPLC.

**Table S6. Evaluation of the catalyst loading**

| Entry    | Catalyst loading [%] | Time [min] | Yield <sup>b</sup> [%] | ee <sup>c</sup> [%] |
|----------|----------------------|------------|------------------------|---------------------|
| 1        | 10                   | 10         | 99                     | 95                  |
| 2        | 2.5                  | 30         | 99                     | 95                  |
| <b>3</b> | <b>0.5</b>           | <b>30</b>  | <b>99</b>              | <b>94</b>           |
| 4        | 0.1                  | 120        | 99                     | 89                  |

<sup>a</sup> Reactions were carried out with **1a** (0.1 mmol), PTC **3u** (0.1-10 mol%) and 38% K<sub>2</sub>HPO<sub>4</sub> (0.2 mL) in toluene (4 mL) at -20 °C, then N-fluorobenzenesulfonimide (NFSI) (0.11 mmol in 1 mL toluene ) was dropwise added.

<sup>b</sup> Isolated yield.

<sup>c</sup> The ee values were determined by using chiral HPLC.



## 2.2 Multigram synthesis of fluoride product **2aa** using subsequent fluorinations

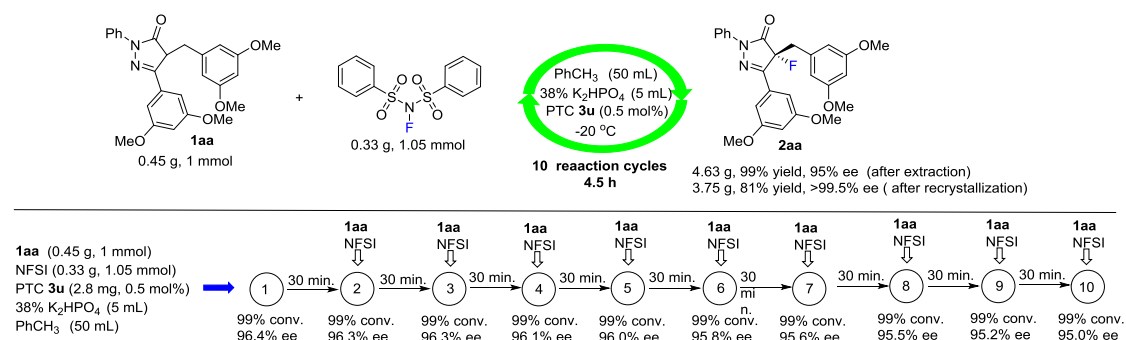

The pyrazolone **1aa** (0.45 g, 1 mmol), NFSI (0.33 g, 1.05 mmol), 38% K<sub>2</sub>HOP<sub>4</sub> (5 mL), PhCH<sub>3</sub> (50 mL) in the presence of 0.5 mol % of PTC **3u** were presented for the first reaction cycle. After completion of the reaction, another portion of pyrazolone **1aa** (1 mmol) and NFSI (1.05 mmol) were added (the second cycle). After each reaction cycle, conversions and ee values were monitored by HPLC analysis. This procedure was repeated after each reaction cycle in order to maintain full conversion of the reaction. We carried out fluorination of **1aa** on 4.5 g scale after 10 reaction cycles, and the crude product **2aa** was obtained in total with 99% yield and 95% ee in 4.5 h after simple extraction with ethyl acetate and washing with water (>95% purity by <sup>1</sup>H-NMR and <sup>19</sup>F-NMR). Note that during ten reaction cycles, the model catalytic reaction did not lose efficiency or enantioselectivity distinctly. Moreover, the optically pure product **2aa** (>99.5% ee) could be easily obtained by recrystallization with ethanol.

### 1-3 circles (HPLC data of chiral **2aa**)

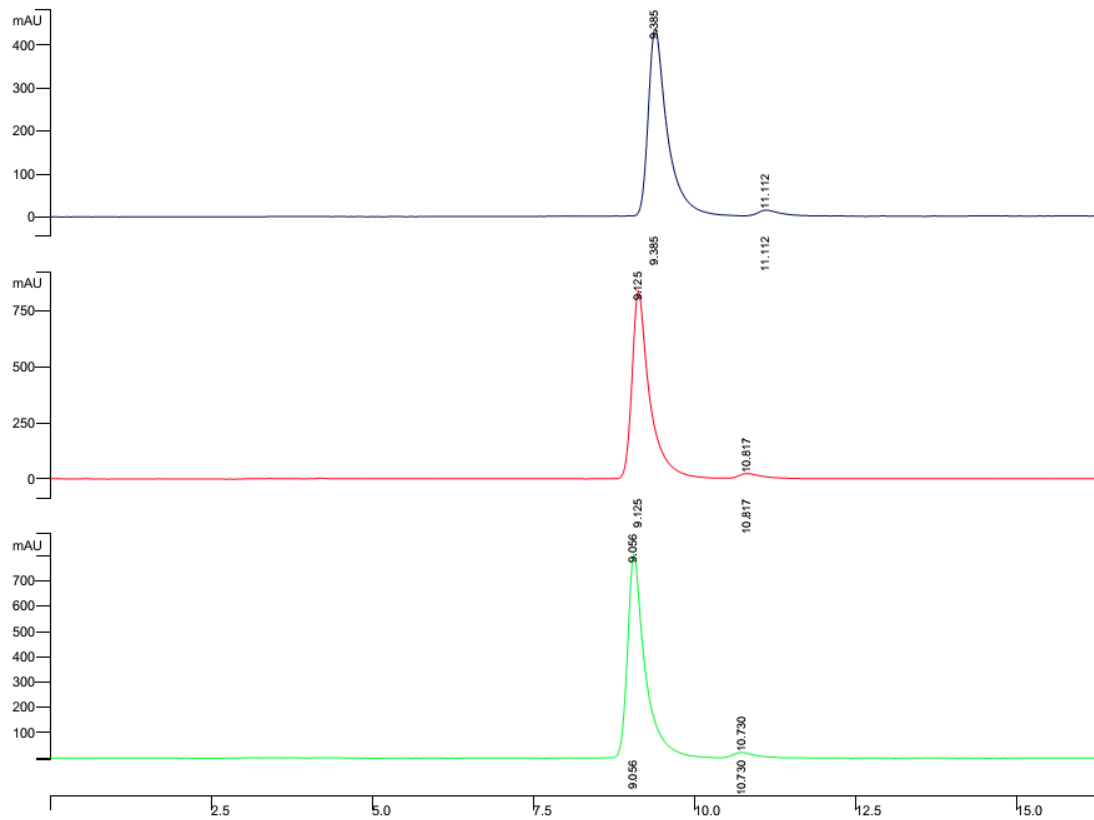

4-6 circles (HPLC data of chiral 2aa)

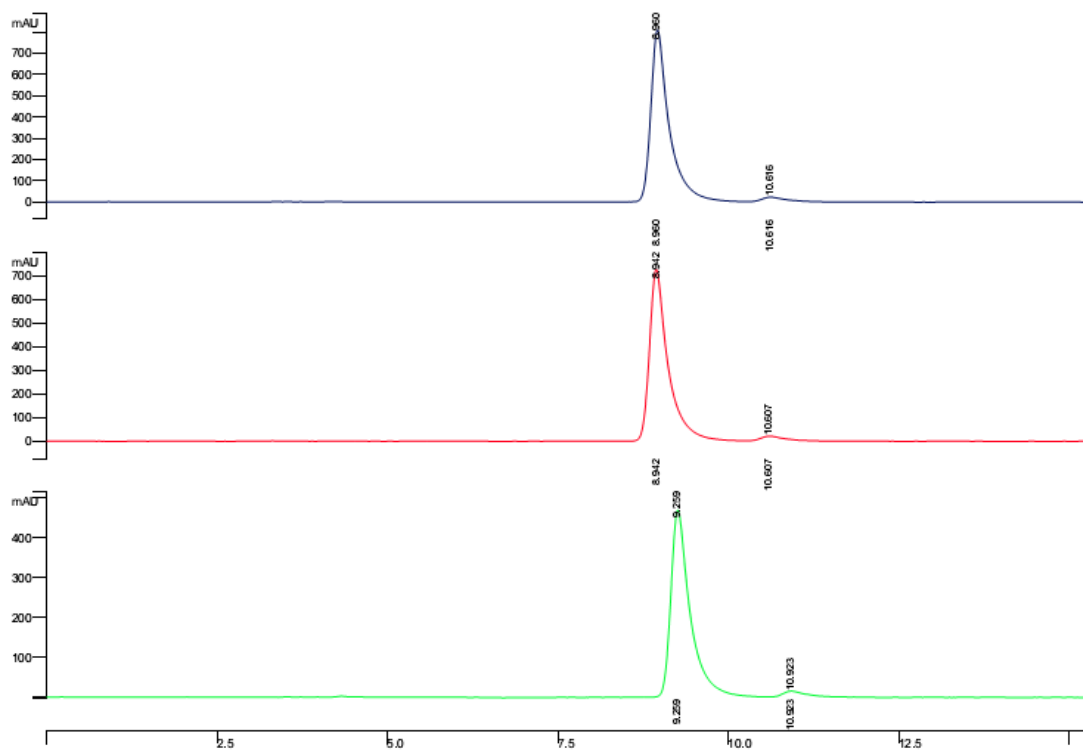

**7-9 circles (HPLC data of chiral 2aa)**

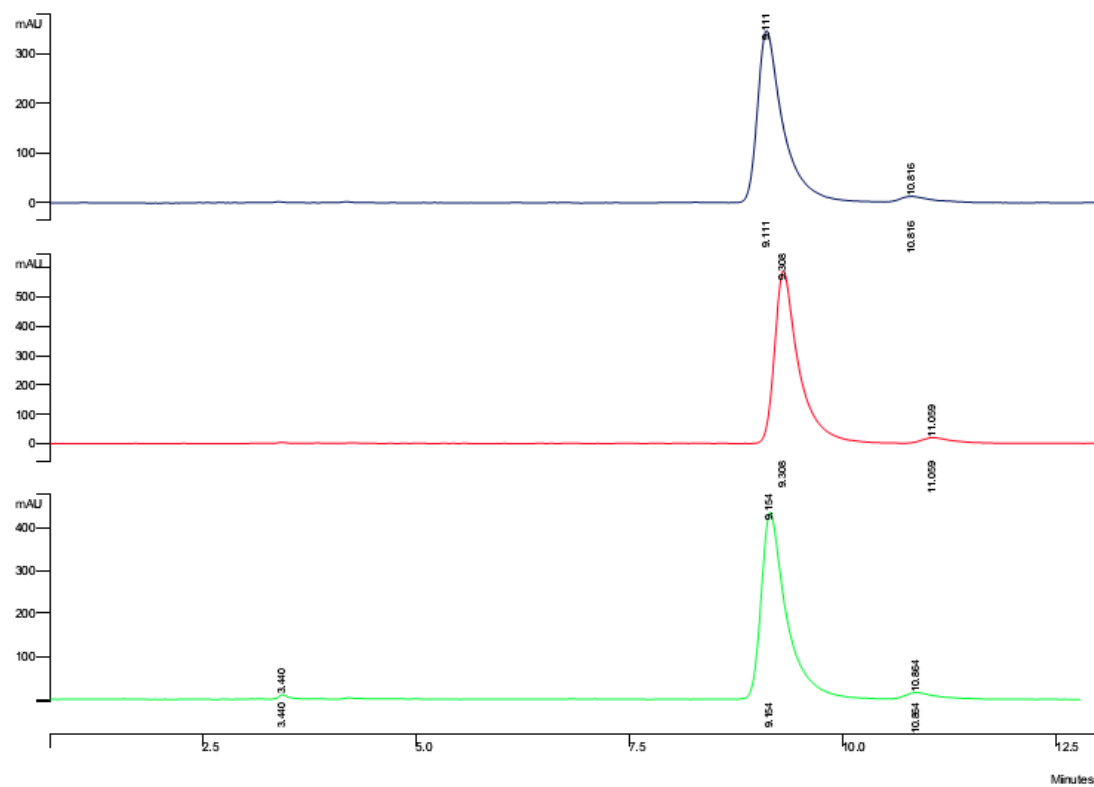

**10 circles after single extraction (4.63 g, 99% yield, 95% ee)**

**HPLC data of chiral 2aa**

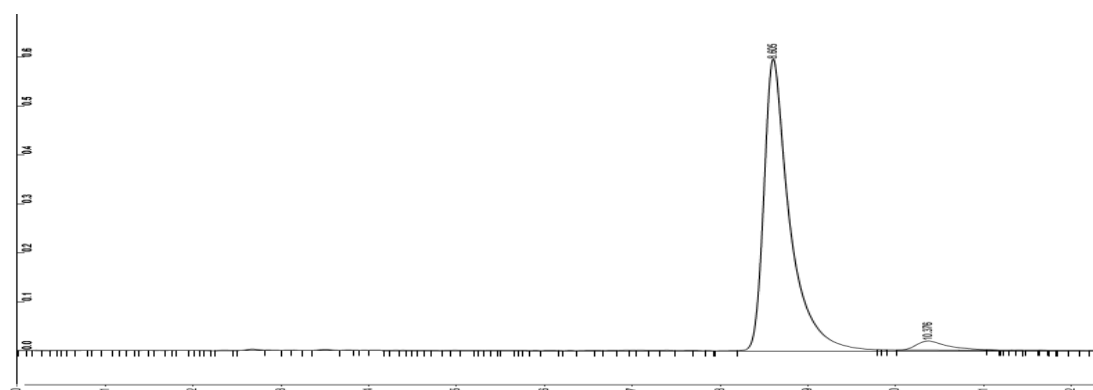

**<sup>1</sup>H NMR of the crude chiral 2aa (>95% purity)**

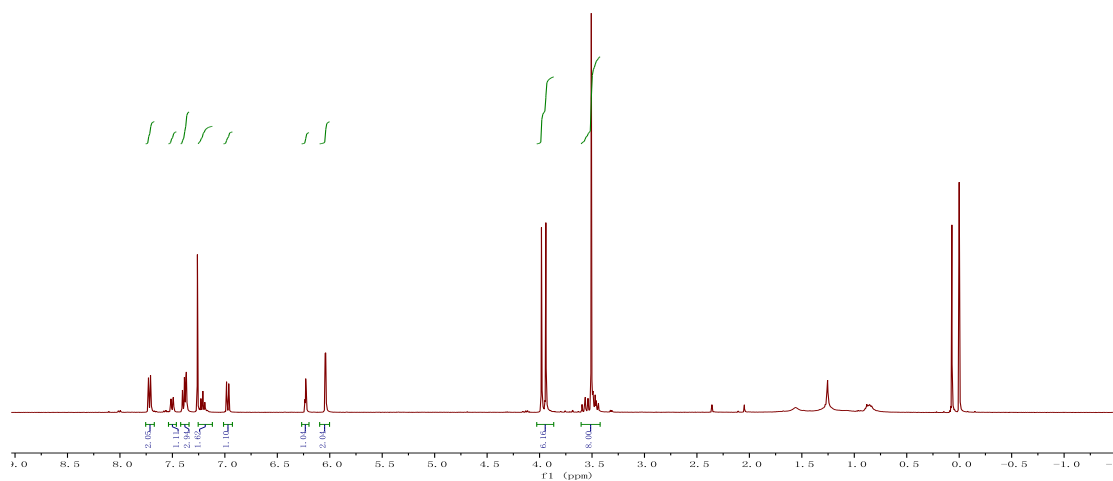

<sup>1</sup>F NMR of the crude chiral **2aa** (>99% con. and residual NFSI and **1aa** was not observed)

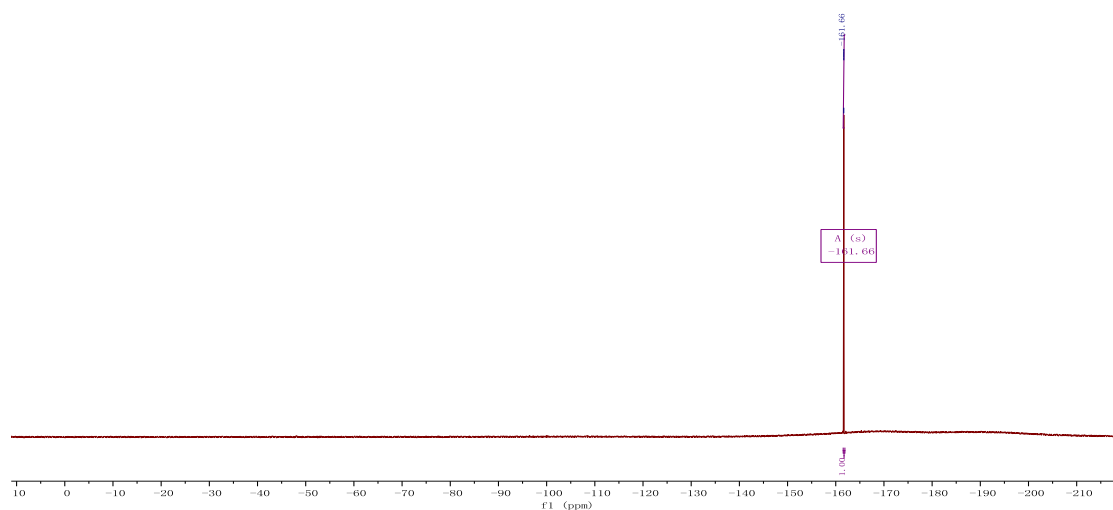

Final chiral product **2aa** after recrystallization with ethanol (3.75 g, 81% yield, >99.5% ee)

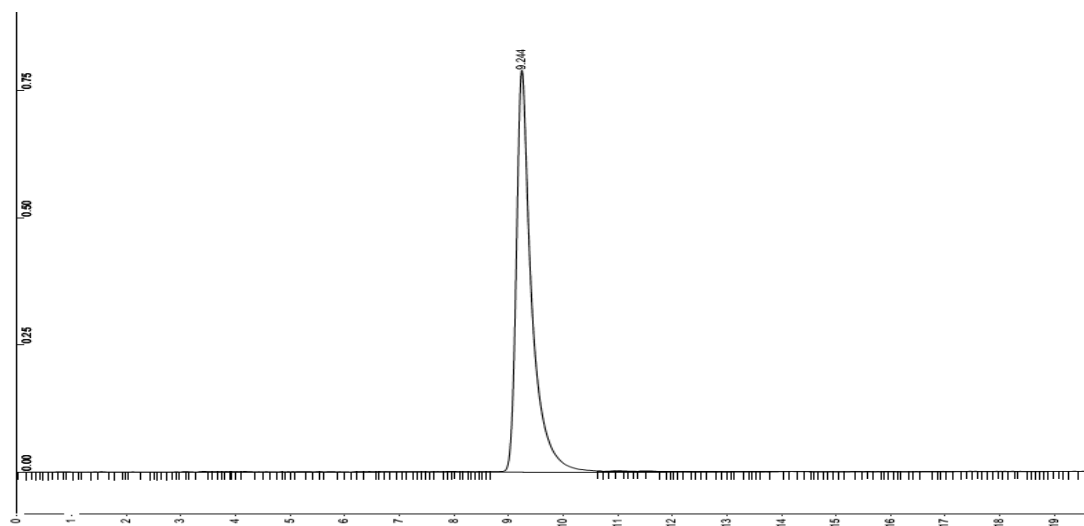

|              |                  |            |
|--------------|------------------|------------|
| 9.244        | Area             | Area%      |
| <b>9.147</b> | <b>154587584</b> | <b>100</b> |

Racemic product:

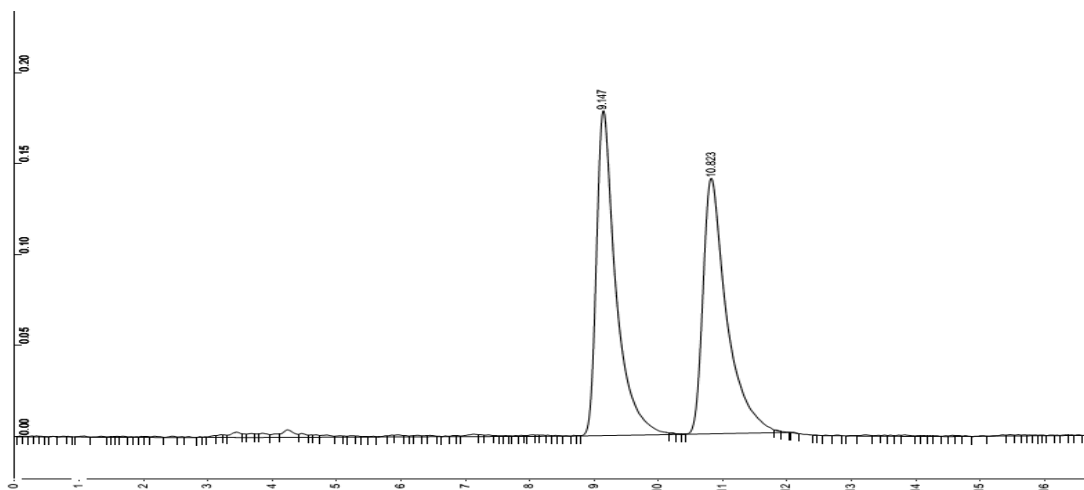

| R.Time        | Area             | Area%          |
|---------------|------------------|----------------|
| <b>9.147</b>  | <b>374877804</b> | <b>51.0278</b> |
| <b>10.823</b> | <b>35977715</b>  | <b>48.9722</b> |

### 3. Experimental procedures and characterization of products

#### 3.1 Achiral fluorination of pyrazolones

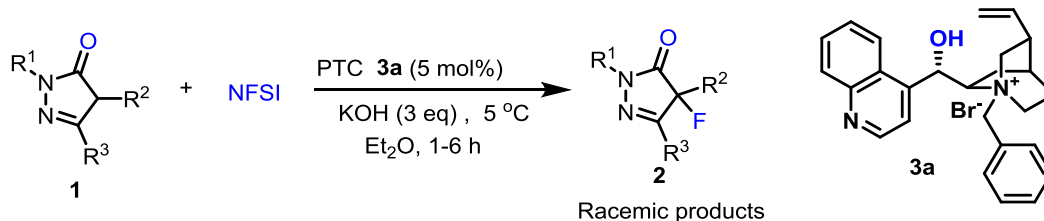

The reaction was conducted with substrate **1** (0.1 mmol) in the presence of PTC **3a** (5 mol%) in Et<sub>2</sub>O (2 mL). Then KOH (0.3 mmol) was added slowly, and the reaction was stirred at 5 °C for 1-6 h. After completion of the reaction (confirmed by TLC analysis), the solvent was removed under reduced pressure and the residue was purified by column chromatography on silica gel (ethyl acetate/petroleum ether) to provide the corresponding products. The *ee* of the products were determined by chiral HPLC.

#### 3.2 Asymmetric fluorination of pyrazolones

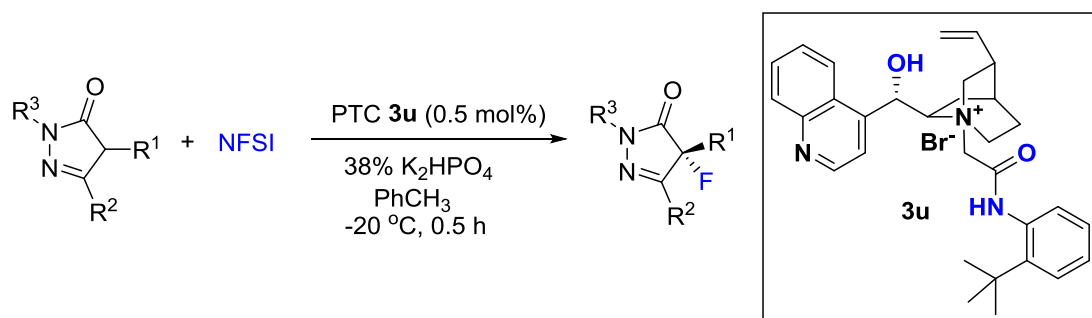

The reaction was conducted with substrate **1** (0.1 mmol) in the presence of PTC **3u** (0.5 mol%) and 38% K<sub>2</sub>HPO<sub>4</sub> (0.2 mL) in toluene (4 mL). then N-fluorobenzenesulfonimide (NFSI) (0.11 mmol in 1 mL toluene) was dropwise added slowly, and the reaction was stirred at -20 °C for 0.5 h. After completion of the reaction (confirmed by TLC analysis), the mixture was diluted with EtOAc (20 mL), washed with water (2×10 mL), dried over anhydrous Na<sub>2</sub>SO<sub>4</sub>, filtered, and concentrated in vacuo. The residue was purified by column chromatography on silica gel (ethyl acetate/petroleum ether) to provide the corresponding products. The *ee* of the product was determined by chiral HPLC.

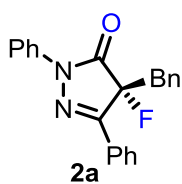

**(R)-4-benzyl-4-fluoro-1,3-diphenyl-1H-pyrazol-5(4H)-one (2a).** White solid, m.p. 58-61 °C,  $[\alpha]_D^{25} +45.1$  (*c* 0.41, CHCl<sub>3</sub>); 99% yield, 94% ee. <sup>1</sup>H NMR (400 MHz, Chloroform-*d*) δ 7.85 – 7.66 (m, 2H), 7.61 – 7.46 (m, 2H), 7.35 (dq, *J* = 9.3, 2.6, 1.8 Hz, 3H), 7.26 – 7.12 (m, 2H), 7.08 – 6.87 (m, 4H), 6.81 – 6.65 (m, 2H), 3.61 – 3.21 (m, 2H). <sup>13</sup>C NMR (101 MHz, Chloroform-*d*) δ 166.88 (d, *J* = 21.5 Hz), 152.99 (d, *J* = 13.9 Hz), 135.78, 130.05, 128.82, 128.72, 128.29, 128.27, 128.01, 127.74, 127.29, 126.84, 125.54, 125.53, 124.80, 118.19, 95.27, 93.28, 40.05 (d, *J* = 26.0 Hz). <sup>19</sup>F NMR (376 MHz, Chloroform-*d*) δ -162.21 (s, 1F). HPLC conditions: Chiralcel AD-H column (250 × 4.6 mm), hexane /*i*-PrOH = 90 / 10, 1 mL / min, 254 nm, τ<sub>R</sub> (major) = 5.85 min, τ<sub>R</sub> (minor) = 5.19 min. HRMS Calcd. for [C<sub>22</sub>H<sub>17</sub>FN<sub>2</sub>O+Na]<sup>+</sup> requires *m/z* = 367.1223, found *m/z* = 367.1221.

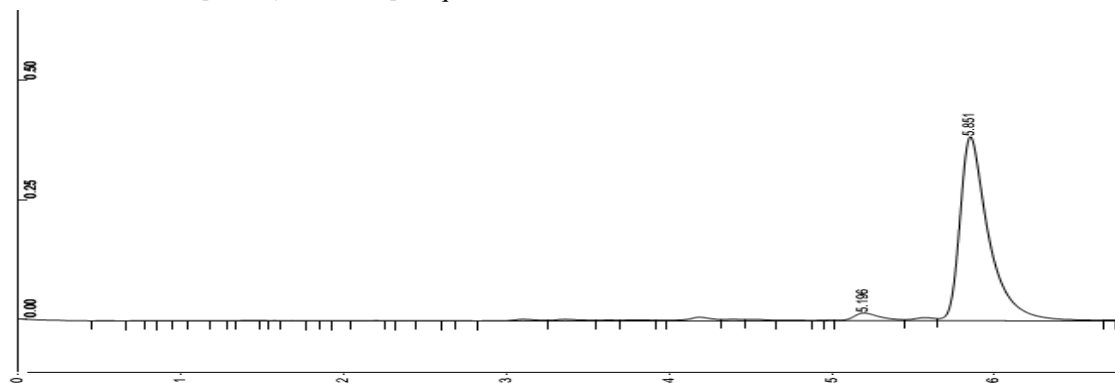

| R.Time       | Area            | Area%          |
|--------------|-----------------|----------------|
| <b>5.196</b> | <b>1525385</b>  | <b>3.1162</b>  |
| <b>5.851</b> | <b>47424796</b> | <b>96.8838</b> |

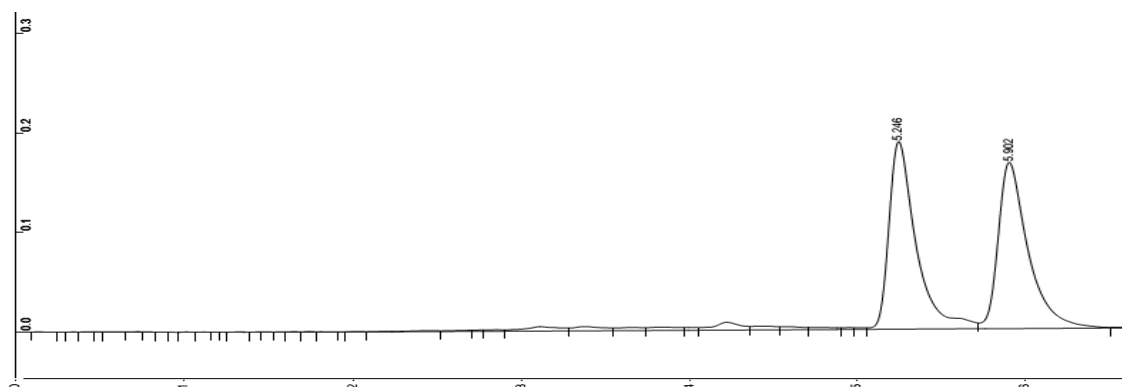

| R.Time       | Area            | Area%          |
|--------------|-----------------|----------------|
| <b>5.246</b> | <b>21100312</b> | <b>50.5611</b> |
| <b>5.902</b> | <b>20632020</b> | <b>49.4389</b> |

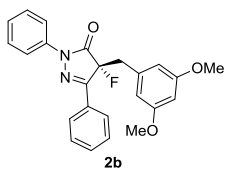

**(R)-4-(3,5-bis(methoxy)benzyl)-4-fluoro-1,3-diphenyl-1H-pyrazol-5(4H)-one (2b).** White solid, m.p. 140-143 °C;  $[\alpha]_D^{25} +95.1$  (*c* 0.43, CHCl<sub>3</sub>); 95% yield, 94% ee. <sup>1</sup>H NMR (400 MHz, Chloroform-*d*)  $\delta$  7.94 – 7.85 (m, 2H), 7.77 – 7.65 (m, 2H), 7.56 – 7.45 (m, 3H), 7.42 – 7.33 (m, 2H), 7.24 – 7.13 (m, 1H), 6.22 (t, *J* = 2.3 Hz, 1H), 6.00 (d, *J* = 2.3 Hz, 2H), 3.68 – 3.37 (m, 8H). <sup>13</sup>C NMR (101 MHz, Chloroform-*d*)  $\delta$  168.07 (d, *J* = 21.3 Hz), 160.50, 154.21 (d, *J* = 13.7 Hz), 136.96, 131.87 (d, *J* = 12.1 Hz), 131.11, 129.58 (d, *J* = 1.7 Hz), 129.05, 128.87, 126.67, 126.66, 125.88, 119.17, 107.40, 100.87, 96.15, 94.17, 55.03, 41.36 (d, *J* = 26.3 Hz). <sup>19</sup>F NMR (376 MHz, Chloroform-*d*)  $\delta$  -161.82 (s, 1F). HPLC conditions: Chiralcel AS-H column (250 × 4.6 mm), hexane /*i*-PrOH = 95 / 5, 1 mL / min, 254 nm,  $\tau_R$  (major) = 7.54 min,  $\tau_R$  (minor) = 8.28 min. HRMS Calcd. for [C<sub>24</sub>H<sub>21</sub>FN<sub>2</sub>O<sub>3</sub>+Na]<sup>+</sup> requires *m/z* = 427.1434, found *m/z* = 427.1431.

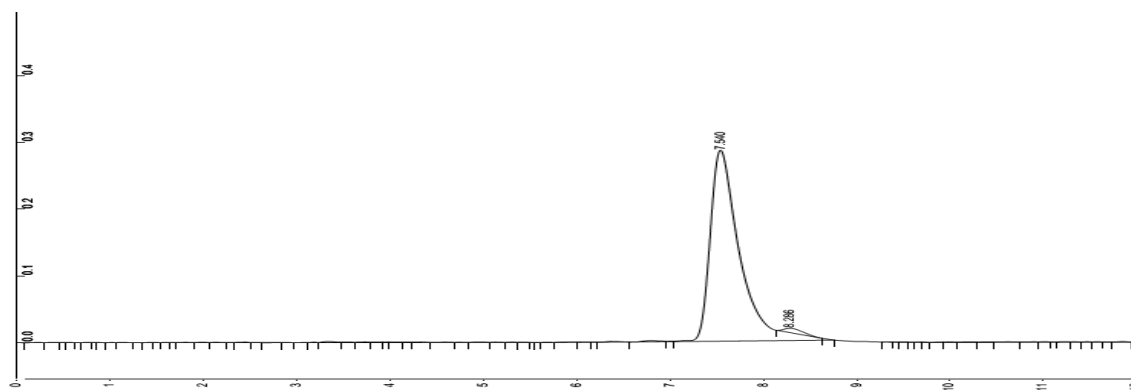

| R.Time       | Area            | Area%          |
|--------------|-----------------|----------------|
| <b>7.540</b> | <b>62948884</b> | <b>97.4068</b> |
| <b>8.286</b> | <b>1675848</b>  | <b>2.5932</b>  |

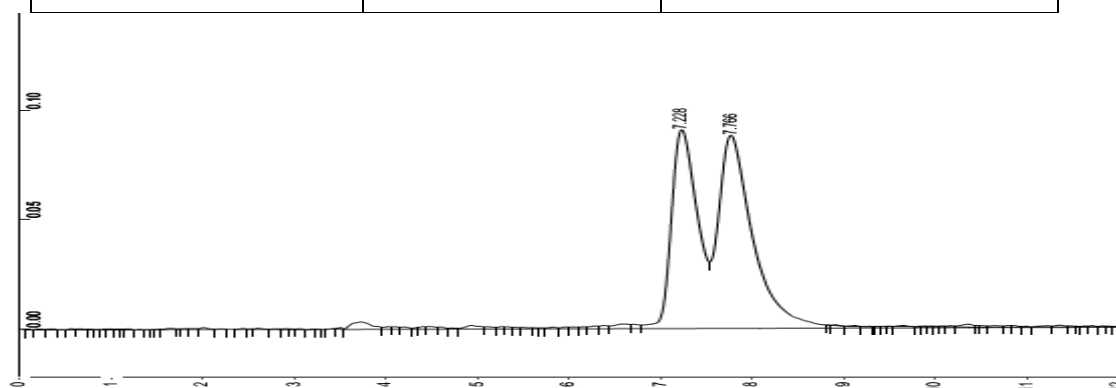

| R.Time       | Area            | Area%          |
|--------------|-----------------|----------------|
| <b>7.228</b> | <b>17800654</b> | <b>46.4521</b> |
| <b>7.766</b> | <b>20519796</b> | <b>53.5479</b> |



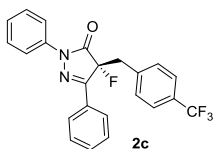

**(R)-4-(4-trifluoromethyl-benzyl)-4-fluoro-1,3-diphenyl-1H-pyrazol-5**

**(4H)-one (2c).** Yellow solid, m.p 102-104 °C;  $[\alpha]_D^{25} +55.6$  (*c* 0.54, CHCl<sub>3</sub>); 98% yield, 87% ee. <sup>1</sup>H NMR (400 MHz, Chloroform-*d*) δ 7.94 – 7.82 (m, 2H), 7.72 – 7.60 (m, 2H), 7.59 – 7.44 (m, 3H), 7.38 (dd, *J* = 8.7, 7.5 Hz, 4H), 7.26 – 7.16 (m, 2H), 7.02 (d, *J* = 8.0 Hz, 2H), 3.73 – 3.48 (m, 2H). <sup>13</sup>C NMR (101 MHz, Chloroform-*d*) δ 166.50 (d, *J* = 21.4 Hz), 152.86 (d, *J* = 13.7 Hz), 135.65, 133.19 (d, *J* = 10.7 Hz), 130.33, 129.38, 128.18, 127.91, 125.58, 125.56, 125.13, 124.30, 124.26, 122.78 (q, *J* = 272.3 Hz), 94.85, 92.85, 39.81 (d, *J* = 26.6 Hz). <sup>19</sup>F NMR (376 MHz, Chloroform-*d*) δ -62.76 (s, 3F), -162.96 (s, 1F). HPLC conditions: Chiralcel OJ-H column (250 × 4.6 mm), hexane /*i*-PrOH = 95 / 5, 1 mL / min, 254 nm, τR (major) = 8.32 min, τR (minor) = 7.76 min. HRMS Calcd. for [C<sub>23</sub>H<sub>16</sub>F<sub>4</sub>N<sub>2</sub>O+Na]<sup>+</sup> requires *m/z* = 435.1096, found *m/z* = 435.1091.

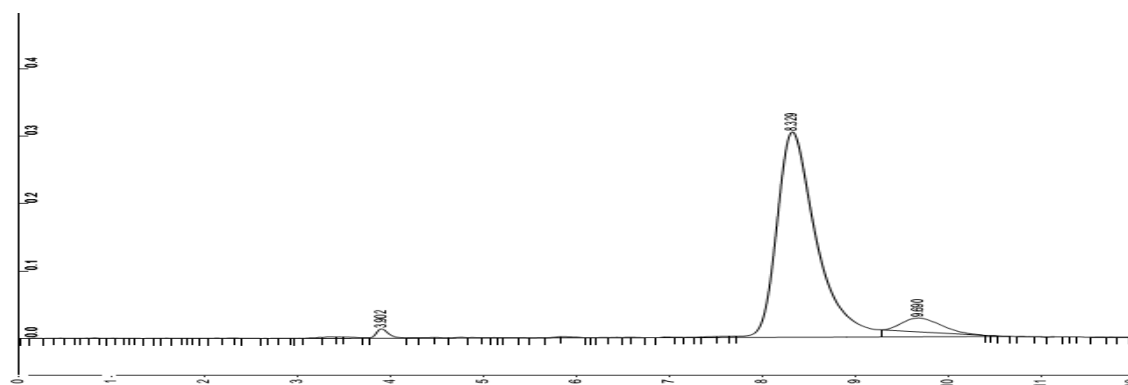

| R.Time       | Area            | Area%          |
|--------------|-----------------|----------------|
| <b>8.329</b> | <b>93651352</b> | <b>93.5294</b> |
| <b>7.766</b> | <b>6488048</b>  | <b>6.4796</b>  |

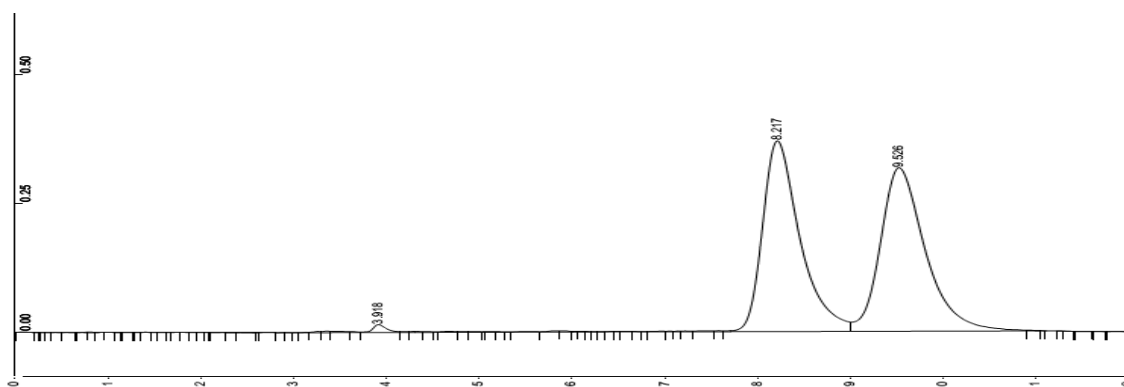

| R.Time       | Area             | Area%          |
|--------------|------------------|----------------|
| <b>8.217</b> | <b>103512536</b> | <b>49.9800</b> |
| <b>9.526</b> | <b>103595379</b> | <b>50.0200</b> |

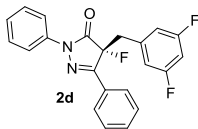

**(R)-4-(3,5-bis(fluoro)benzyl)-4-fluoro-1,3-diphenyl-1H-pyrazol-5(4H)-one (2d).** Yellow solid, m.p. 113-115 °C;  $[\alpha]_D^{25} +65.1$  ( $c$  0.54,  $\text{CHCl}_3$ ); 98% yield, 87% ee.  $^1\text{H}$  NMR (400 MHz, Chloroform- $d$ )  $\delta$  7.93 – 7.83 (m, 2H), 7.80 – 7.66 (m, 2H), 7.61 – 7.48 (m, 3H), 7.45 – 7.33 (m, 2H), 7.25 – 7.17 (m, 1H), 6.61 (tt,  $J$  = 8.8, 2.3 Hz, 1H), 6.52 – 6.30 (m, 2H), 3.70 – 3.37 (m, 2H).  $^{13}\text{C}$  NMR (101 MHz, Chloroform- $d$ )  $\delta$  167.41 (d,  $J$  = 21.3 Hz), 163.86 (d,  $J$  = 12.7 Hz), 161.38 (d,  $J$  = 12.8 Hz), 153.87 (d,  $J$  = 13.7 Hz), 136.72, 133.83, 131.46, 129.26, 128.99, 126.60, 126.58, 126.15, 119.18, 113.02 (d,  $J$  = 25.6 Hz), 103.69 (t,  $J$  = 25.1 Hz), 95.55, 93.55, 40.55 (d,  $J$  = 27.5 Hz).  $^{19}\text{F}$  NMR (376 MHz, Chloroform- $d$ )  $\delta$  -109.16 (s, 2F), -162.68 (s, 1F). HPLC conditions: Chiralcel OJ-H column (250  $\times$  4.6 mm), hexane / *i*-PrOH = 95 / 5, 1 mL / min, 254 nm,  $\tau\text{R}$  (major) = 6.67 min,  $\tau\text{R}$  (minor) = 5.39 min. HRMS Calcd. for  $[\text{C}_{22}\text{H}_{15}\text{F}_3\text{N}_2\text{O}+\text{Na}]^+$  requires  $m/z$  = 403.1034, found  $m/z$  = 403.1038.

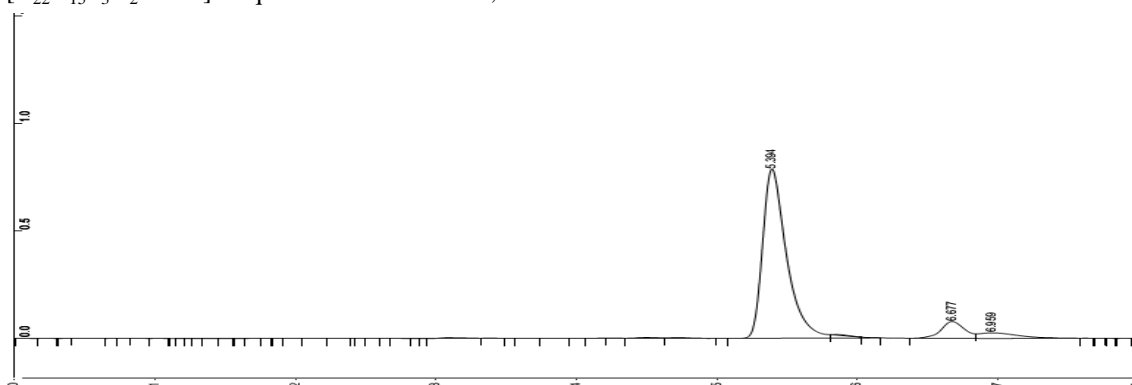

| R.Time       | Area            | Area%          |
|--------------|-----------------|----------------|
| <b>5.394</b> | <b>94438728</b> | <b>93.5120</b> |
| <b>6.677</b> | <b>6552297</b>  | <b>6.4880</b>  |

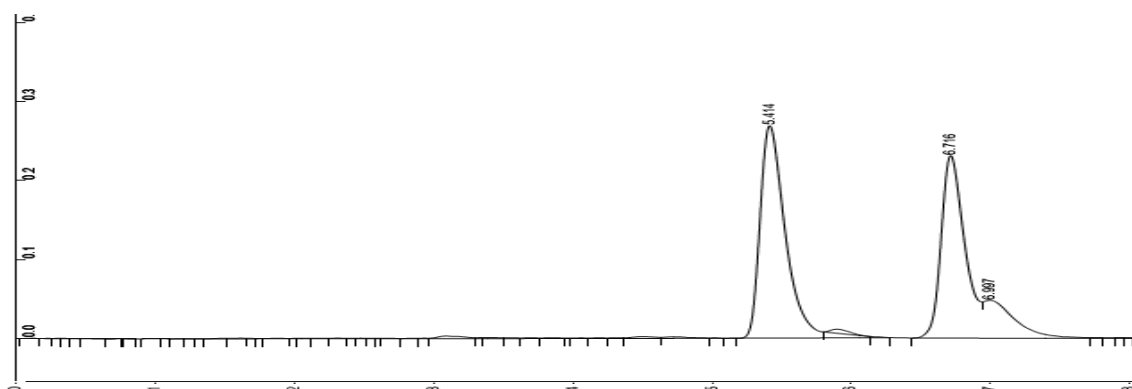

| R.Time       | Area            | Area%          |
|--------------|-----------------|----------------|
| <b>5.414</b> | <b>27228898</b> | <b>49.6595</b> |
| <b>6.716</b> | <b>27602298</b> | <b>50.3405</b> |

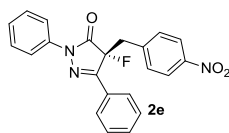

**(R)-4-(4-(nitryl)benzyl)-4-fluoro-1,3-diphenyl-1H-pyrazol-5(4H)-one (2e).**

Light yellow solid, m.p. 117-119 °C;  $[\alpha]_D^{25} +27.6$  ( $c$  0.51,  $\text{CHCl}_3$ ); 97% yield, 80% ee.  $^1\text{H}$  NMR (400 MHz, Chloroform- $d$ )  $\delta$  8.02 – 7.82 (m, 4H), 7.78 – 7.65 (m, 2H), 7.62 – 7.46 (m, 3H), 7.43 – 7.31 (m, 2H), 7.25 – 7.17 (m, 1H), 7.14 – 6.94 (m, 2H), 3.81 – 3.55 (m, 2H).  $^{13}\text{C}$  NMR (101 MHz, Chloroform- $d$ )  $\delta$  167.24 (d,  $J$  = 21.3 Hz), 153.70 (d,  $J$  = 13.8 Hz), 147.62, 137.68, 137.57, 136.61, 131.57, 131.01, 129.32, 129.01, 128.93, 128.92, 126.58, 126.56, 126.22, 123.52, 118.98, 95.55, 93.55, 40.73 (d,  $J$  = 27.2 Hz).  $^{19}\text{F}$  NMR (376 MHz, Chloroform- $d$ )  $\delta$  -162.65 (s, 1F). HPLC conditions: Chiralcel AD-H column (250  $\times$  4.6 mm), hexane / $i$ -PrOH = 90 / 10, 1 mL / min, 254 nm,  $\tau\text{R}$  (major) = 10.02 min,  $\tau\text{R}$  (minor) = 12.02 min. HRMS Calcd. for  $[\text{C}_{22}\text{H}_{16}\text{FN}_3\text{O}_3+\text{Na}]^+$  requires  $m/z$  = 412.1073, found  $m/z$  = 412.1069.

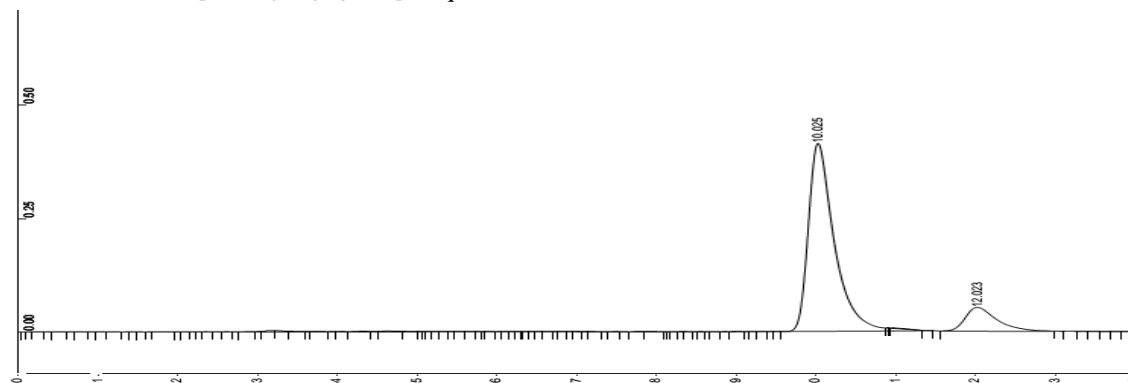

| R.Time        | Area            | Area%          |
|---------------|-----------------|----------------|
| <b>10.025</b> | <b>94021752</b> | <b>89.8744</b> |
| <b>12.023</b> | <b>10592856</b> | <b>10.1256</b> |

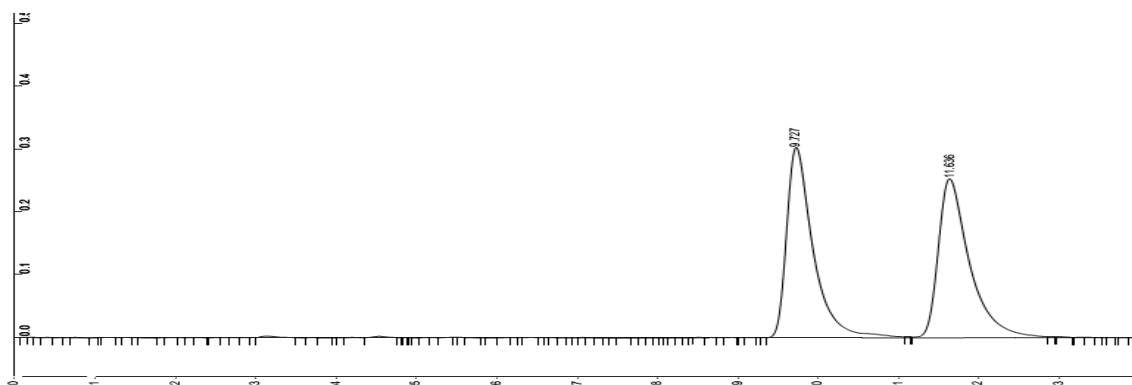

| R.Time        | Area            | Area%          |
|---------------|-----------------|----------------|
| <b>9.727</b>  | <b>69328320</b> | <b>50.3525</b> |
| <b>11.636</b> | <b>68357544</b> | <b>49.6475</b> |

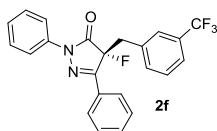

**(R)-4-(3-trifluoromethyl-benzyl)-4-fluoro-1,3-diphenyl-1H-pyrazol-5**

**(4H)-one (2f).** Light yellow oil;  $[\alpha]_D^{25} +110.7$  (*c* 0.58,  $\text{CHCl}_3$ ); 95% yield, 84% ee.  $^1\text{H}$  NMR (400 MHz, Chloroform-*d*)  $\delta$  7.90 – 7.80 (m, 2H), 7.71 – 7.60 (m, 2H), 7.57 – 7.46 (m, 3H), 7.44 – 7.30 (m, 3H), 7.21 (dd, *J* = 8.6, 7.2 Hz, 2H),

7.15 – 7.04 (m, 2H), 3.72 – 3.47 (m, 2H).  $^{13}\text{C}$  NMR (101 MHz, Chloroform-*d*)  $\delta$  167.58 (d, *J* = 21.5 Hz), 153.93 (d, *J* = 13.7 Hz), 136.65, 133.31, 131.39, 131.29 – 130.81 (m), 129.21, 129.16, 129.14, 128.92, 128.90, 126.88 (q, *J* = 3.8 Hz), 126.63, 126.61, 126.09, 125.23 – 124.39 (m), 95.91, 93.91, 40.81 (d, *J* = 26.8 Hz).  $^{19}\text{F}$  NMR (376 MHz, Chloroform-*d*)  $\delta$  -62.90 (s, 3F), -163.34 (s, 1F). HPLC conditions: Chiralcel OJ-H column (250 × 4.6 mm), hexane /*i*-PrOH = 95 / 5, 1 mL / min, 254 nm,  $\tau\text{R}$  (major) = 10.40 min,  $\tau\text{R}$  (minor) = 8.67 min. HRMS Calcd. for  $[\text{C}_{23}\text{H}_{16}\text{F}_4\text{N}_2\text{O}+\text{Na}]^+$  requires *m/z* = 435.1096, found *m/z* = 435.1093.

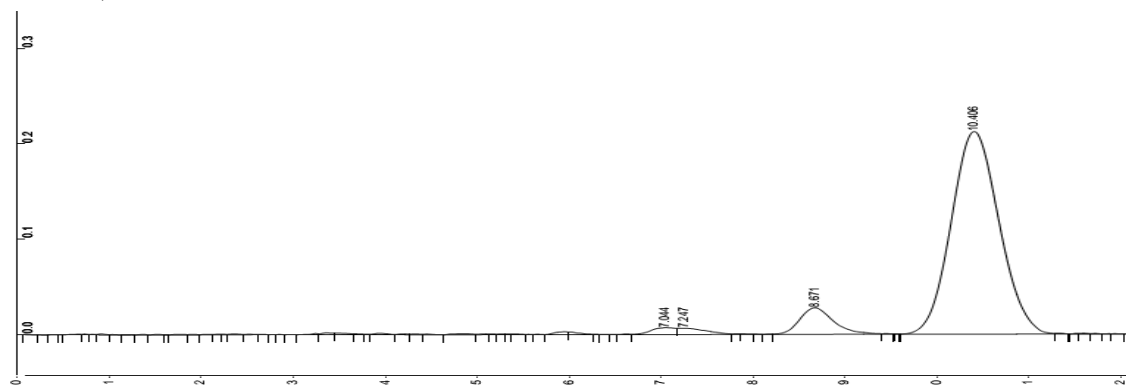

| R.Time        | Area            | Area%          |
|---------------|-----------------|----------------|
| <b>8.671</b>  | <b>7159978</b>  | <b>8.2310</b>  |
| <b>10.406</b> | <b>79827970</b> | <b>91.7690</b> |

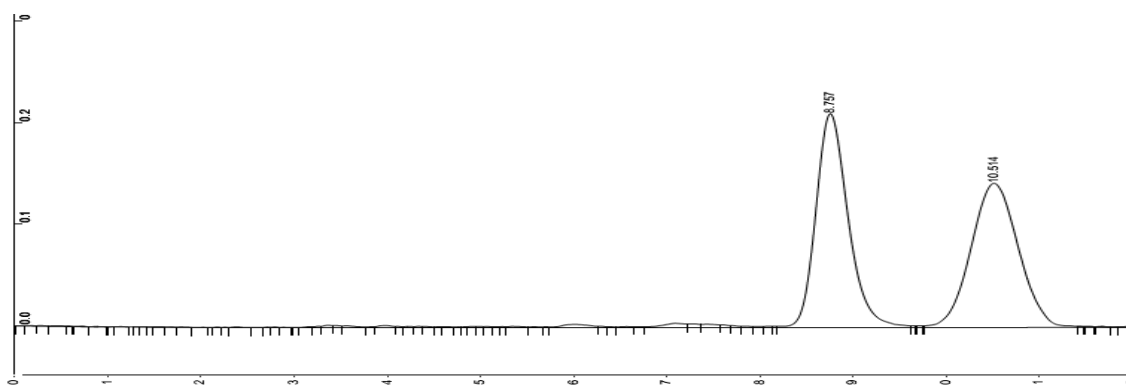

| R.Time        | Area            | Area%          |
|---------------|-----------------|----------------|
| <b>8.757</b>  | <b>50619408</b> | <b>49.7025</b> |
| <b>10.514</b> | <b>51225316</b> | <b>50.2975</b> |

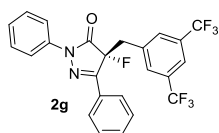

**(R)-4-(3,5-bis(trifluoromethyl)-benzyl)-4-fluoro-1,3-diphenyl-1H-pyrazol-5(4H)-one (2g)**. White solid. m.p. 85-87 °C;  $[\alpha]_D^{25} +46.5$  ( $c$  0.42,  $\text{CHCl}_3$ ); 96% yield, 83% ee.  $^1\text{H}$  NMR (400 MHz, Chloroform- $d$ )  $\delta$  7.81 (dq,  $J = 6.9, 1.2$  Hz, 2H), 7.72 – 7.62 (m, 3H), 7.59 – 7.44 (m, 3H), 7.43 – 7.29 (m, 4H), 7.25 – 7.18 (m, 1H), 3.82 – 3.52 (m, 2H).  $^{13}\text{C}$  NMR (101 MHz, Chloroform- $d$ )  $\delta$  167.19 (d,  $J = 21.4$  Hz), 153.71 (d,  $J = 13.5$  Hz), 136.46, 132.86 (d,  $J = 10.6$  Hz), 131.73 (q,  $J = 33.6$  Hz), 131.65, 130.33, 129.33, 128.98, 126.60, 126.58, 126.28, 122.78 (q,  $J = 272.8$  Hz), 122.04, 122.00, 121.96, 95.41, 93.40, 40.61 (d,  $J = 27.2$  Hz).  $^{19}\text{F}$  NMR (376 MHz, Chloroform- $d$ )  $\delta$  -63.10 (s, 6F), -164.38 (s, 1F). HPLC conditions: Chiralcel AD-H column (250  $\times$  4.6 mm), hexane /  $i$ -PrOH = 98 / 2, 1 mL / min, 254 nm,  $\tau_R$  (major) = 22.00 min,  $\tau_R$  (minor) = 18.38 min. HRMS Calcd. for  $[\text{C}_{24}\text{H}_{15}\text{F}_7\text{N}_2\text{O} + \text{Na}]^+$  requires  $m/z = 503.0970$ , found  $m/z = 503.0968$ .

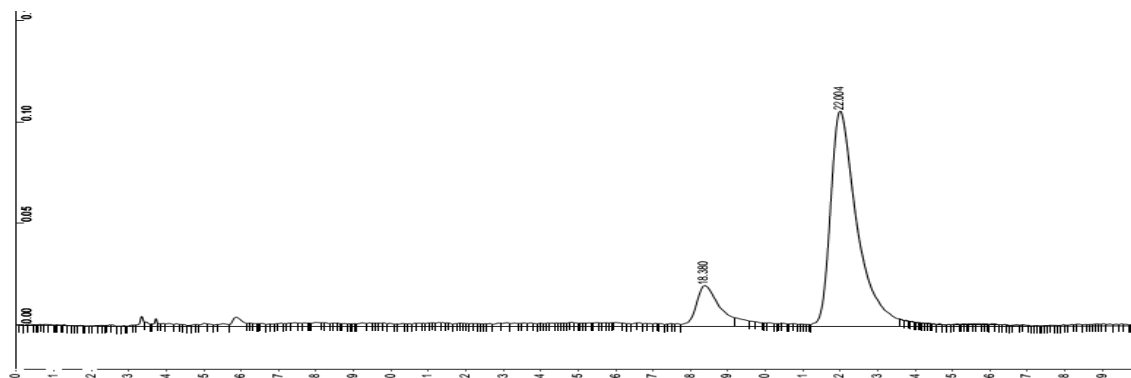

| R.Time | Area      | Area%   |
|--------|-----------|---------|
| 18.380 | 10543245  | 8.9165  |
| 22.004 | 107700965 | 91.0835 |

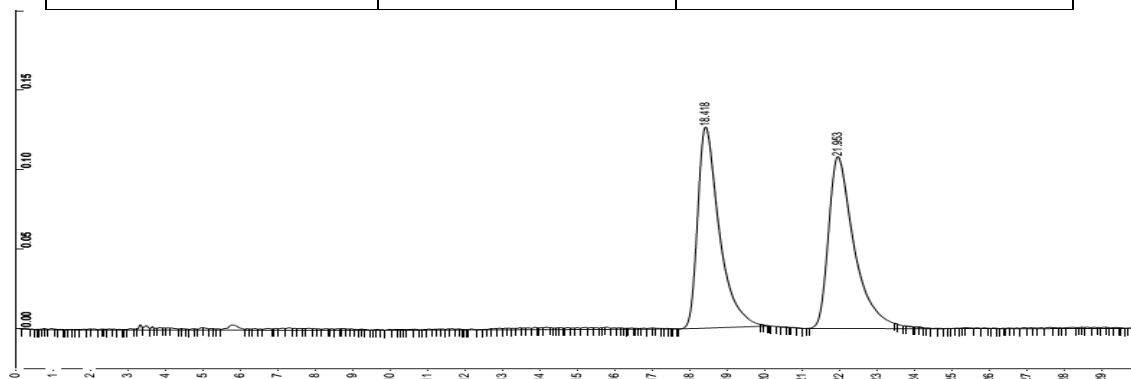

| R.Time | Area     | Area%   |
|--------|----------|---------|
| 18.418 | 50928628 | 49.3875 |
| 21.953 | 52191848 | 50.6125 |

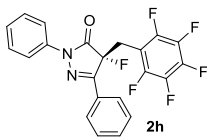

**(R)-4-(2,3,4,5,6-fluorobenzyl)-4-fluoro-1,3-diphenyl-1H-pyrazol-5(4H)-one**

**(2h)**. Light yellow solid, m.p. 165-167 °C;  $[\alpha]_D^{25} +56.7$  (*c* 0.72, CHCl<sub>3</sub>); 96% yield, 87% ee. <sup>1</sup>H NMR (400 MHz, Chloroform-*d*) δ 7.88 – 7.73 (m, 4H), 7.48 – 7.30 (m, 5H), 7.23 – 7.17 (m, 1H), 3.57 (tt, *J* = 15.2, 1.8 Hz, 1H), 3.29 (ddt, *J* =

26.9, 15.1, 1.6 Hz, 1H). <sup>13</sup>C NMR (101 MHz, Chloroform-*d*) δ 165.72 (d, *J* = 22.6 Hz), 153.29 (d, *J* = 13.7 Hz), 153.22, 146.02, 143.59, 143.55, 141.35, 138.81, 137.60, 135.99, 130.45, 128.06, 127.98, 125.60, 125.58, 125.10, 117.98, 104.31 (t, *J* = 18.1 Hz), 92.43, 90.40, 28.68, 27.29 (d, *J* = 26.7 Hz). <sup>19</sup>F NMR (376 MHz, Chloroform-*d*) δ -139.19 – -139.75 (m, 2F), -153.43 (t, *J* = 20.8 Hz, 1F), -161.83 (dd, *J* = 21.0, 14.2 Hz, 2F), -170.79 (t, *J* = 10.5 Hz, 1F). HPLC conditions: Chiralcel AD-H column (250 × 4.6 mm), hexane /*i*-PrOH = 90 / 10, 1 mL / min, 254 nm, τR (major) = 5.04 min, τR (minor) = 5.54 min. HRMS Calcd. for [C<sub>22</sub>H<sub>12</sub>F<sub>6</sub>N<sub>2</sub>O+H]<sup>+</sup> requires *m/z* = 435.0932, found *m/z* = 435.0931.

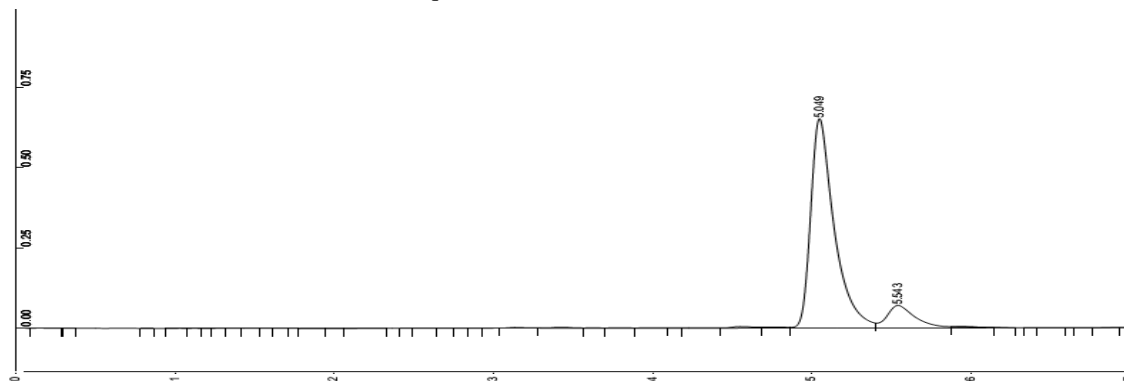

| R.Time       | Area            | Area%          |
|--------------|-----------------|----------------|
| <b>5.049</b> | <b>67048160</b> | <b>91.5148</b> |
| <b>5.543</b> | <b>6216667</b>  | <b>8.4852</b>  |

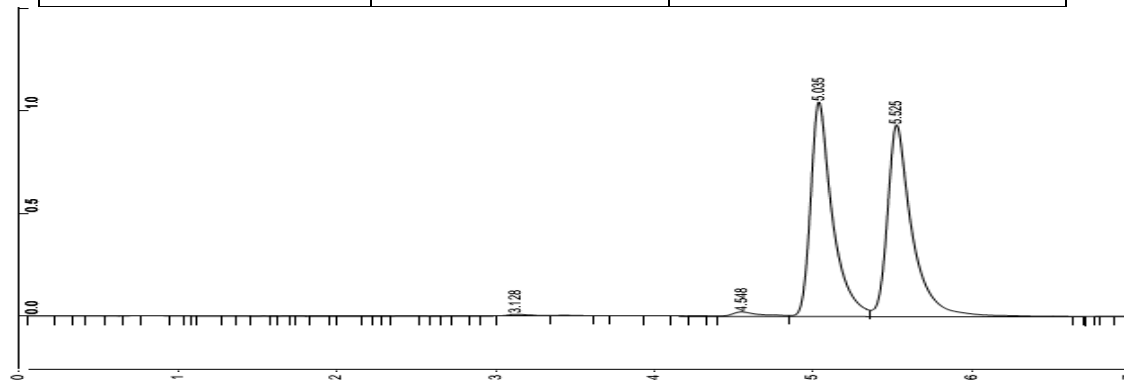

| R.Time       | Area             | Area%          |
|--------------|------------------|----------------|
| <b>5.035</b> | <b>993606632</b> | <b>49.9252</b> |
| <b>5.525</b> | <b>996583957</b> | <b>50.0748</b> |

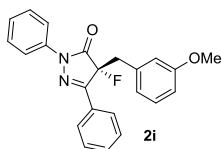

**(R)-4-(3-methoxybenzyl)-4-fluoro-1,3-diphenyl-1H-pyrazol-5 (4H)-one**

**(2i).** Light yellow wax,  $[\alpha]_D^{25} +48.2$  (*c* 0.41,  $\text{CHCl}_3$ ); 99% yield, 92% ee.  $^1\text{H}$  NMR (400 MHz, Chloroform-*d*)  $\delta$  7.95 – 7.86 (m, 2H), 7.74 – 7.62 (m, 2H), 7.57 – 7.46 (m, 3H), 7.40 – 7.33 (m, 2H), 7.20 (t, *J* = 7.4 Hz, 1H), 7.00 (t, *J* = 7.9 Hz, 1H), 6.67 (ddd, *J* = 8.3, 2.6, 0.9 Hz, 1H), 6.49 (dt, *J* = 7.5, 1.2 Hz, 1H),

6.38 (t, *J* = 2.1 Hz, 1H), 3.69 – 3.51 (m, 2H), 3.49 (s, 3H).  $^{13}\text{C}$  NMR (101 MHz, Chloroform-*d*)  $\delta$  168.05 (d, *J* = 21.5 Hz), 159.39, 154.19 (d, *J* = 13.8 Hz), 136.93, 131.32, 131.20, 131.14, 129.53, 129.52, 129.42, 129.10, 128.88, 126.69, 126.68, 125.92, 122.23, 119.30, 114.59, 114.42, 96.28, 94.29, 54.92, 41.21 (d, *J* = 26.3 Hz).  $^{19}\text{F}$  NMR (376 MHz, Chloroform-*d*)  $\delta$  -162.10 (s, 1F). HPLC conditions: Chiralcel OJ-H column (250 × 4.6 mm), hexane /*i*-PrOH = 80 / 20, 1 mL / min, 254 nm,  $\tau\text{R}$  (major) = 8.86 min,  $\tau\text{R}$  (minor) = 13.25 min. HRMS Calcd. for  $[\text{C}_{23}\text{H}_{19}\text{FN}_2\text{O}_2+\text{H}]^+$  requires  $m/z$  = 375.1509, found  $m/z$  = 375.1507.

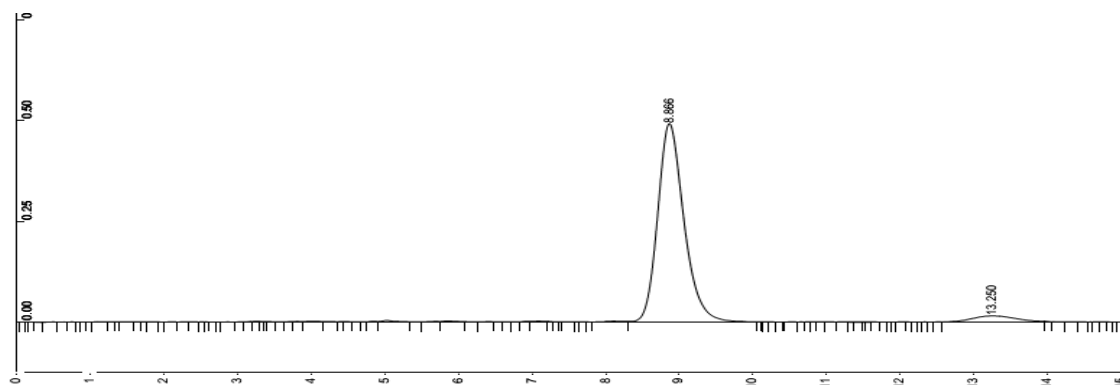

| R.Time | Area      | Area%   |
|--------|-----------|---------|
| 8.866  | 122565072 | 96.0405 |
| 13.250 | 5053039   | 3.9595  |

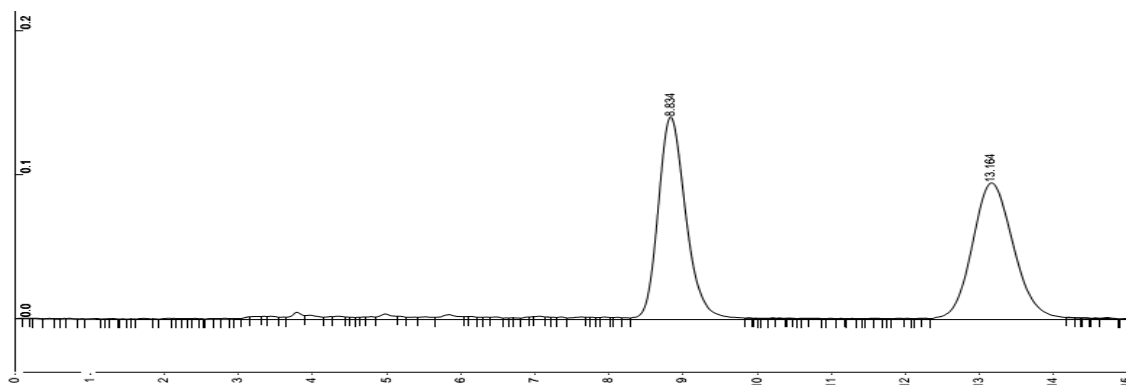

| R.Time | Area     | Area%   |
|--------|----------|---------|
| 8.834  | 37205960 | 50.1683 |
| 13.164 | 36956388 | 49.8317 |

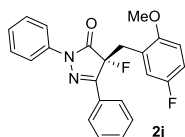

**(R)-4-(2-methoxy,5-fluorobenzyl)-4-fluoro-1,3-diphenyl-1H-pyrazol-5(4H)-one (2j).** White solid, m.p. 86-89 °C;  $[\alpha]_D^{25} +56.7$  (*c* 0.42, CHCl<sub>3</sub>); 98% yield, 92% ee. <sup>1</sup>H NMR (400 MHz, Chloroform-*d*) δ 7.72 (dq, *J* = 8.4, 1.5 Hz, 4H), 7.40 – 7.24 (m, 5H), 7.17 – 7.06 (m, 1H), 6.89 – 6.63 (m, 2H), 6.38 (dd, *J* = 9.0, 4.4 Hz, 1H), 3.72 – 3.27 (m, 2H), 3.09 (s, 3H). <sup>13</sup>C NMR (101 MHz, Chloroform-*d*) δ 167.19 (d, *J* = 21.8 Hz), 155.19 – 153.34 (m), 152.72, 152.70, 136.12, 128.70, 128.68, 127.88, 127.44, 125.45, 125.43, 124.73, 119.58, 117.97, 117.64 (d, *J* = 23.6 Hz), 114.14 (d, *J* = 22.7 Hz), 109.48 (d, *J* = 8.4 Hz), 94.88, 92.89, 53.74, 34.19 (d, *J* = 27.1 Hz). <sup>19</sup>F NMR (376 MHz, Chloroform-*d*) δ -124.15 (s, 1F), -164.47(s, 1F). HPLC conditions: Chiralcel OJ-H column (250 × 4.6 mm), hexane /*i*-PrOH = 95 / 5, 1 mL / min, 254 nm, τ<sub>R</sub> (major) = 17.41 min, τ<sub>R</sub> (minor) = 16.05 min. HRMS Calcd. for [C<sub>23</sub>H<sub>18</sub>F<sub>2</sub>N<sub>2</sub>O<sub>2</sub>+Na]<sup>+</sup> requires *m/z* = 415.1234, found *m/z* = 415.1231.

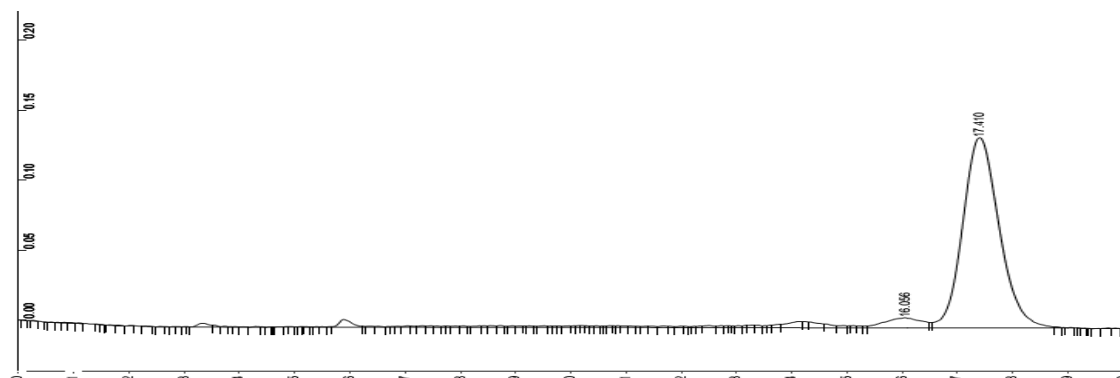

| R.Time | Area     | Area%   |
|--------|----------|---------|
| 16.056 | 3236348  | 4.1352  |
| 17.410 | 75027049 | 95.8648 |

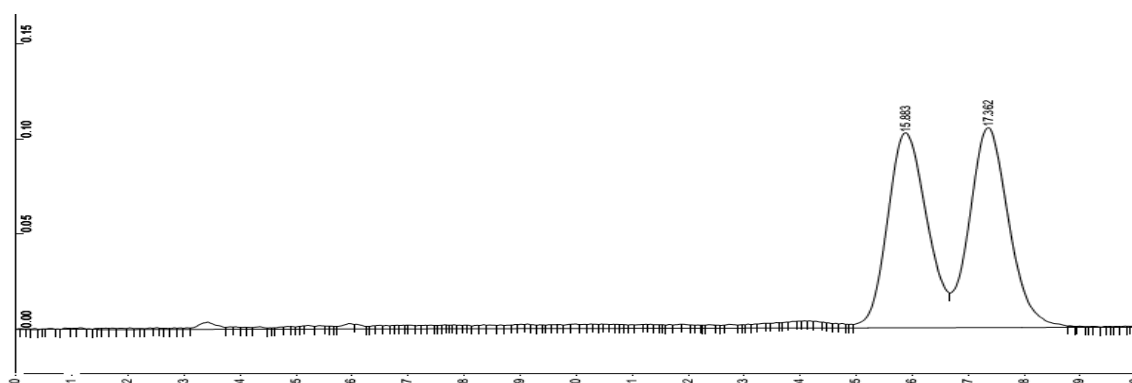

| R.Time | Area     | Area%   |
|--------|----------|---------|
| 15.883 | 50159428 | 49.3827 |
| 17.362 | 51413432 | 50.6173 |



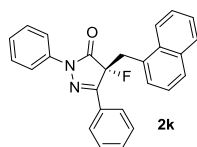

**(R)-4-(naphthalen-2-methylene)-4-fluoro-1,3-diphenyl-1H-pyrazol-5(4H)-one**

**(2k)**. Colourless oil;  $[\alpha]_D^{25} +112.3$  ( $c$  0.42,  $\text{CHCl}_3$ ); 99% yield, 90% ee.  $^1\text{H}$  NMR (400 MHz, Chloroform- $d$ )  $\delta$  7.78 (d,  $J = 8.5$  Hz, 1H), 7.75 – 7.62 (m, 4H), 7.59 – 7.50 (m, 2H), 7.47 – 7.38 (m, 1H), 7.39 – 7.29 (m, 5H), 7.25 – 7.21 (m, 1H), 7.21 – 7.11 (m, 3H), 4.10 – 3.95 (m, 2H).  $^{13}\text{C}$  NMR (101 MHz, Chloroform- $d$ )  $\delta$  168.52

(d,  $J = 21.8$  Hz), 154.84 (d,  $J = 13.9$  Hz), 136.85, 133.63, 132.02, 130.92, 129.68, 129.66, 129.20, 128.82, 128.76, 128.53, 126.76, 126.67, 126.65, 125.87, 125.86, 125.60, 124.82, 123.64, 119.24, 96.54, 94.55, 37.30 (d,  $J = 26.4$  Hz).  $^{19}\text{F}$  NMR (376 MHz, Chloroform- $d$ )  $\delta$  -163.17 (s, 1F). HPLC conditions: Chiralcel OJ-H column (250  $\times$  4.6 mm), hexane / $i$ -PrOH = 90 / 10, 1 mL / min, 254 nm,  $\tau_R$  (major) = 15.19 min,  $\tau_R$  (minor) = 12.76 min. HRMS Calcd. for  $[\text{C}_{26}\text{H}_{19}\text{FN}_2\text{O}+\text{Na}]^+$  requires  $m/z = 417.1379$ , found  $m/z = 417.1382$ .

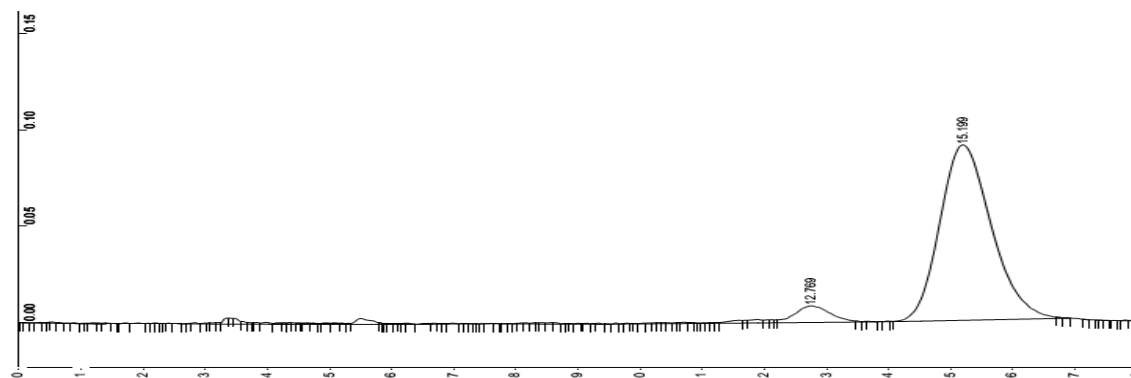

| R.Time | Area     | Area%   |
|--------|----------|---------|
| 12.769 | 3351168  | 5.0038  |
| 15.199 | 63621293 | 94.9962 |

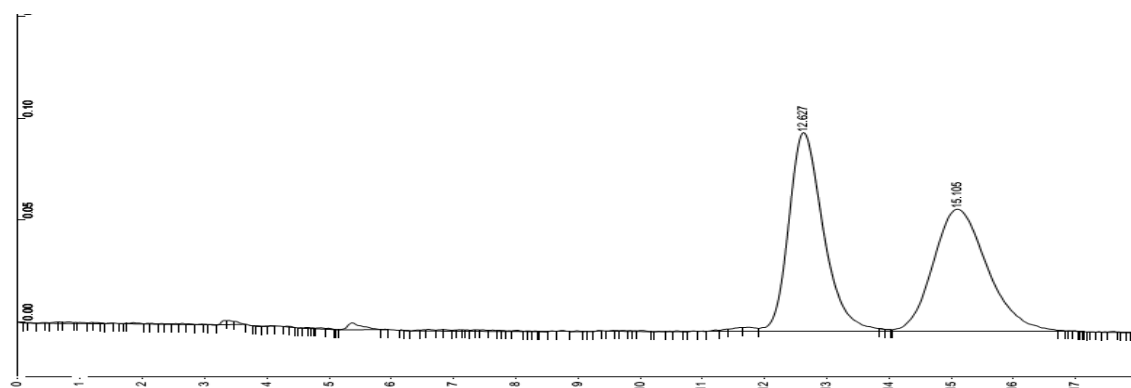

| R.Time | Area     | Area%   |
|--------|----------|---------|
| 12.627 | 33979232 | 50.8720 |
| 15.105 | 36677300 | 49.1281 |

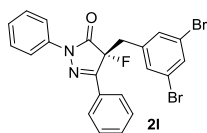

**(R)-4-(3,5-bis(bromo) benzyl)-4-fluoro-1,3-diphenyl-1H-pyrazol-5 (4H)-one (21).** White solid, m.p. 103-105 °C;  $[\alpha]_D^{25} +53.8$  (*c* 0.62, CHCl<sub>3</sub>); 98% yield, 90% ee. <sup>1</sup>H NMR (400 MHz, Chloroform-*d*) δ 7.82 – 7.70 (m, 2H), 7.67 – 7.58 (m, 2H), 7.51 – 7.40 (m, 3H), 7.39 – 7.26 (m, 3H), 7.18 – 7.12 (m, 1H), 6.90 (d, *J* = 1.7 Hz, 2H), 3.53 – 3.25 (m, 2H). <sup>13</sup>C NMR (101 MHz, Chloroform-*d*) δ 166.40 (d, *J* = 21.5 Hz), 152.85 (d, *J* = 13.6 Hz), 135.52, 132.91, 132.81, 132.68, 130.78, 130.46, 128.22, 128.07, 128.06, 127.96, 125.60, 125.58, 125.23, 121.68, 118.42, 94.52, 92.51, 39.14 (d, *J* = 27.0 Hz). <sup>19</sup>F NMR (376 MHz, Chloroform-*d*) δ -163.81(s, 1F). HPLC conditions: Chiralcel AD-H column (250 × 4.6 mm), hexane /*i*-PrOH = 80 / 20, 1 mL / min, 254 nm, τR (major) = 4.51 min, τR (minor) = 5.43 min. HRMS Calcd. for [C<sub>22</sub>H<sub>15</sub>Br<sub>2</sub>FN<sub>2</sub>O+Na]<sup>+</sup> requires *m/z* = 522.9433, found *m/z* = 522.9439.

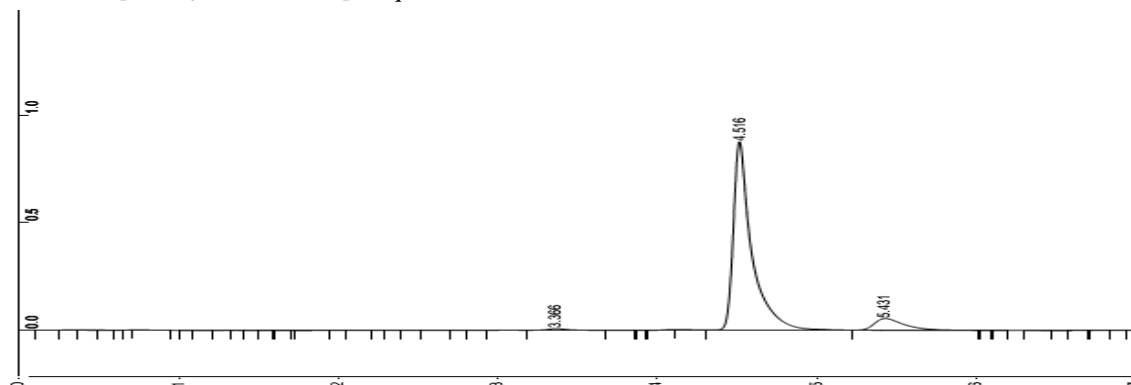

| R.Time       | Area            | Area%          |
|--------------|-----------------|----------------|
| <b>4.516</b> | <b>71101400</b> | <b>94.8205</b> |
| <b>5.431</b> | <b>3883861</b>  | <b>5.1795</b>  |

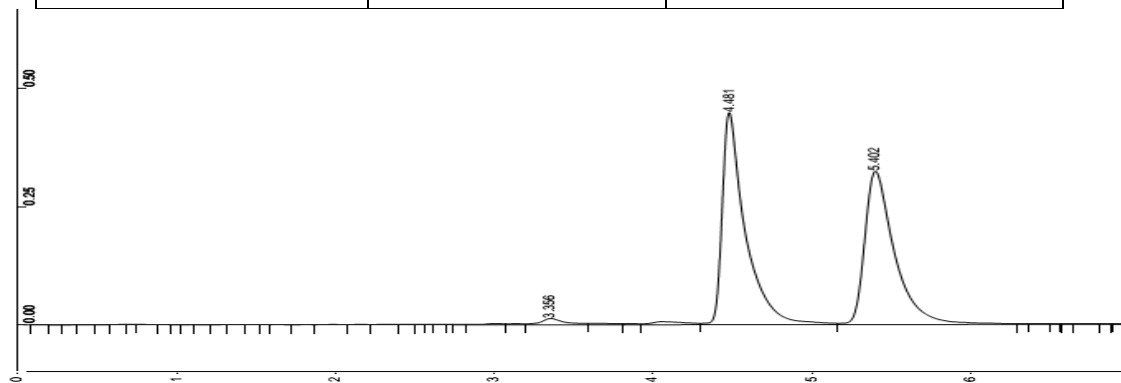

| R.Time       | Area            | Area%          |
|--------------|-----------------|----------------|
| <b>4.481</b> | <b>45264252</b> | <b>50.1031</b> |
| <b>5.402</b> | <b>45077966</b> | <b>49.8969</b> |

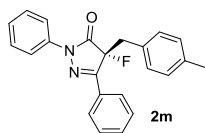

**(R)-4-(4-methyl benzyl)-4-fluoro-1,3-diphenyl-1H-pyrazol-5 (4H)-one.** Brown solid, m.p. 104-106 °C;  $[\alpha]_D^{25} +48.2$  ( $c$  0.40,  $\text{CHCl}_3$ ); 98% yield, 90% ee.  $^1\text{H}$  NMR (400 MHz, Chloroform- $d$ )  $\delta$  7.87 – 7.77 (m, 2H), 7.65 – 7.54 (m, 2H), 7.48 – 7.37 (m, 3H), 7.33 – 7.23 (m, 2H), 7.14 – 7.04 (m, 1H), 6.81 (d,  $J$  = 7.8 Hz, 2H), 6.74 – 6.64 (m, 2H), 3.68 – 3.30 (m, 2H), 2.10 (s, 3H).  $^{13}\text{C}$  NMR (101 MHz, Chloroform- $d$ )  $\delta$  168.14 (d,  $J$  = 21.5 Hz), 154.24 (d,  $J$  = 13.9 Hz), 137.63, 136.96, 131.13, 129.80, 129.49, 129.14, 129.11, 128.86, 126.71, 126.69, 126.60, 125.90, 119.39, 96.39, 94.41, 40.71 (d,  $J$  = 26.0 Hz), 21.07.  $^{19}\text{F}$  NMR (376 MHz, Chloroform- $d$ )  $\delta$  -161.89 (s, 1F). HPLC conditions: Chiralcel AD-H column (250  $\times$  4.6 mm), hexane / $i$ -PrOH = 98 / 2, 1 mL / min, 254 nm,  $\tau_R$  (major) = 9.65 min,  $\tau_R$  (minor) = 8.49 min. HRMS Calcd. for  $[\text{C}_{23}\text{H}_{19}\text{FN}_2\text{O}+\text{Na}]^+$  requires  $m/z$  = 381.1379, found  $m/z$  = 381.1374.

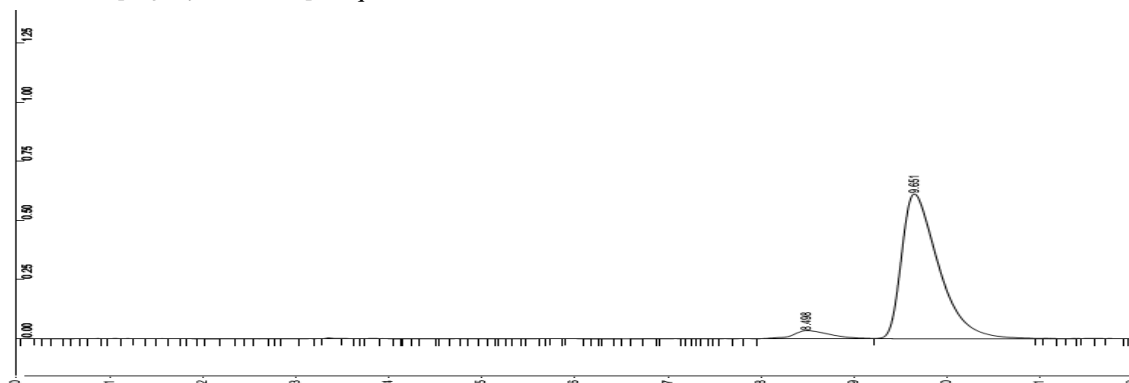

| R.Time | Area     | Area%   |
|--------|----------|---------|
| 8.498  | 6773943  | 4.4512  |
| 9.651  | 14466760 | 95.5488 |

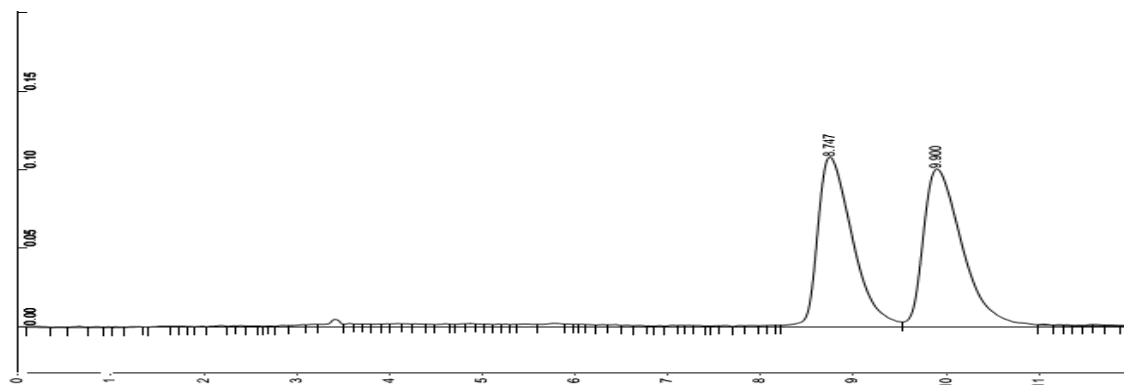

| R.Time  | Area     | Area%   |
|---------|----------|---------|
| 46.1073 | 28154166 | 46.1073 |
| 53.8926 | 32908040 | 53.8926 |

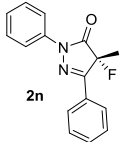

**(R)-4-fluoro-4-methyl-1,3-diphenyl-1H-pyrazol-5(4H)-one (2n).** Light yellow solid, m.p. 80-82 °C;  $[\alpha]_D^{25} +27.4$  (*c* 0.38, CHCl<sub>3</sub>); 99% yield, 92% ee. <sup>1</sup>H NMR (400 MHz, Chloroform-*d*)  $\delta$  7.98 (tdd, *J* = 6.3, 2.9, 1.1 Hz, 4H), 7.57 – 7.36 (m, 5H), 7.30 – 7.20 (m, 1H), 1.88 (d, *J* = 22.6 Hz, 3H). <sup>13</sup>C NMR (101 MHz, Chloroform-*d*)  $\delta$  168.65 (d, *J* = 22.0 Hz), 155.61 (d, *J* = 14.5 Hz), 137.42, 131.26, 129.05, 129.01, 128.54, 128.53, 126.69, 126.67, 125.77, 118.80, 93.70, 91.77, 29.70, 21.42 (d, *J* = 26.5 Hz). <sup>19</sup>F NMR (376 MHz, Chloroform-*d*)  $\delta$  -163.74 (s, 1H). HPLC conditions: Chiralcel AD-H column (250 × 4.6 mm), hexane /*i*-PrOH = 98 / 2, 0.8 mL / min, 254 nm,  $\tau$ R (major) = 11.02 min,  $\tau$ R (minor) = 8.59 min. HRMS Calcd. for [C<sub>16</sub>H<sub>13</sub>FN<sub>2</sub>O+Na]<sup>+</sup> requires *m/z* = 291.0910, found *m/z* = 291.0916.

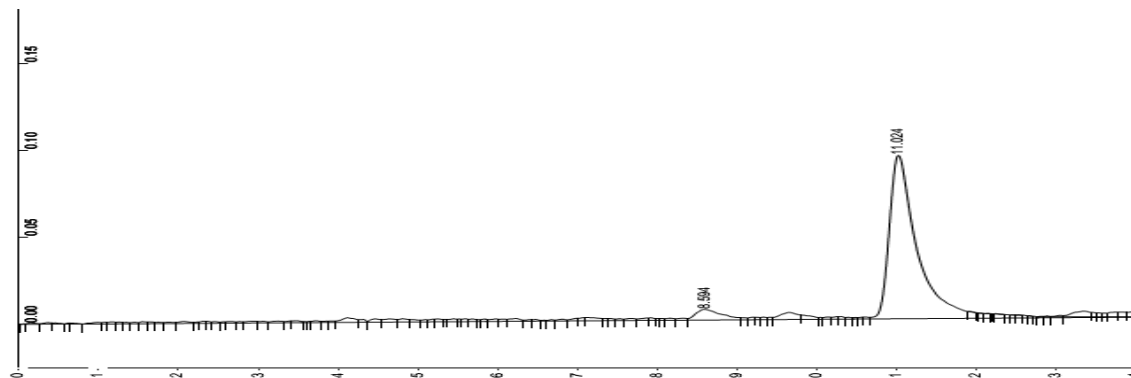

| R.Time        | Area           | Area%          |
|---------------|----------------|----------------|
| <b>8.594</b>  | <b>1338913</b> | <b>4.0330</b>  |
| <b>11.024</b> | <b>3186020</b> | <b>95.9670</b> |

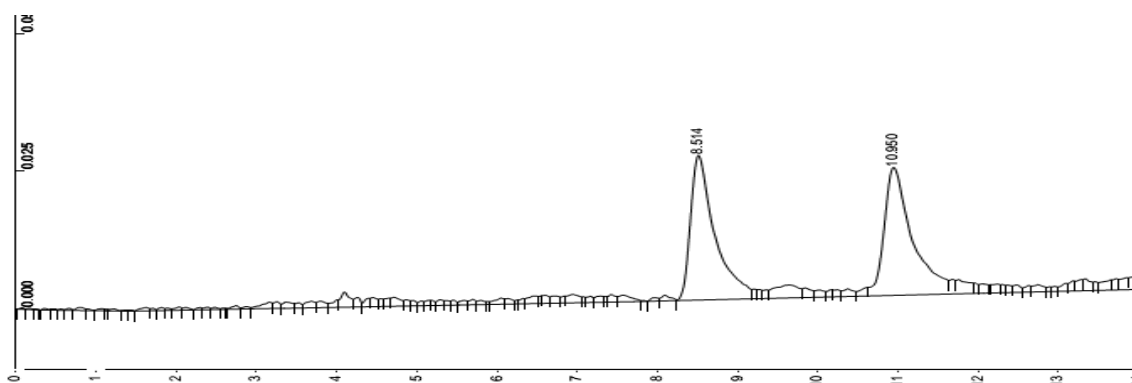

| R.Time        | Area           | Area%          |
|---------------|----------------|----------------|
| <b>8.514</b>  | <b>5533149</b> | <b>49.6385</b> |
| <b>10.950</b> | <b>5613752</b> | <b>50.3615</b> |

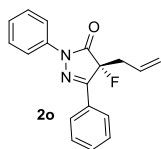

**(R)-4-fluoro-4-allyl-1,3-diphenyl-1H-pyrazol-5(4H)-one (2o).** Colorless oil;  $[\alpha]_D^{25} +64.5$  ( $c$  0.31,  $\text{CHCl}_3$ ); 92% yield, 94% ee.  $^1\text{H}$  NMR (400 MHz, Chloroform- $d$ )  $\delta$  8.03 – 7.82 (m, 4H), 7.56 – 7.38 (m, 5H), 7.24 (d,  $J = 7.5$  Hz, 1H), 5.54 – 5.32 (m, 1H), 5.22 – 4.92 (m, 2H), 3.18 – 2.89 (m, 2H).  $^{13}\text{C}$  NMR (101 MHz, Chloroform- $d$ )  $\delta$  167.90 (d,  $J = 21.7$  Hz), 154.26 (d,  $J = 13.9$  Hz), 137.23, 131.23, 129.06, 128.99, 128.94, 126.63, 126.62, 126.37, 126.26, 125.82, 122.71, 118.94, 95.41, 93.43, 39.16 (d,  $J = 26.1$  Hz).  $^{19}\text{F}$  NMR (376 MHz, Chloroform- $d$ )  $\delta$  -164.30 (s, 1F). HPLC conditions: Chiralcel AD-H column (250  $\times$  4.6 mm), hexane / $i$ -PrOH = 90 / 10, 1 mL / min, 254 nm,  $\tau_R$  (major) = 5.54 min,  $\tau_R$  (minor) = 4.95 min. HRMS Calcd. for  $[\text{C}_{18}\text{H}_{15}\text{FN}_2\text{O}+\text{Na}]^+$  requires  $m/z = 317.1066$ , found  $m/z = 317.1062$ .

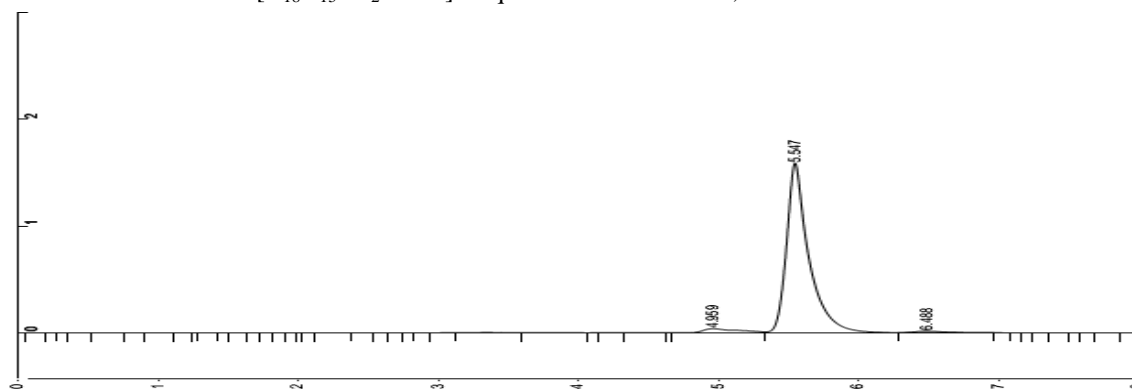

| R.Time | Area      | Area%   |
|--------|-----------|---------|
| 4.959  | 7189615   | 3.0152  |
| 5.547  | 231256093 | 96.9848 |

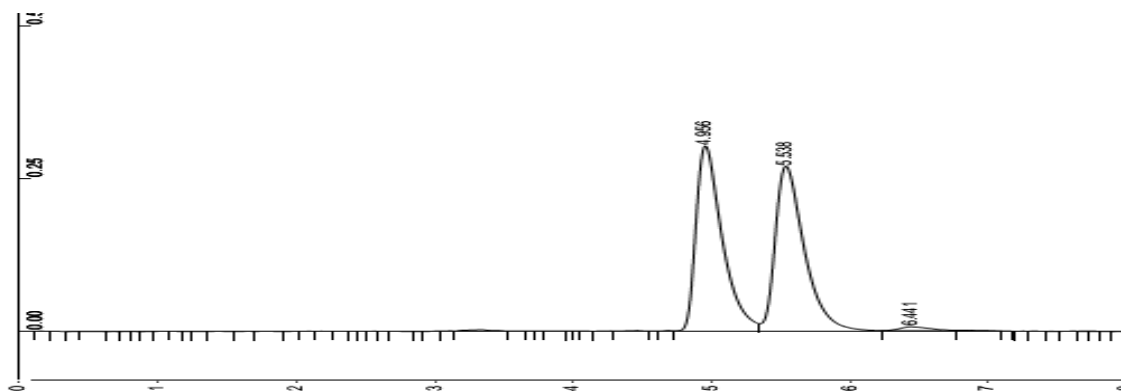

| R.Time | Area     | Area%   |
|--------|----------|---------|
| 4.956  | 40182424 | 49.1460 |
| 5.538  | 40569900 | 50.8540 |

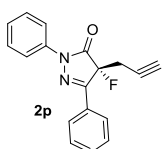

**(R)-4-fluoro-4-propargyl-1,3-diphenyl-1H-pyrazol-5(4H)-one (2p).** Colorless oil;  $[\alpha]_D^{25} +57.3$  (*c* 0.25,  $\text{CHCl}_3$ ); 94% yield, 89% ee.  $^1\text{H}$  NMR (400 MHz, Chloroform-*d*)  $\delta$  7.95 (ddt,  $J = 15.4, 7.9, 1.2$  Hz, 4H), 7.58 – 7.39 (m, 5H), 7.30 – 7.26 (m, 1H), 3.27 (ddd,  $J = 15.8, 8.1, 2.8$  Hz, 1H), 3.12 (ddd,  $J = 15.8, 7.5, 2.8$  Hz, 1H), 1.93 (t,  $J = 2.7$  Hz, 1H).  $^{13}\text{C}$  NMR (101 MHz, Chloroform-*d*)  $\delta$  165.82 (d,  $J = 21.0$  Hz), 152.35 (d,  $J = 13.4$  Hz), 136.08, 130.33, 128.07, 127.99, 127.56, 127.54, 125.56, 125.54, 124.94, 118.04, 92.99, 91.00, 72.12 (d,  $J = 19.0$  Hz), 71.90 (d,  $J = 2.6$  Hz), 24.30 (d,  $J = 34.1$  Hz).  $^{19}\text{F}$  NMR (376 MHz, Chloroform-*d*)  $\delta$  -164.40 (s, 1F). HPLC conditions: Chiralcel AD-H column (250  $\times$  4.6 mm), hexane /*i*-PrOH = 80 / 20, 1 mL / min, 254 nm,  $\tau_R$  (major) = 7.73 min,  $\tau_R$  (minor) = 6.93 min. HRMS Calcd. for  $[\text{C}_{18}\text{H}_{13}\text{FN}_2\text{O}+\text{Na}]^+$  requires  $m/z = 315.0910$ , found  $m/z = 315.0914$ .

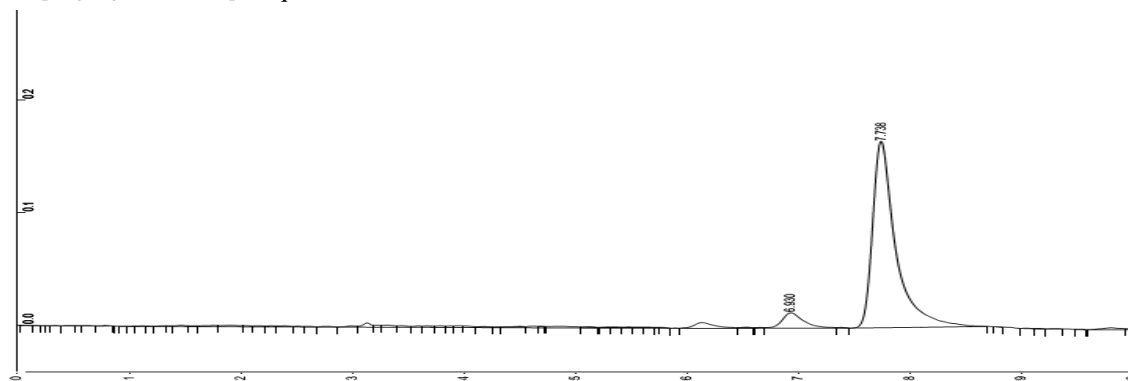

| R.Time | Area     | Area%   |
|--------|----------|---------|
| 6.930  | 1801908  | 5.2195  |
| 7.738  | 32720709 | 94.7805 |

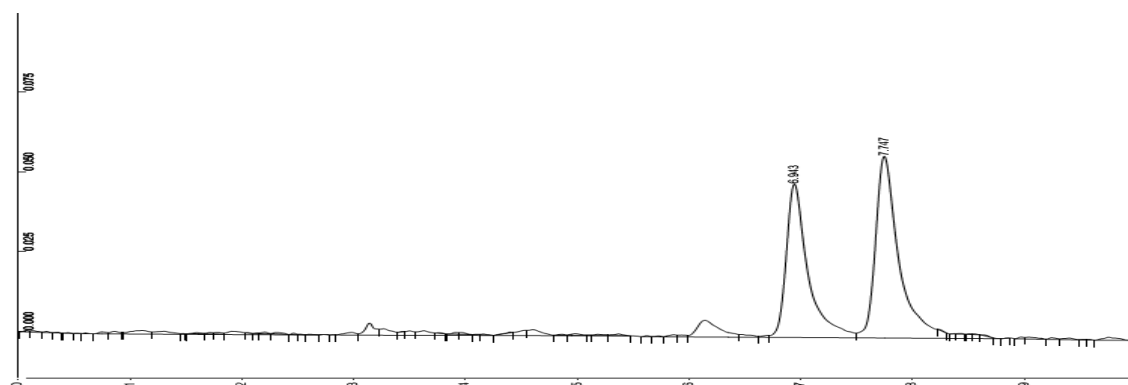

| R.Time | Area    | Area%   |
|--------|---------|---------|
| 6.943  | 6479264 | 48.1015 |
| 7.747  | 6990719 | 51.8985 |

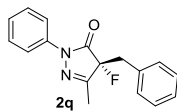

**(R)-4-benzyl-4-fluoro-3-methyl-1-phenyl-1H-pyrazol-5(4H)-one (2q).** Colorless oil;  $[\alpha]_D^{25} +29.6$  ( $c$  0.21,  $\text{CHCl}_3$ ); 95% yield, 72% ee.  $^1\text{H}$  NMR (400 MHz, Chloroform- $d$ )  $\delta$  7.67 – 7.59 (m, 2H), 7.40 – 7.30 (m, 2H), 7.29 – 7.23 (m, 3H), 7.21 – 7.12 (m, 3H), 3.65 – 3.10 (m, 2H), 2.14 (d,  $J$  = 1.6 Hz, 3H).  $^{13}\text{C}$  NMR (101 MHz, Chloroform- $d$ )  $\delta$  136.97, 130.65, 130.55, 129.76, 128.87, 128.77, 128.06, 125.65, 118.96, 95.52, 93.56, 13.83.  $^{13}\text{C}$  NMR (101 MHz, Chloroform- $d$ )  $\delta$  167.79 (d,  $J$  = 21.0 Hz), 157.01 (d,  $J$  = 16.4 Hz), 39.41 (d,  $J$  = 26.1 Hz).  $^{19}\text{F}$  NMR (376 MHz, Chloroform- $d$ )  $\delta$  -167.08 (s, 1F). HPLC conditions: Chiralcel AD-H column (250  $\times$  4.6 mm), hexane /*i*-PrOH = 99 / 1, 1 mL / min, 254 nm,  $\tau\text{R}$  (major) = 16.00 min,  $\tau\text{R}$  (minor) = 13.90 min. HRMS Calcd. for  $[\text{C}_{17}\text{H}_{15}\text{FN}_2\text{O}+\text{Na}]^+$  requires  $m/z$  = 305.1066, found  $m/z$  = 315.305.1071.

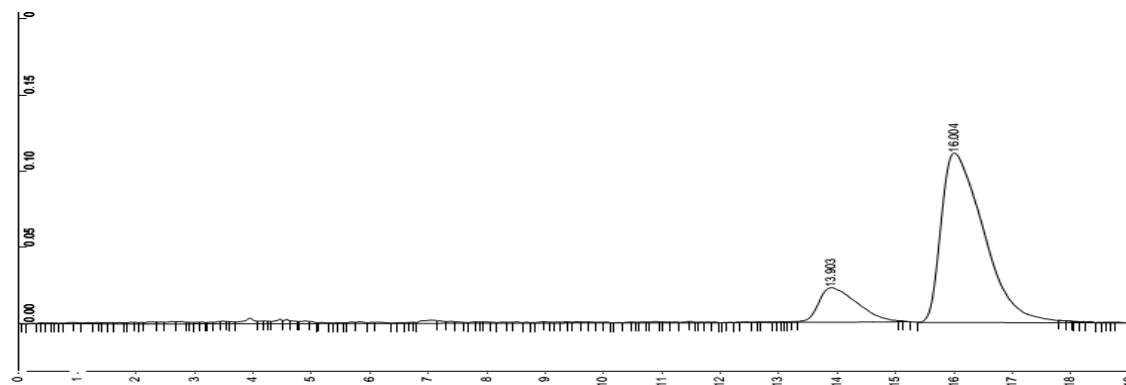

| R.Time | Area    | Area%    |
|--------|---------|----------|
| 13.903 | 14.0058 | 10334163 |
| 16.004 | 85.9942 | 63450719 |

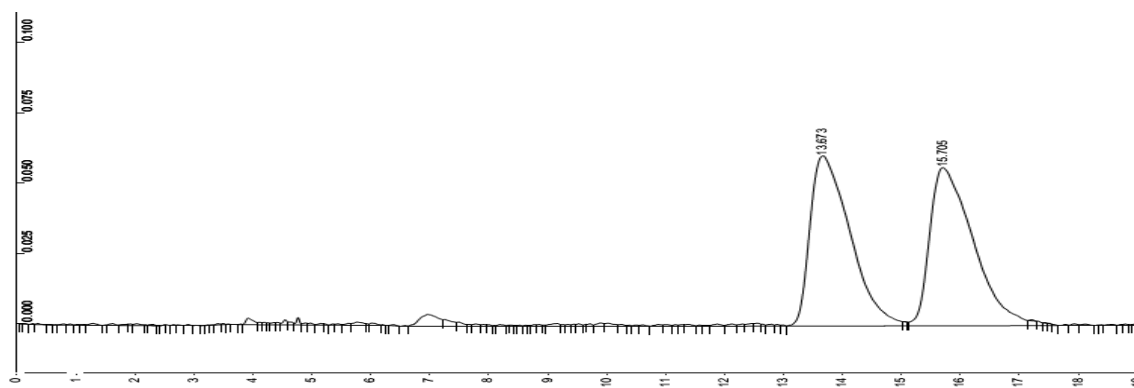

| R.Time | Area     | Area%   |
|--------|----------|---------|
| 13.673 | 28569898 | 49.6354 |
| 15.705 | 28989670 | 50.3646 |

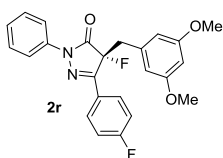

**(R)-3-(4-fluorophenyl)-4-(3,5-bis(methoxy)benzyl)-4-hydroxy-1-phenyl-1H-pyrazol-5(4H)-one (2r).** White solid, m.p. 131-133 °C;  $[\alpha]_D^{25} +79.5$  (*c* 0.41, CHCl<sub>3</sub>); 99% yield, 92% ee. <sup>1</sup>H NMR (400 MHz, Chloroform-*d*) δ 7.76 – 7.65 (m, 3H), 7.59 (dt, *J* = 9.6, 2.1 Hz, 1H), 7.48 (td, *J* = 8.1, 5.7 Hz, 1H), 7.39 (dd, *J* = 8.6, 7.4 Hz, 2H), 7.25 – 7.18 (m, 2H), 6.23 (t, *J* = 2.3 Hz, 1H), 6.01 (d, *J* = 2.3 Hz, 2H), 3.71 – 3.32 (m, 8H). <sup>13</sup>C NMR (101 MHz, Chloroform-*d*) δ 167.96 (d, *J* = 21.3 Hz), 164.16, 161.70, 160.57, 153.18 (dd, *J* = 13.9, 3.2 Hz), 136.78, 131.72, 131.60, 131.56, 131.47, 130.82, 130.74, 128.92, 126.07, 122.50, 122.48, 122.45, 119.17, 118.14 (d, *J* = 21.3 Hz), 114.50 – 112.27 (m), 107.43, 100.77, 95.88, 93.89, 55.06, 41.33 (d, *J* = 26.1 Hz). <sup>19</sup>F NMR (376 MHz, Chloroform-*d*) δ -110.99 (s, 1F), -162.34 (s, 1F). HPLC conditions: Chiralcel AD-H column (250 × 4.6 mm), hexane /*i*-PrOH = 90 / 10, 1 mL / min, 254 nm, τR (major) = 6.84 min, τR (minor) = 7.63 min. HRMS Calcd. for [C<sub>24</sub>H<sub>20</sub>F<sub>2</sub>N<sub>2</sub>O<sub>3</sub>+H]<sup>+</sup> requires *m/z* = 423.1520, found *m/z* = 423.1523.

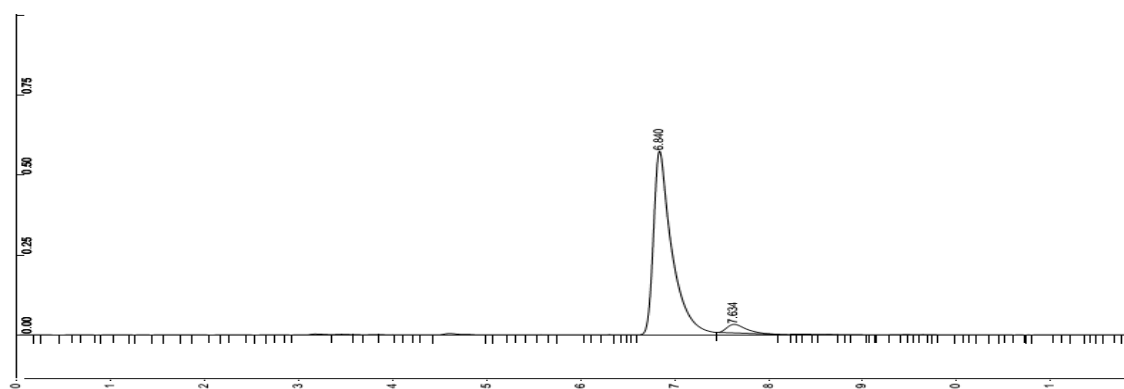

| R.Time       | Area            | Area%          |
|--------------|-----------------|----------------|
| <b>6.840</b> | <b>81551424</b> | <b>96.1530</b> |
| <b>7.634</b> | <b>3262803</b>  | <b>3.8470</b>  |

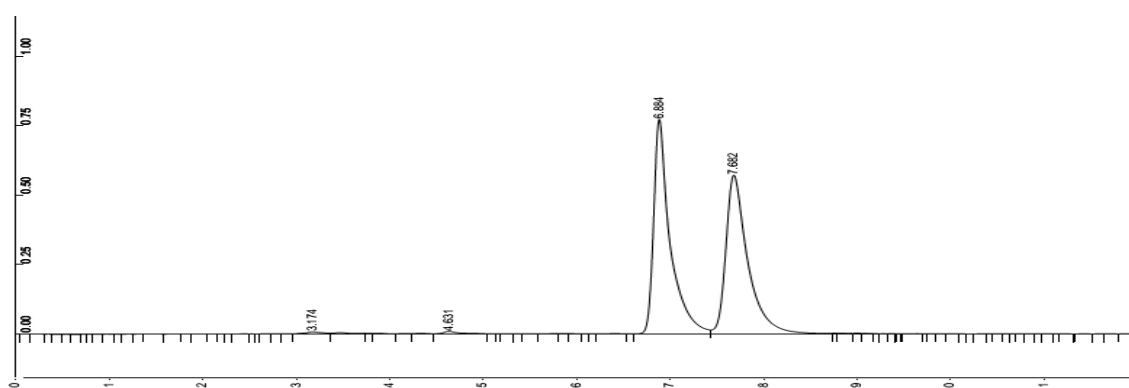

| R.Time       | Area            | Area%          |
|--------------|-----------------|----------------|
| <b>6.884</b> | <b>94762256</b> | <b>50.0017</b> |
| <b>7.682</b> | <b>94755812</b> | <b>49.9983</b> |



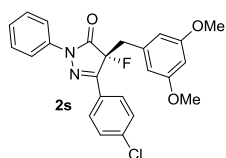

**(R)-3-(4-chlorophenyl)-4-(3,5-bis(methoxy)benzyl)-4-hydroxy-1-phenyl-1H-pyrazol-5(4H)-one (2s)**. White solid, m.p. 122-124°C;  $[\alpha]_{\text{D}}^{25} +64.3$  ( $c$  0.40,  $\text{CHCl}_3$ ); 97% yield, 86% ee.  $^1\text{H}$  NMR (400 MHz, Chloroform- $d$ )  $\delta$  7.89 – 7.78 (m, 2H), 7.77 – 7.62 (m, 2H), 7.54 – 7.43 (m, 2H), 7.43 – 7.33 (m, 2H), 7.25 – 7.15 (m, 1H), 6.23 (t,  $J = 2.3$  Hz, 1H), 6.00 (d,  $J = 2.3$  Hz, 2H), 3.65 – 3.33 (m, 8H).  $^{13}\text{C}$  NMR (101 MHz, Chloroform- $d$ )  $\delta$  167.96 (d,  $J = 21.4$  Hz), 160.60, 153.32 (d,  $J = 14.0$  Hz), 137.26, 136.85, 131.80, 131.69, 129.40, 128.94, 128.04, 128.02, 127.92, 127.90, 126.06, 119.19, 107.52, 100.68, 95.99, 94.01, 55.11, 41.39 (d,  $J = 26.2$  Hz).  $^{19}\text{F}$  NMR (376 MHz, Chloroform- $d$ )  $\delta$  -162.48 (s, 1F). HPLC conditions: Chiralcel AD-H column (250  $\times$  4.6 mm), hexane / *i*-PrOH = 98 / 2, 1 mL / min, 254 nm,  $\tau\text{R}$  (major) = 21.46 min,  $\tau\text{R}$  (minor) = 17.56 min. HRMS Calcd. for  $[\text{C}_{24}\text{H}_{20}\text{FCIN}_2\text{O}_3+\text{H}]^+$  requires  $m/z = 439.1225$ , found  $m/z = 439.1221$ .

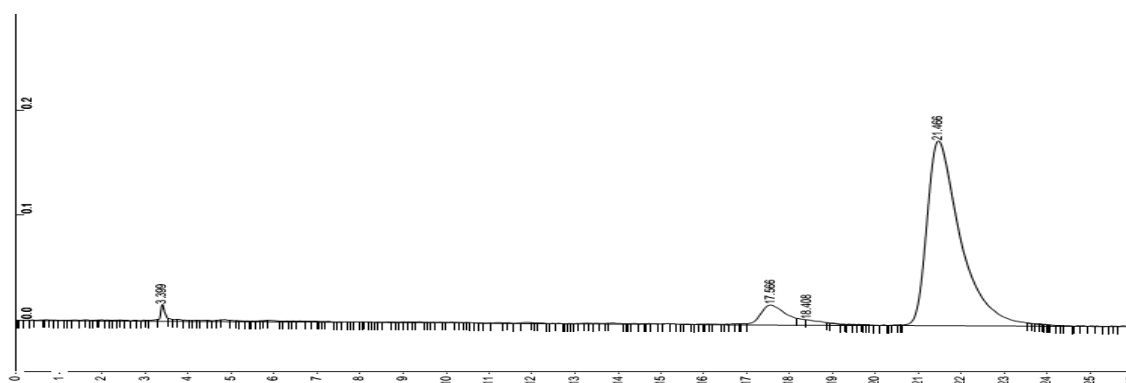

| R.Time | Area    | Area%   |
|--------|---------|---------|
| 17.566 | 5635154 | 7.2022  |
| 21.466 | 2189058 | 92.7978 |

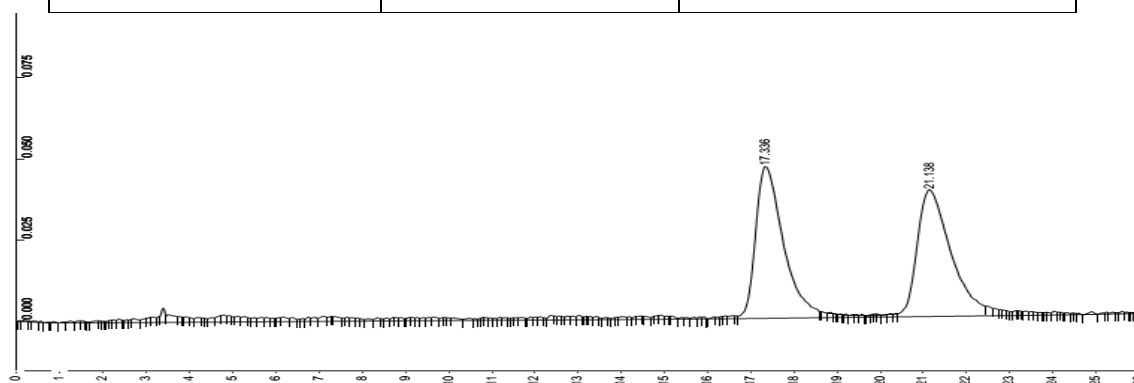

| R.Time | Area     | Area%   |
|--------|----------|---------|
| 17.336 | 21645702 | 50.8739 |
| 21.138 | 20902034 | 49.1261 |

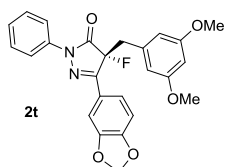

**(R)-3-(3,4-(methylenedioxy)phenyl)-4-(3,5-bis(methoxy)benzyl)-4-fluoro-1-phenyl-1H-pyrazol-5(4H)-one (2t).** Light yellow solid, m.p. 131-133 °C;  $[\alpha]_D^{25} +27.5$  (*c* 0.57, CHCl<sub>3</sub>); 98% yield, 86% ee. <sup>1</sup>H NMR (400 MHz, Chloroform-*d*) δ 7.80 – 7.60 (m, 2H), 7.43 (ddd, *J* = 8.2, 1.8, 1.0 Hz, 1H), 7.41 – 7.31 (m, 3H), 7.24 – 7.13 (m, 1H), 6.92 (d, *J* = 8.1 Hz, 1H), 6.23 (t, *J* = 2.3 Hz, 1H), 6.11 – 5.94 (m, 4H), 3.63 – 3.35 (m, 8H). <sup>13</sup>C NMR (101 MHz, Chloroform-*d*) δ 167.90 (d, *J* = 21.6 Hz), 160.49, 153.86, 153.72, 150.13, 148.43, 136.96, 132.02, 131.90, 128.83, 125.78, 123.71, 123.69, 122.05, 122.02, 119.10, 108.65, 107.53, 106.24, 101.71, 100.61, 96.25, 94.27, 55.09, 41.61 (d, *J* = 26.3 Hz). <sup>19</sup>F NMR (376 MHz, Chloroform-*d*) δ -161.64 (s, 1F). HPLC conditions: Chiralcel AS-H column (250 × 4.6 mm), hexane /*i*-PrOH = 80 / 20, 1 mL / min, 254 nm, τR (major) = 8.45 min, τR (minor) = 10.87 min. HRMS Calcd. for [C<sub>25</sub>H<sub>21</sub>FN<sub>2</sub>O<sub>5</sub>+Na]<sup>+</sup> requires *m/z* = 471.1332, found *m/z* = 471.1327.

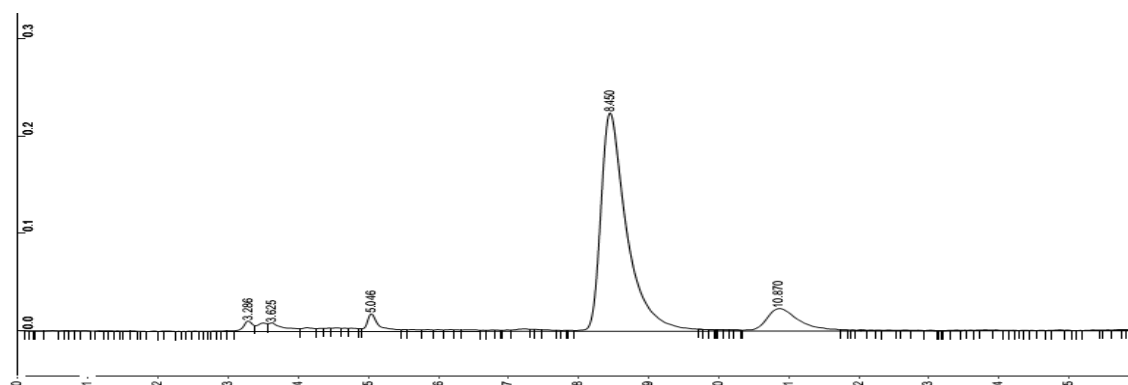

| R.Time        | Area            | Area%          |
|---------------|-----------------|----------------|
| <b>8.450</b>  | <b>58073924</b> | <b>93.0720</b> |
| <b>10.870</b> | <b>4355294</b>  | <b>6.9280</b>  |

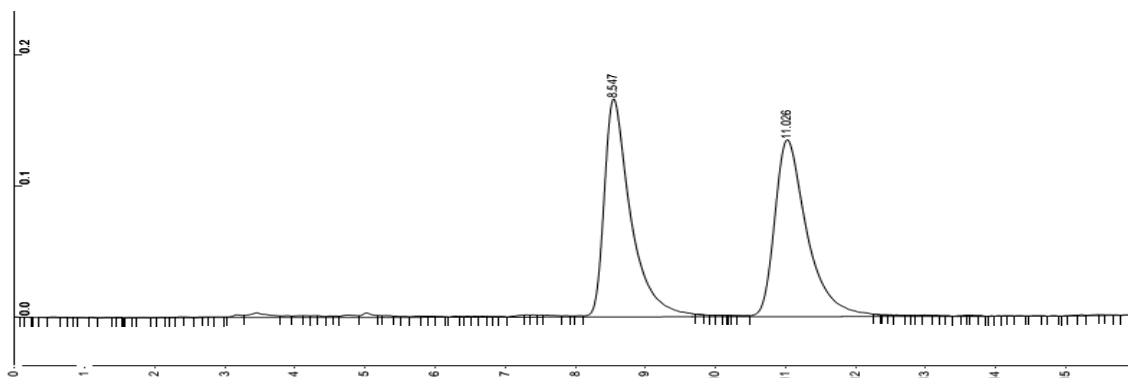

| R.Time        | Area            | Area%          |
|---------------|-----------------|----------------|
| <b>8.547</b>  | <b>44062572</b> | <b>50.3372</b> |
| <b>11.026</b> | <b>43472228</b> | <b>49.6628</b> |

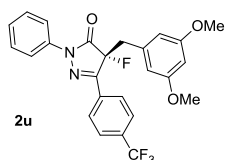

**(R)-3-(4-trifluoromethylphenyl)-4-(3,5-bis(methoxy)benzyl)-4-hydroxy-1-phenyl-1H-pyrazol-5(4H)-one (2u).** Light yellow solid, m.p. 78-81 °C;  $[\alpha]_D^{25} +43.2$  (*c* 0.40, CHCl<sub>3</sub>); 93% yield, 92% ee. <sup>1</sup>H NMR (400 MHz, Chloroform-*d*)  $\delta$  7.98 (d, *J* = 8.1 Hz, 2H), 7.73 (dd, *J* = 8.4, 6.9 Hz, 4H), 7.46 – 7.35 (m, 2H), 7.23 (d, *J* = 7.5 Hz, 1H), 6.23 (t, *J* = 2.3 Hz, 1H), 5.98 (d, *J* = 2.3 Hz, 2H), 3.57 – 3.32 (m, 8H). <sup>13</sup>C NMR (101 MHz, Chloroform-*d*)  $\delta$  167.98 (d, *J* = 21.1 Hz), 160.62, 152.98 (d, *J* = 14.1 Hz), 136.73, 132.47 (q, *J* = 32.8 Hz), 128.98, 126.92, 126.91, 126.22, 125.97, 125.93, 123.67 (q, *J* = 1651.3, 817.3 Hz), 119.22, 107.53, 100.64, 95.78, 93.79, 55.04, 41.29 (d, *J* = 26.0 Hz). <sup>19</sup>F NMR (376 MHz, Chloroform-*d*)  $\delta$  -62.99 (s, 3F), -162.75 (s, 1F). HPLC conditions: Chiralcel AD-H column (250 × 4.6 mm), hexane /*i*-PrOH = 90 / 10, 1 mL / min, 254 nm,  $\tau_R$  (major) = 7.44 min,  $\tau_R$  (minor) = 6.46 min. HRMS Calcd. for [C<sub>25</sub>H<sub>20</sub>F<sub>4</sub>N<sub>2</sub>O<sub>3</sub>+Na]<sup>+</sup> requires *m/z* = 495.1308, found *m/z* = 495.1305.

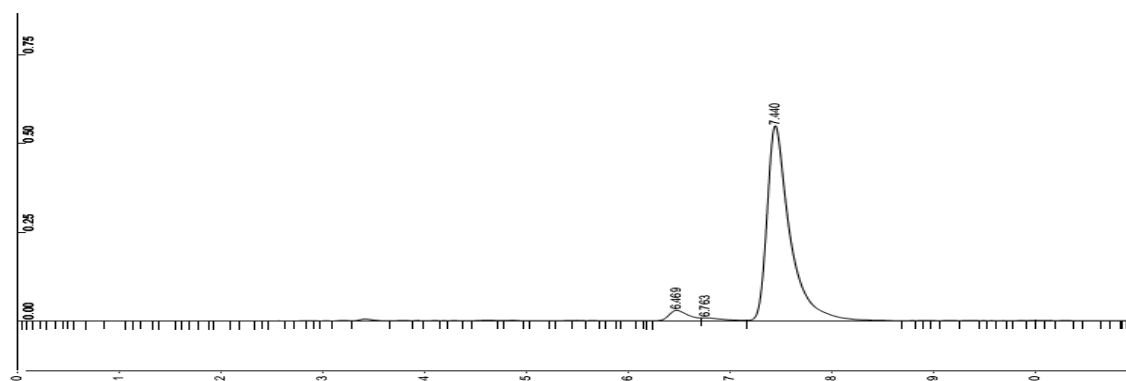

| R.Time | Area     | Area%   |
|--------|----------|---------|
| 6.469  | 4065412  | 4.2335  |
| 7.440  | 91964161 | 95.7665 |

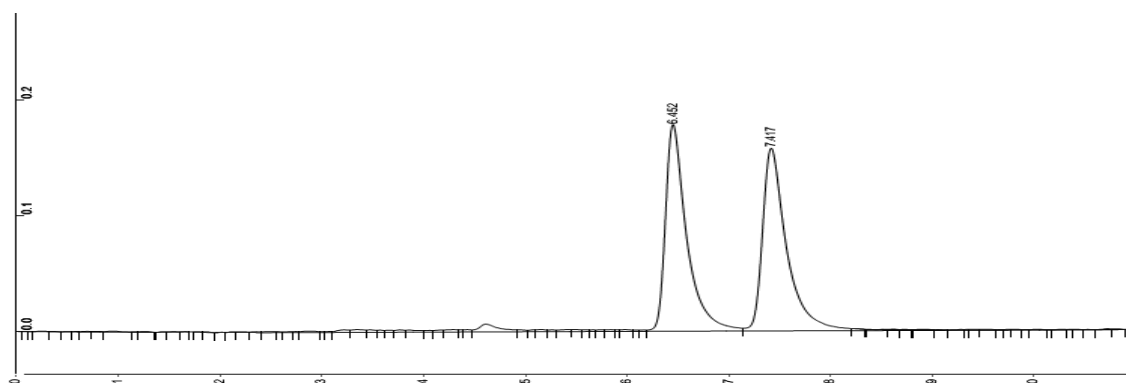

| R.Time | Area     | Area%   |
|--------|----------|---------|
| 6.452  | 25825888 | 49.5009 |
| 7.417  | 26346656 | 50.4991 |

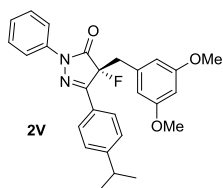

**(R)-3-(4-isopropylphenyl)4-(3,5-bis(methoxy)benzyl)-4-fluoro-1-phenyl-1H-pyrazol-5(4H)-one (2v).** White wax;  $[\alpha]_D^{25} +52.5$  ( $c$  0.42,  $\text{CHCl}_3$ ); 97% yield, 90% ee.  $^1\text{H}$  NMR (400 MHz, Chloroform- $d$ )  $\delta$  7.82 (d,  $J$  = 8.0 Hz, 2H), 7.78 – 7.66 (m, 2H), 7.45 – 7.30 (m, 4H), 7.24 – 7.09 (m, 1H), 6.22 (t,  $J$  = 2.3 Hz, 1H), 6.01 (d,  $J$  = 2.2 Hz, 2H), 3.46 (s, 8H), 3.07 – 2.84 (m, 1H), 1.30 (dd,  $J$  = 6.9, 1.1 Hz, 6H).  $^{13}\text{C}$  NMR (101 MHz, Chloroform- $d$ )  $\delta$  168.05 (d,  $J$  = 21.4 Hz), 160.44, 154.31 (d,  $J$  = 13.8 Hz), 152.41, 137.02, 132.07, 131.95, 128.84, 127.18, 127.12, 126.79, 126.78, 125.78, 119.16, 107.39, 100.93, 96.21, 94.23, 55.00, 41.43 (d,  $J$  = 26.2 Hz), 34.21, 23.75, 23.74.  $^{19}\text{F}$  NMR (376 MHz, Chloroform- $d$ )  $\delta$  -161.86 (s, 1F). HPLC conditions: Chiralcel AD-H column (250  $\times$  4.6 mm), hexane / $i$ -PrOH = 80 / 20, 1 mL / min, 254 nm,  $\tau_R$  (major) = 5.80 min,  $\tau_R$  (minor) = 4.77 min. HRMS Calcd. for  $[\text{C}_{27}\text{H}_{27}\text{FN}_2\text{O}_3 + \text{Na}]^+$  requires  $m/z$  = 469.1903, found  $m/z$  = 469.1905.

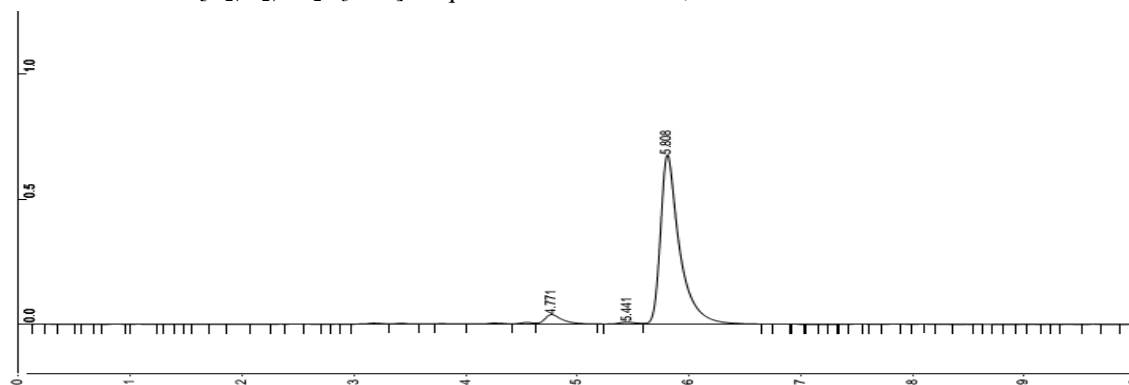

| R.Time       | Area            | Area%          |
|--------------|-----------------|----------------|
| <b>4.771</b> | <b>4638473</b>  | <b>4.9705</b>  |
| <b>5.808</b> | <b>88681575</b> | <b>95.0295</b> |

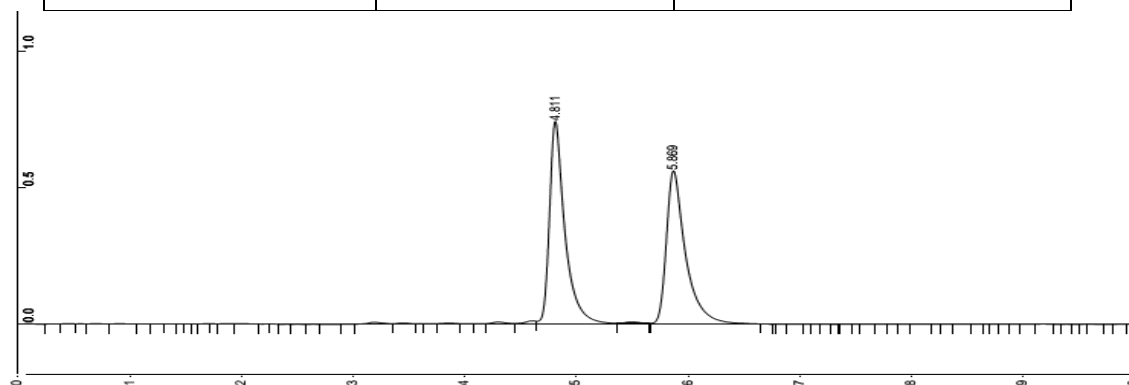

| R.Time       | Area            | Area%          |
|--------------|-----------------|----------------|
| <b>4.811</b> | <b>72197344</b> | <b>51.6427</b> |
| <b>5.869</b> | <b>67604280</b> | <b>48.3573</b> |

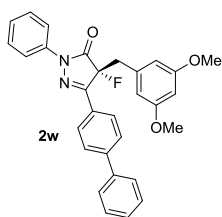

**(R)-3-(4-(phenyl)phenyl)4-(3,5-bis(methoxy)benzyl)-4-fluoro-1-phenyl-1H-pyrazol-5(4H)-one (2w).** White solid, m.p. 140-142 °C;  $[\alpha]_D^{25} +37.2$  ( $c$  0.38,  $\text{CHCl}_3$ ); 98% yield, 90% ee.  $^1\text{H}$  NMR (400 MHz, Chloroform- $d$ )  $\delta$  8.04 – 7.89 (m, 2H), 7.79 – 7.69 (m, 4H), 7.69 – 7.61 (m, 2H), 7.54 – 7.46 (m, 2H), 7.44 – 7.34 (m, 3H), 7.25 – 7.19 (m, 1H), 6.23 (t,  $J = 2.3$  Hz, 1H), 6.05 (d,  $J = 2.3$  Hz, 2H), 3.69 – 3.49 (m, 2H), 3.47 (s, 6H).  $^{13}\text{C}$  NMR (101 MHz, Chloroform- $d$ )  $\delta$  168.12 (d,  $J = 21.3$  Hz), 160.55, 154.03 (d,  $J = 14.0$  Hz), 143.75, 139.90, 137.01, 131.97 (d,  $J = 11.8$  Hz), 129.05, 128.92, 128.44, 128.43, 128.18, 127.64, 127.18, 127.16, 127.12, 125.94, 119.23, 107.53, 100.85, 96.22, 94.24, 55.09, 41.52 (d,  $J = 26.2$  Hz).  $^{19}\text{F}$  NMR (376 MHz, Chloroform- $d$ )  $\delta$  -162.05 (s, 1F). HPLC conditions: Chiralcel AD-H column (250  $\times$  4.6 mm), hexane / $i$ -PrOH = 80 / 20, 1 mL / min, 254 nm,  $\tau\text{R}$  (major) = 11.16 min,  $\tau\text{R}$  (minor) = 8.91 min. HRMS Calcd. for  $[\text{C}_{30}\text{H}_{25}\text{FN}_2\text{O}_3 + \text{Na}]^+$  requires  $m/z = 503.1747$ , found  $m/z = 503.1743$ .

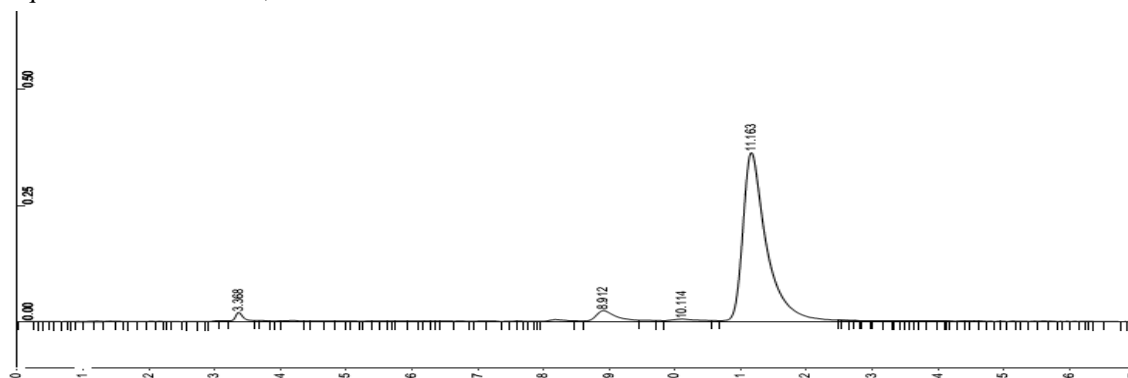

| R.Time | Area     | Area%   |
|--------|----------|---------|
| 8.912  | 1782540  | 5.0578  |
| 11.163 | 33460846 | 94.9422 |

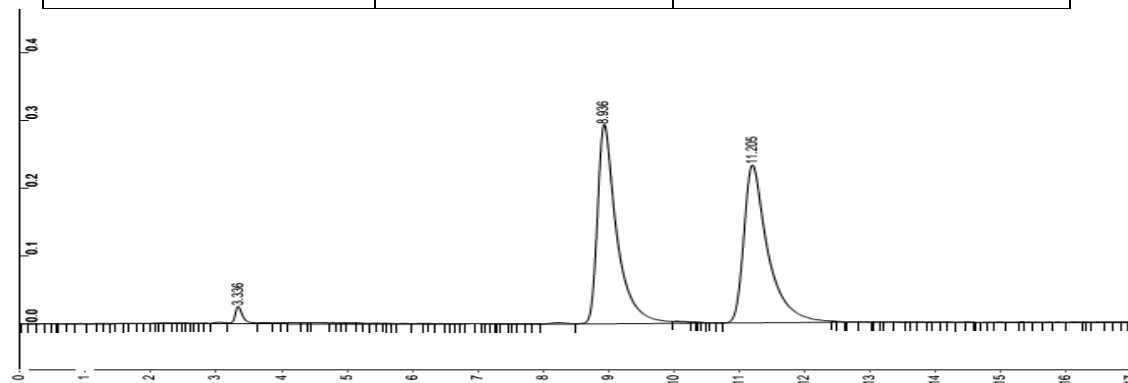

| R.Time | Area     | Area%   |
|--------|----------|---------|
| 8.936  | 60801088 | 50.8094 |
| 11.205 | 58863950 | 49.1906 |

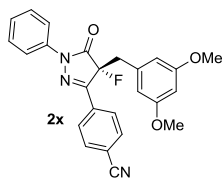

**(R)-3-(4-(cyano)phenyl)-4-(3,5-bis(methoxy)benzyl)-4-fluoro-1-phenyl-1H-pyrazol-5(4H)-one (2x).** White solid, m.p. 145-147 °C;  $[\alpha]_{\text{D}}^{25} +38.1$  ( $c$  0.31,  $\text{CHCl}_3$ ); 93% yield, 89% ee.  $^1\text{H}$  NMR (400 MHz, Chloroform- $d$ )  $\delta$  7.95 (d,  $J = 8.3$  Hz, 2H), 7.82 – 7.64 (m, 4H), 7.46 – 7.35 (m, 2H), 7.31 – 7.18 (m, 1H), 6.23 (t,  $J = 2.3$  Hz, 1H), 5.97 (d,  $J = 2.3$  Hz, 2H), 3.66 – 3.37 (m, 8H).  $^{13}\text{C}$  NMR (101 MHz, Chloroform- $d$ )  $\delta$  167.96 (d,  $J = 21.2$  Hz), 160.69, 152.52 (d,  $J = 14.1$  Hz), 136.63, 133.51, 133.49, 132.71, 131.58, 131.47, 129.04, 127.01, 127.00, 126.39, 119.23, 118.15, 114.22, 107.59, 100.52, 95.64, 93.65, 41.32 (d,  $J = 26.0$  Hz), 55.12.  $^{19}\text{F}$  NMR (376 MHz, Chloroform- $d$ )  $\delta$  -163.05 (s, 1F). HPLC conditions: Chiralcel AD-H column (250  $\times$  4.6 mm), hexane / $i$ -PrOH = 80 / 20, 1 mL / min, 254 nm,  $\tau\text{R}$  (major) = 10.41 min,  $\tau\text{R}$  (minor) = 13.74 min. HRMS Calcd. for  $[\text{C}_{25}\text{H}_{20}\text{FN}_3\text{O}_3 + \text{Na}]^+$  requires  $m/z = 452.1386$ , found  $m/z = 452.1389$ .

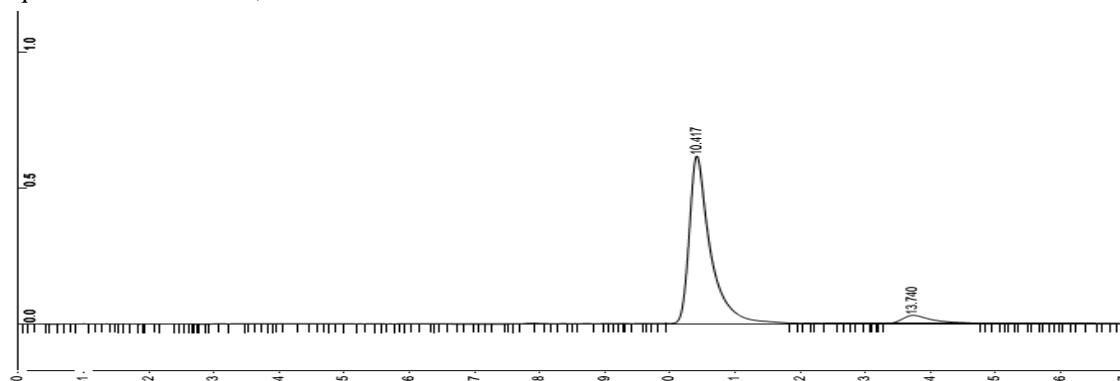

| R.Time        | Area             | Area%          |
|---------------|------------------|----------------|
| <b>10.417</b> | <b>142426464</b> | <b>94.4466</b> |
| <b>13.740</b> | <b>8374585</b>   | <b>5.5534</b>  |

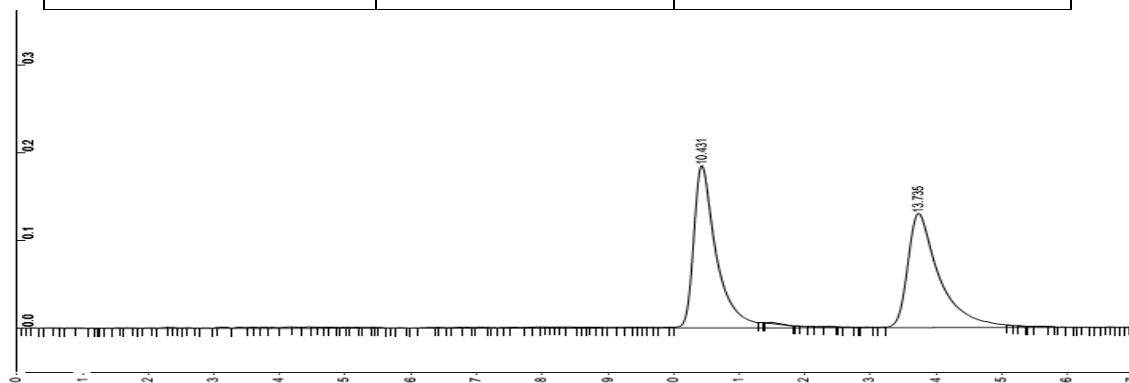

| R.Time        | Area            | Area%          |
|---------------|-----------------|----------------|
| <b>10.431</b> | <b>45867988</b> | <b>51.0201</b> |
| <b>13.735</b> | <b>44033880</b> | <b>48.9799</b> |

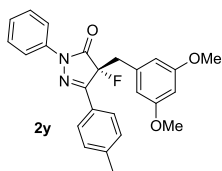

**(R)-3-(4-(methyl)phenyl)4-(3,5-bis(methoxy)benzyl)-4-fluoro-1-phenyl-1H-pyrazol-5(4H)-one (2y).** White solid, m.p. 132-135 °C;  $[\alpha]_D^{25} +42.3$  (*c* 0.40, CHCl<sub>3</sub>); 98% yield, 92% ee. <sup>1</sup>H NMR (400 MHz, Chloroform-*d*) δ 7.73 (d, *J* = 8.0 Hz, 2H), 7.68 – 7.57 (m, 2H), 7.35 – 7.26 (m, 2H), 7.23 (d, *J* = 8.0 Hz, 2H), 7.16 – 7.07 (m, 1H), 6.14 (t, *J* = 2.3 Hz, 1H), 5.94 (d, *J* = 2.3 Hz, 2H), 3.55 – 3.32 (m, 8H), 2.36 (s, 3H). <sup>13</sup>C NMR (101 MHz, CDCl<sub>3</sub>) δ 168.07 (d, *J* = 21.5 Hz), 160.49, 154.33 (d, *J* = 13.9 Hz), 141.63, 137.03, 132.06, 131.93, 129.79, 128.86, 126.81, 126.66, 126.64, 125.82, 119.20, 107.49, 100.79, 96.30, 94.32, 55.08, 41.46 (d, *J* = 26.2 Hz), 21.68. <sup>19</sup>F NMR (376 MHz, Chloroform-*d*) δ -161.91 (s, 1F). HPLC conditions: Chiralcel AD-H column (250 × 4.6 mm), hexane / *i*-PrOH = 98 / 2, 1 mL / min, 254 nm, τR (major) = 18.71 min, τR (minor) = 14.22 min. HRMS Calcd. for [C<sub>25</sub>H<sub>23</sub>FN<sub>2</sub>O<sub>3</sub>+Na]<sup>+</sup> requires *m/z* = 441.1590, found *m/z* = 441.1587.

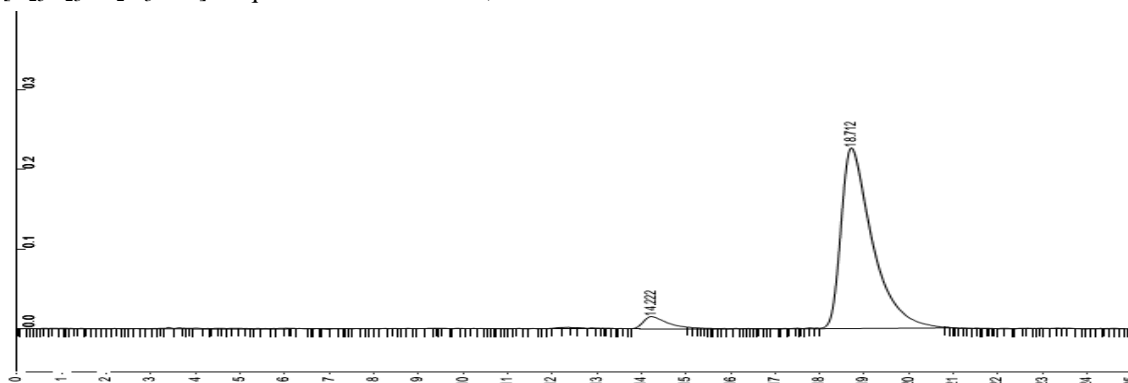

| R.Time | Area      | Area%   |
|--------|-----------|---------|
| 14.222 | 5708837   | 4.0023  |
| 18.712 | 136930071 | 95.9977 |

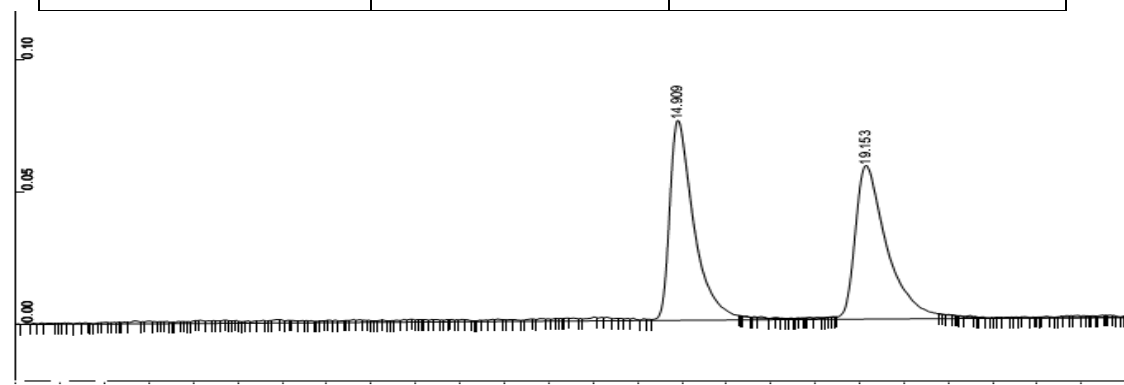

| R.Time | Area     | Area%   |
|--------|----------|---------|
| 14.909 | 29295790 | 50.1869 |
| 19.153 | 29077542 | 49.8131 |

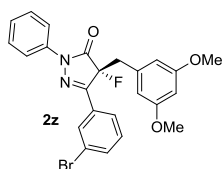

**(R)-3-(3-(bromo)phenyl)4-(3,5-bis(methoxy)benzyl)-4-fluoro-1-phenyl-1H-pyrazol-5(4H)-one (2z).** White solid, m.p. 114-117 °C;  $[\alpha]_D^{25} +51.2$  (*c* 0.41, CHCl<sub>3</sub>); 99% yield, 95% ee. <sup>1</sup>H NMR (400 MHz, Chloroform-*d*) δ 7.90 (d, *J* = 1.9 Hz, 1H), 7.72 (d, *J* = 7.8 Hz, 1H), 7.68 – 7.60 (m, 2H), 7.59 – 7.50 (m, 1H), 7.30 (dt, *J* = 10.3, 7.7 Hz, 3H), 7.16 (q, *J* = 7.4, 6.2 Hz, 1H), 6.16 (t, *J* = 2.3 Hz, 1H), 5.93 (d, *J* = 2.3 Hz, 2H), 3.55 – 3.31 (m, 8H). <sup>13</sup>C NMR (101 MHz, Chloroform-*d*) δ 166.91 (d, *J* = 21.3 Hz), 159.55, 151.92 (d, *J* = 13.8 Hz), 135.74, 132.91, 131.02 – 130.16 (m), 129.50, 127.90, 125.06, 124.16 (d, *J* = 2.0 Hz), 122.18, 118.15, 106.44, 99.85, 94.80, 92.82, 54.04, 40.28 (d, *J* = 26.0 Hz). <sup>19</sup>F NMR (376 MHz, Chloroform-*d*) δ -162.59 (s, 1F). HPLC conditions: Chiralcel AD-H column (250 × 4.6 mm), hexane /*i*-PrOH = 90 / 10, 1 mL / min, 254 nm, τR (major) = 6.60 min, τR (minor) = 7.38 min. HRMS Calcd. for [C<sub>24</sub>H<sub>20</sub>BrFN<sub>2</sub>O<sub>3</sub>+Na]<sup>+</sup> requires *m/z* = 505.0539, found *m/z* = 505.0545.

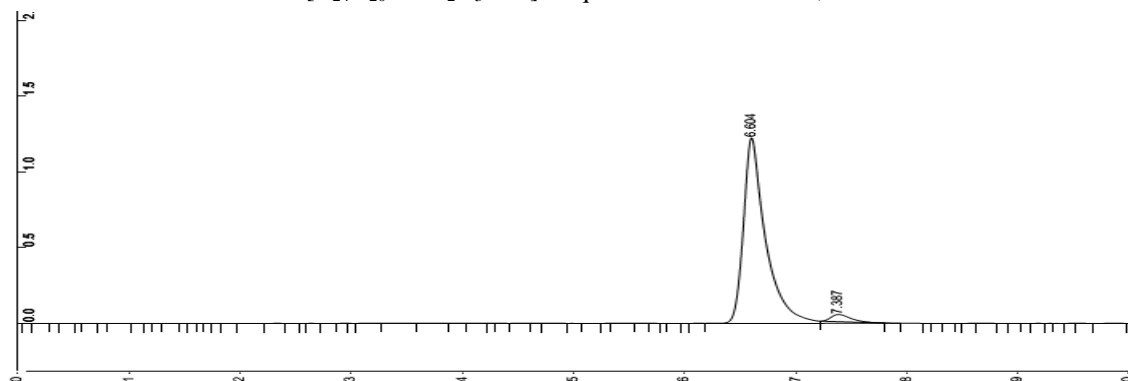

| R.Time       | Area             | Area%          |
|--------------|------------------|----------------|
| <b>6.604</b> | <b>171962848</b> | <b>97.5073</b> |
| <b>7.387</b> | <b>4396099</b>   | <b>2.4927</b>  |

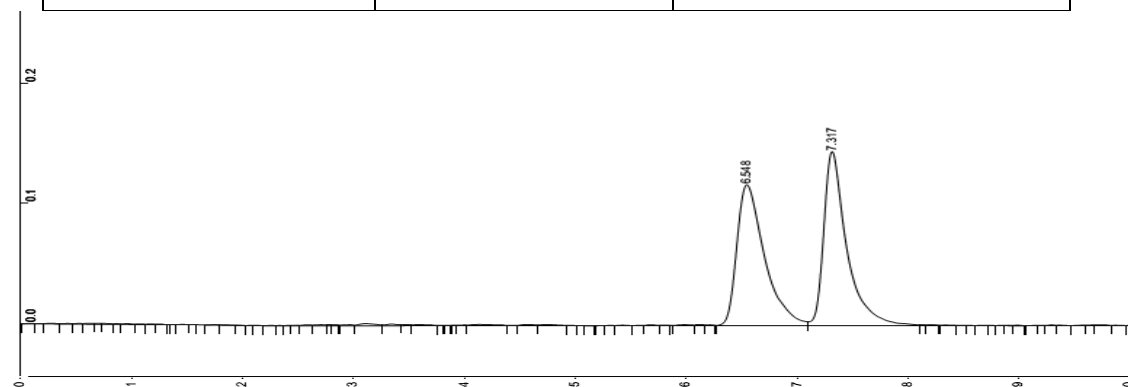

| R.Time       | Area            | Area%          |
|--------------|-----------------|----------------|
| <b>6.548</b> | <b>20402396</b> | <b>49.1906</b> |
| <b>7.317</b> | <b>21073850</b> | <b>50.8094</b> |



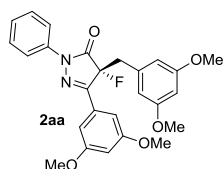

**(R)-3-(3,5-bis(methoxy)phenyl)4-(3,5-bis(methoxy)benzyl)-4-fluoro-1-phenyl-1H-pyrazol-5(4H)-one (2aa).** White solid, m.p. 148-151 °C;  $[\alpha]_D^{25} +21.2$  (c 0.40, CHCl<sub>3</sub>); 98% yield, 96% ee. <sup>1</sup>H NMR (400 MHz, Chloroform-*d*) δ 7.79 – 7.62 (m, 2H), 7.50 (dt, *J* = 8.6, 1.5 Hz, 1H), 7.43 – 7.32 (m, 3H), 7.25 – 7.15 (m, 1H), 6.97 (d, *J* = 8.4 Hz, 1H), 6.23 (t, *J* = 2.3 Hz, 1H), 6.04 (d, *J* = 2.3 Hz, 2H), 3.98 (s, 3H), 3.94 (s, 3H), 3.62 – 3.39 (m, 8H). <sup>13</sup>C NMR (101 MHz, CDCl<sub>3</sub>) δ 168.00 (d, *J* = 21.4 Hz), 160.51, 154.12 (d, *J* = 13.8 Hz), 151.71, 149.52, 136.99, 132.06 (d, *J* = 12.1 Hz), 128.85, 125.86, 122.47, 120.80, 120.77, 119.32, 110.86, 108.54, 107.59, 100.67, 96.35, 94.37, 56.06, 55.09, 41.78. <sup>9</sup>F NMR (376 MHz, Chloroform-*d*) δ -161.65 (s, 1F). (d, *J* = 26.2 Hz). HPLC conditions: Chiralcel AD-H column (250 × 4.6 mm), hexane /*i*-PrOH = 80 / 20, 1 mL / min, 254 nm, τR (major) = 9.20 min, τR (minor) = 10.84 min. HRMS Calcd. for [C<sub>26</sub>H<sub>25</sub>FN<sub>2</sub>O<sub>5</sub>+Na]<sup>+</sup> requires m/z = 487.1645, found m/z = 487.1641.

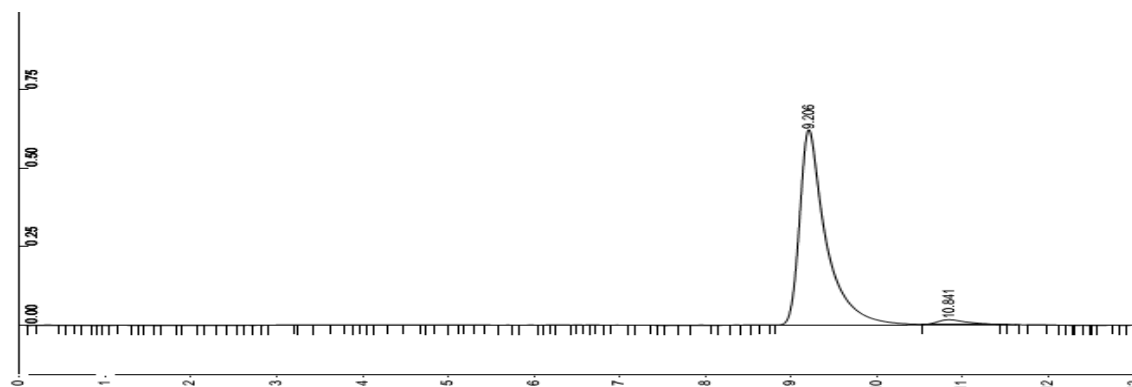

| R.Time        | Area             | Area%          |
|---------------|------------------|----------------|
| <b>9.206</b>  | <b>133625192</b> | <b>98.0071</b> |
| <b>10.841</b> | <b>2717167</b>   | <b>1.9929</b>  |

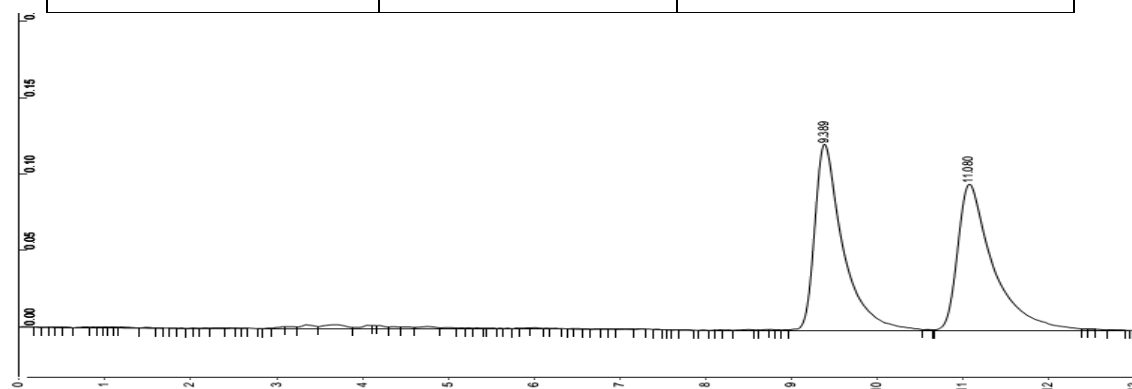

| R.Time        | Area            | Area%          |
|---------------|-----------------|----------------|
| <b>9.389</b>  | <b>29927560</b> | <b>50.2301</b> |
| <b>11.080</b> | <b>27671706</b> | <b>49.7699</b> |

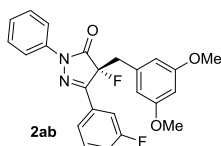

**(R)-3-(3-(fluoro)phenyl)4-(3,5-bis(methoxy)benzyl)-4-fluoro-1-phenyl-1H-pyrazol-5(4H)-one (2ab).** White wax;  $[\alpha]_D^{25} +17.8$  (c 0.40,  $\text{CHCl}_3$ ); 98% yield, 94% ee.  $^1\text{H}$  NMR (400 MHz, Chloroform-*d*)  $\delta$  7.76 – 7.64 (m, 3H), 7.59 (dt,  $J = 9.7, 2.1$  Hz, 1H), 7.48 (td,  $J = 8.1, 5.7$  Hz, 1H), 7.43 – 7.33 (m, 2H), 7.25 – 7.17 (m, 2H), 6.23 (t,  $J = 2.3$  Hz, 1H), 6.01 (d,  $J = 2.3$  Hz, 2H), 3.63 – 3.39 (m, 8H).  $^{13}\text{C}$  NMR (101 MHz, Chloroform-*d*)  $\delta$  167.99 (d,  $J = 21.2$  Hz), 164.19, 161.73, 160.60, 153.20 (d,  $J = 10.9$  Hz), 136.81, 132.33 – 131.31 (m), 130.81 (d,  $J = 8.1$  Hz), 128.95, 126.10, 122.53, 122.51, 122.49, 119.20, 118.17 (d,  $J = 21.3$  Hz), 113.40 (d,  $J = 23.3$  Hz), 107.46, 100.80, 95.90, 93.92, 55.08, 41.36 (d,  $J = 26.2$  Hz).  $^{19}\text{F}$  NMR (376 MHz, Chloroform-*d*)  $\delta$  -111.00 (s, 1F), -162.32 (s, 1F). HPLC conditions: Chiralcel AD-H column (250  $\times$  4.6 mm), hexane /*i*-PrOH = 90 / 10, 1 mL / min, 254 nm,  $\tau\text{R}$  (major) = 6.62 min,  $\tau\text{R}$  (minor) = 7.34 min. HRMS Calcd. for  $[\text{C}_{24}\text{H}_{20}\text{F}_2\text{N}_2\text{O}_3 + \text{Na}]^+$  requires  $m/z = 445.1340$ , found  $m/z = 445.1336$ .

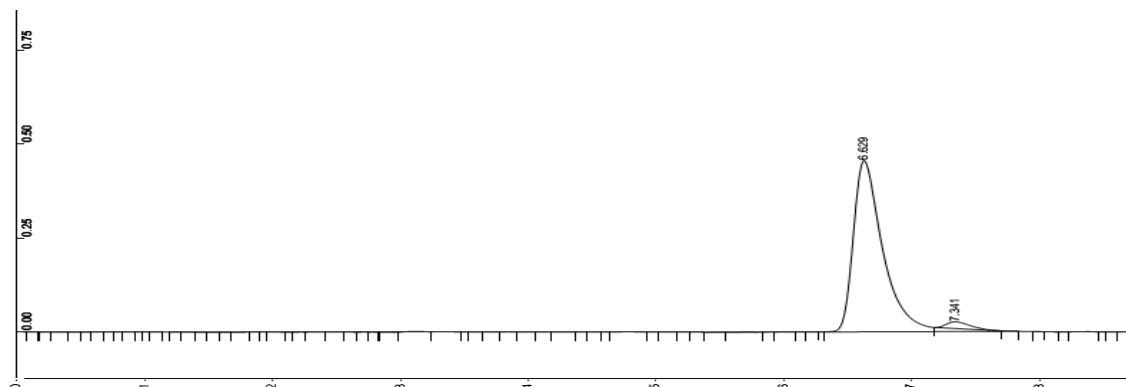

| R.Time       | Area            | Area%          |
|--------------|-----------------|----------------|
| <b>6.629</b> | <b>74521648</b> | <b>97.0382</b> |
| <b>7.341</b> | <b>2274514</b>  | <b>2.9618</b>  |

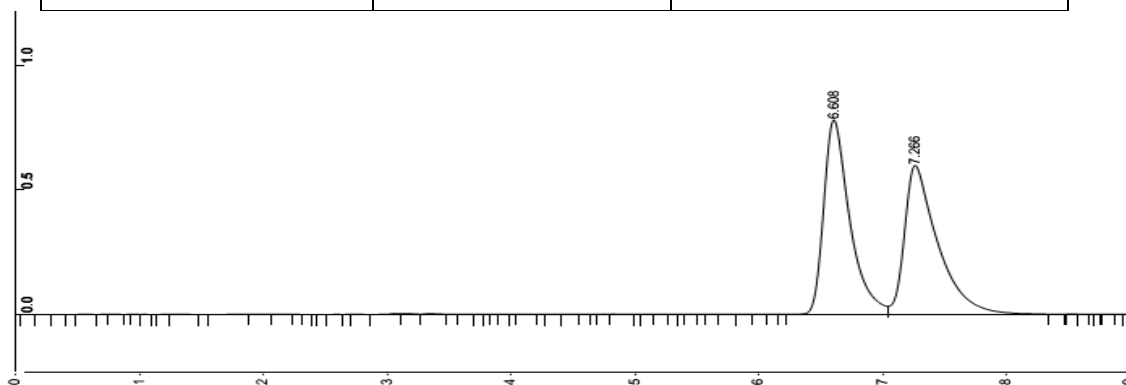

| R.Time       | Area             | Area%          |
|--------------|------------------|----------------|
| <b>6.608</b> | <b>114577792</b> | <b>50.3311</b> |
| <b>7.266</b> | <b>113070384</b> | <b>49.6689</b> |

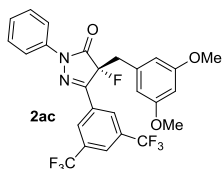

**(R)-3-(3,5-bis(trifluoromethyl)phenyl)-4-(3,5-bis(methoxy)benzyl)-4-fluoro-1-phenyl-1H-pyrazol-5(4H)-one (2ac).** White solid, m.p. 63-65 °C;  $[\alpha]_D^{25} +39.5$  (*c* 0.40, CHCl<sub>3</sub>); 98% yield, 80% ee. <sup>1</sup>H NMR (400 MHz, Chloroform-*d*) δ 8.20 – 8.06 (m, 2H), 7.95 (s, 1H), 7.83 – 7.68 (m, 2H), 7.51 – 7.31 (m, 2H), 7.34 – 7.26 (m, 1H), 6.23 (t, *J* = 2.3 Hz, 1H), 5.99 (d, *J* = 2.3 Hz, 2H), 3.61 – 3.40 (m, 8H). <sup>13</sup>C NMR (101 MHz, Chloroform-*d*) δ 167.89 (d, *J* = 21.2 Hz), 160.78, 152.06 (d, *J* = 14.4 Hz), 136.58, 132.48 (q, *J* = 33.9 Hz), 131.91 – 131.45 (m), 129.12, 126.54, 126.35, 124.17, 123.99, 107.78, 100.45, 95.45, 93.46, 55.04, 41.45 (d, *J* = 25.6 Hz). <sup>19</sup>F NMR (376 MHz, Chloroform-*d*) δ -62.99 (s, 6F), -164.91 (s, 1F). HPLC conditions: Chiralcel AS-H column (250 × 4.6 mm), hexane /*i*-PrOH = 95 / 5, 1 mL / min, 254 nm, τ<sub>R</sub> (major) = 4.38 min, τ<sub>R</sub> (minor) = 3.82 min. HRMS Calcd. for [C<sub>26</sub>H<sub>19</sub>F<sub>7</sub>N<sub>2</sub>O<sub>3</sub>+Na]<sup>+</sup> requires *m/z* = 563.1182, found *m/z* = 563.1186.

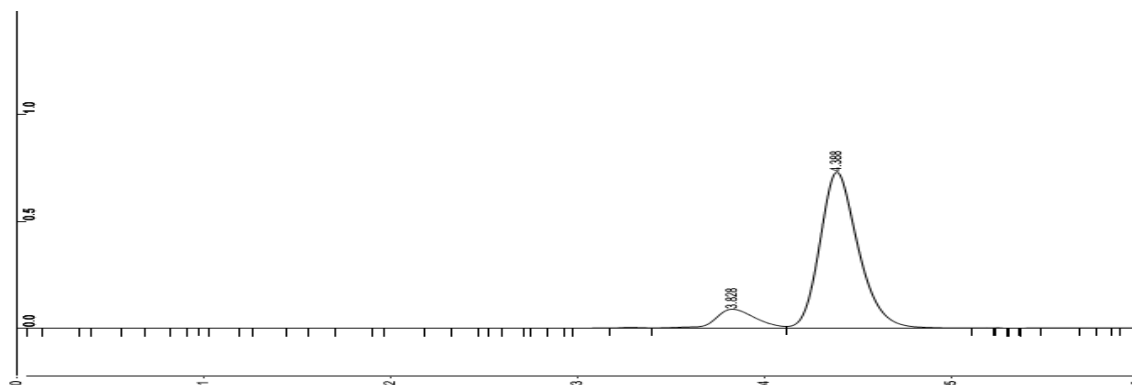

| R.Time | Area      | Area%   |
|--------|-----------|---------|
| 3.828  | 13386573  | 10.0049 |
| 4.388  | 107033578 | 79.9951 |

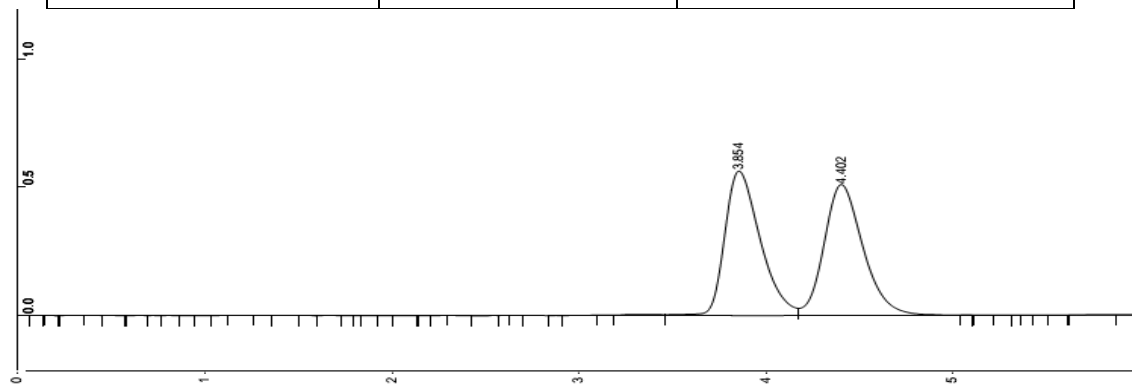

| R.Time | Area     | Area%   |
|--------|----------|---------|
| 3.854  | 73959952 | 50.0547 |
| 4.402  | 73798304 | 49.9453 |

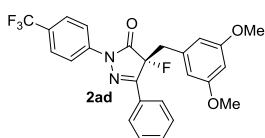

**(R)-1-(4-trifluoromethylphenyl)-4-(3,5-bis(methoxy)benzyl)-4-fluoro-3-phenyl-1H-pyrazol-5(4H)-one (2ad).** Brown oil,  $[\alpha]_D^{25} +19.3$  ( $c$  0.40,  $\text{CHCl}_3$ ); 98% yield, 92% ee.  $^1\text{H}$  NMR (400 MHz, Chloroform- $d$ )  $\delta$  8.00 – 7.87 (m, 4H), 7.67 – 7.60 (m, 2H), 7.57 – 7.49 (m, 3H), 6.21 (t,  $J$  = 2.3 Hz, 1H), 5.98 (d,  $J$  = 2.3 Hz, 2H), 3.61 – 3.35 (m, 8H).  $^{13}\text{C}$  NMR (101 MHz, Chloroform- $d$ )

$\delta$  168.33 (d,  $J$  = 21.6 Hz), 160.56, 154.82 (d,  $J$  = 13.9 Hz), 139.69, 131.52, 131.49, 129.17, 128.23 – 126.91 (m), 126.80, 126.78, 126.15, 126.12, 118.45, 107.42, 100.75, 96.18, 94.19, 55.05, 41.37 (d,  $J$  = 26.1 Hz).  $^{19}\text{F}$  NMR (376 MHz, Chloroform- $d$ )  $\delta$  -62.25 (s, 3F), -161.37 (s, 1F). HPLC conditions: Chiralcel AD-H column (250  $\times$  4.6 mm), hexane /  $i$ -PrOH = 80 / 20, 1 mL / min, 254 nm,  $\tau_R$  (major) = 6.06min,  $\tau_R$  (minor) = 6.40 min. HRMS Calcd. for  $[\text{C}_{25}\text{H}_{20}\text{F}_4\text{N}_2\text{O}_3 + \text{Na}]^+$  requires  $m/z$  = 495.1308, found  $m/z$  = 495.1311.

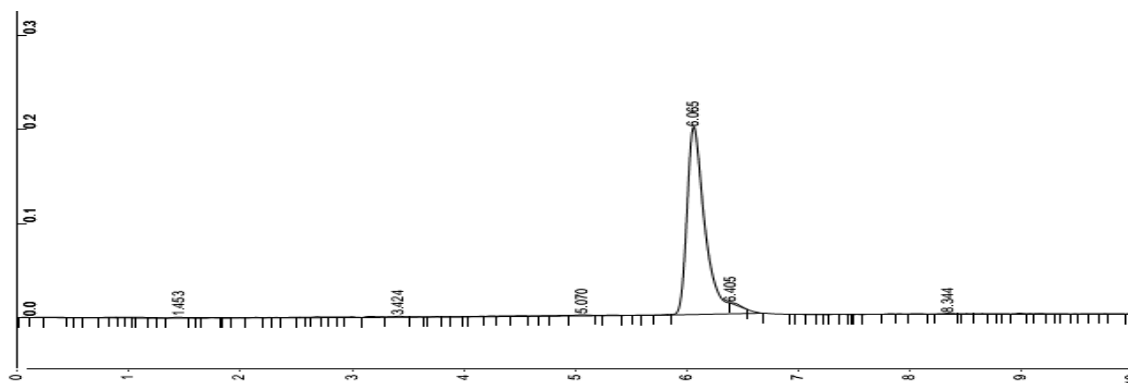

| R.Time       | Area            | Area%          |
|--------------|-----------------|----------------|
| <b>6.065</b> | <b>22825084</b> | <b>96.1051</b> |
| <b>6.405</b> | <b>925043</b>   | <b>3.8949</b>  |

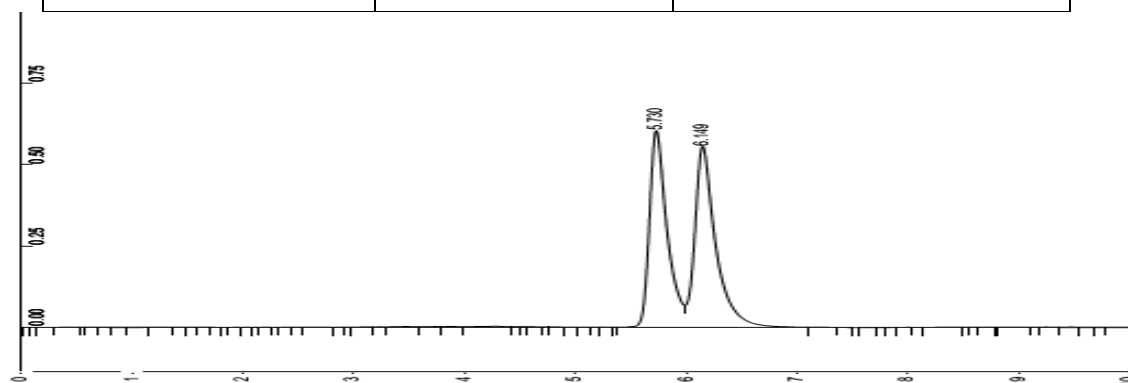

| R.Time       | Area            | Area%          |
|--------------|-----------------|----------------|
| <b>5.730</b> | <b>66959468</b> | <b>47.7232</b> |
| <b>6.149</b> | <b>73348640</b> | <b>52.2768</b> |

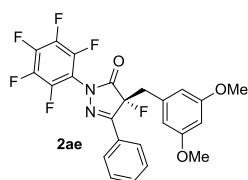

**(R)-1-(2,3,4,5,6-fluorophenyl)-4-(3,5-bis(methoxy)benzyl)-4-fluoro-3-phenyl-1H-pyrazol-5(4H)-one (2ae).** White wax,  $[\alpha]_D^{25} +57.1$  ( $c$  0.40,  $\text{CHCl}_3$ ); 92% yield, 83% ee.  $^1\text{H}$  NMR (400 MHz, Chloroform- $d$ )  $\delta$  7.90 – 7.72 (m, 2H), 7.57 – 7.33 (m, 3H), 6.25 (t,  $J = 2.3$  Hz, 1H), 5.96 (d,  $J = 2.2$  Hz, 2H), 3.56 – 3.41 (m, 8H).  $^{13}\text{C}$  NMR (101 MHz, Chloroform- $d$ )  $\delta$  167.53 (d,  $J = 21.6$  Hz), 159.72, 154.90 (d,  $J = 14.1$  Hz), 144.05 (dd,  $J = 12.0, 4.1$  Hz), 142.66 – 140.89 (m), 141.46 – 138.89 (m), 138.50 – 137.16 (m), 136.44 – 134.59 (m), 130.55, 128.21, 128.08, 128.07, 125.71, 125.70, 106.75, 99.60, 93.51, 91.53, 54.06, 39.96 (d,  $J = 26.0$  Hz).  $^{19}\text{F}$  NMR (376 MHz, Chloroform- $d$ )  $\delta$  -142.54 – 143.00 (m, 2F), -151.62 – 152.05 (m, 1F), -160.88 (s, 1F), -160.92 – 161.16 (m, 2F). HPLC conditions: Chiralcel AD-H column (250  $\times$  4.6 mm), hexane /  $i$ -PrOH = 90 / 10, 1 mL / min, 254 nm,  $\tau_R$  (major) = 5.46 min,  $\tau_R$  (minor) = 6.08 min. HRMS Calcd. for  $[\text{C}_{24}\text{H}_{16}\text{F}_6\text{N}_2\text{O}_3 + \text{Na}]^+$  requires  $m/z = 517.0963$ , found  $m/z = 517.0967$ .

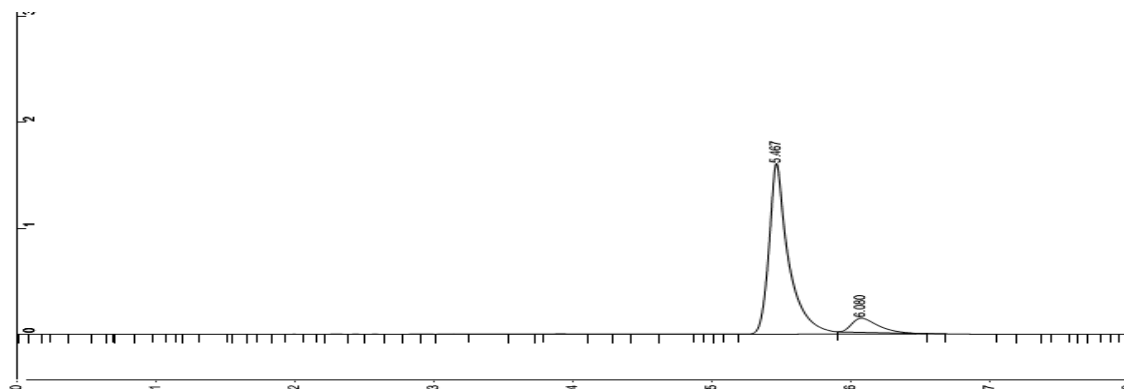

| R.Time       | Area             | Area%          |
|--------------|------------------|----------------|
| <b>5.467</b> | <b>161875480</b> | <b>91.5702</b> |
| <b>6.080</b> | <b>14901987</b>  | <b>8.4298</b>  |

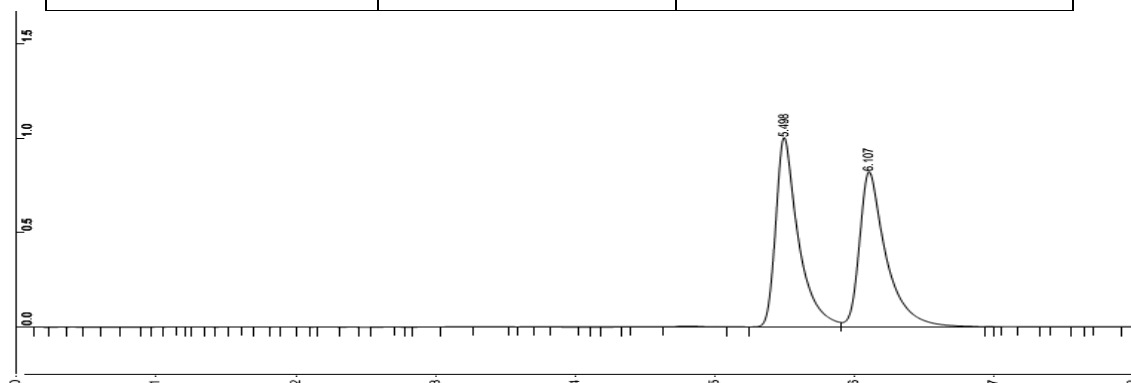

| R.Time       | Area             | Area%          |
|--------------|------------------|----------------|
| <b>5.498</b> | <b>113450080</b> | <b>50.9616</b> |
| <b>6.107</b> | <b>109168544</b> | <b>49.0384</b> |

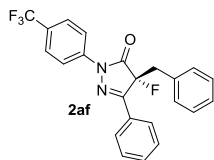

**(R)-1-(4-(trifluoromethyl)phenyl)-4-benzyl-4-fluoro-3-phenyl-1H-pyrazol-5(4H)-one (2af).** Brown oil,  $[\alpha]_D^{25} +43.2$  (c 0.40,  $\text{CHCl}_3$ ); 97% yield, 92% ee.  $^1\text{H}$  NMR (400 MHz, Chloroform-*d*)  $\delta$  7.88 – 7.71 (m, 4H), 7.58 – 7.37 (m, 5H), 7.10 – 6.94 (m, 3H), 6.86 – 6.71 (m, 2H), 3.64 – 3.39 (m, 2H).  $^{13}\text{C}$  NMR (101 MHz, Chloroform-*d*)  $\delta$  167.21 (d,  $J = 21.7$  Hz), 153.70 (d,  $J = 14.0$  Hz), 138.56, 130.47, 128.81, 128.62, 128.50, 128.17, 128.04 (d,  $J = 1.8$  Hz), 127.43, 127.04, 125.75 (d,  $J = 1.8$  Hz), 125.07 (q,  $J = 3.8$  Hz), 117.49, 95.38, 93.38, 40.16 (d,  $J = 26.0$  Hz).  $^{19}\text{F}$  NMR (376 MHz, Chloroform-*d*)  $\delta$  -62.27 (s, 3F), -162.06 (s, 1F). HPLC conditions: Chiralcel AD-H column (250  $\times$  4.6 mm), hexane /*i*-PrOH = 99 / 1, 1 mL / min, 254 nm,  $\tau\text{R}$  (major) = 9.62 min,  $\tau\text{R}$  (minor) = 7.28 min. HRMS Calcd. for  $[\text{C}_{23}\text{H}_{16}\text{F}_4\text{N}_2\text{O} + \text{Na}]^+$  requires  $m/z = 435.1096$ , found  $m/z = 435.1091$ .

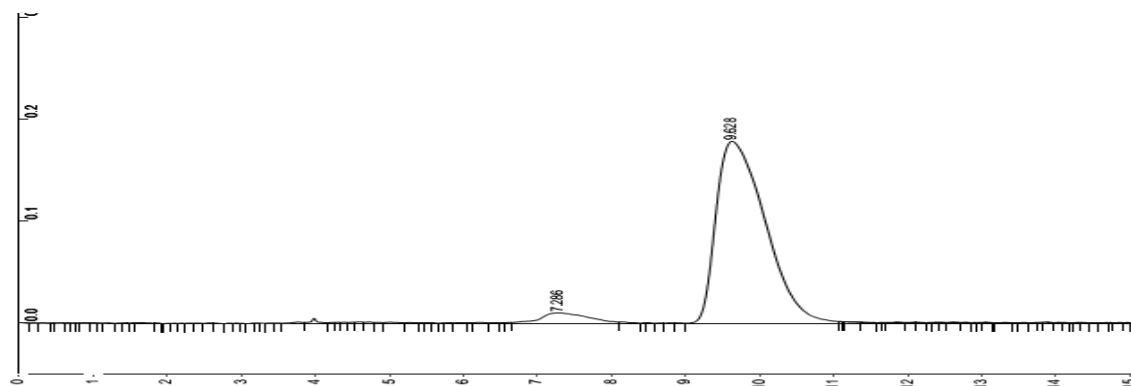

| R.Time       | Area             | Area%          |
|--------------|------------------|----------------|
| <b>7.286</b> | <b>4611572</b>   | <b>4.1560</b>  |
| <b>9.628</b> | <b>106350218</b> | <b>95.8440</b> |

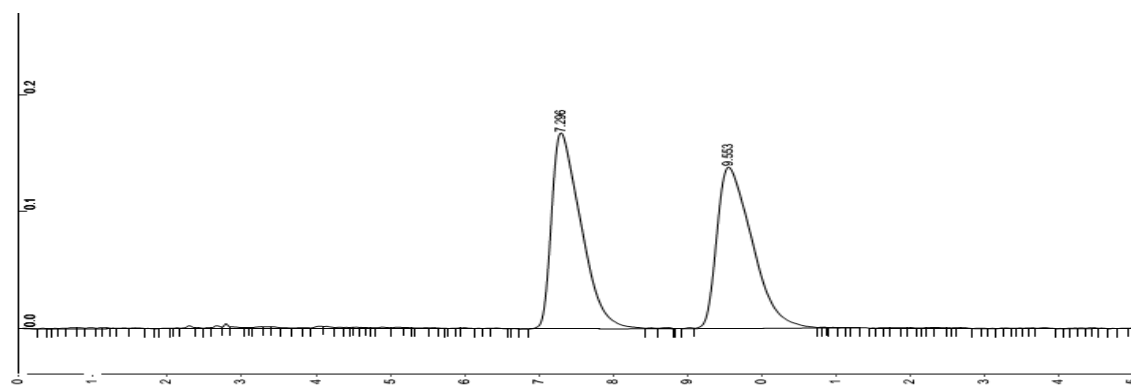

| R.Time       | Area            | Area%          |
|--------------|-----------------|----------------|
| <b>7.296</b> | <b>46053968</b> | <b>50.3926</b> |
| <b>9.553</b> | <b>45336320</b> | <b>49.6074</b> |

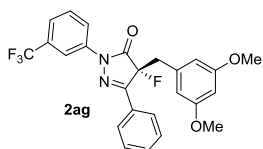

**(R)-1-(3-trifluoromethylphenyl)-4-(3,5-bis(methoxy)benzyl)-4-fluoro-3-p henyl-1H-pyrazol-5(4H)-one (2ag).** White solid, m.p. 73-75 °C;  $[\alpha]_D^{25}$  +58.1 (*c* 0.40, CHCl<sub>3</sub>); 97% yield, 90% ee. <sup>1</sup>H NMR (400 MHz, Chloroform-*d*) δ 8.01 – 7.76 (m, 4H), 7.54 – 7.33 (m, 5H), 6.13 (t, *J* = 2.3 Hz, 1H), 5.92 (d, *J* = 2.3 Hz, 2H), 3.55 – 3.42 (m, 2H), 3.40 (s, 6H). <sup>13</sup>C NMR (101 MHz, CDCl<sub>3</sub>) δ 168.23 (d, *J* = 21.6 Hz), 160.59, 154.76 (d, *J* =

14.1 Hz), 137.40, 131.69, 131.56, 131.48, 131.21, 129.54, 129.24, 129.18, 126.82, 126.80, 123.02 – 121.87 (m), 121.84, 115.94 – 115.33 (m), 107.44, 100.78, 96.26, 94.27, 55.05, 41.43 (d, *J* = 26.2 Hz). <sup>19</sup>F NMR (376 MHz, Chloroform-*d*) δ -62.71 (s, 3F), -161.76 (s, 1F). HPLC conditions: Chiralcel AD-H column (250 × 4.6 mm), hexane /*i*-PrOH = 93 / 7, 1 mL / min, 254 nm, τR (major) = 5.27 min, τR (minor) = 5.89 min. HRMS Calcd. for [C<sub>25</sub>H<sub>20</sub>F<sub>4</sub>N<sub>2</sub>O<sub>3</sub>+Na]<sup>+</sup> requires *m/z* = 495.1308, found *m/z* = 495.1303.

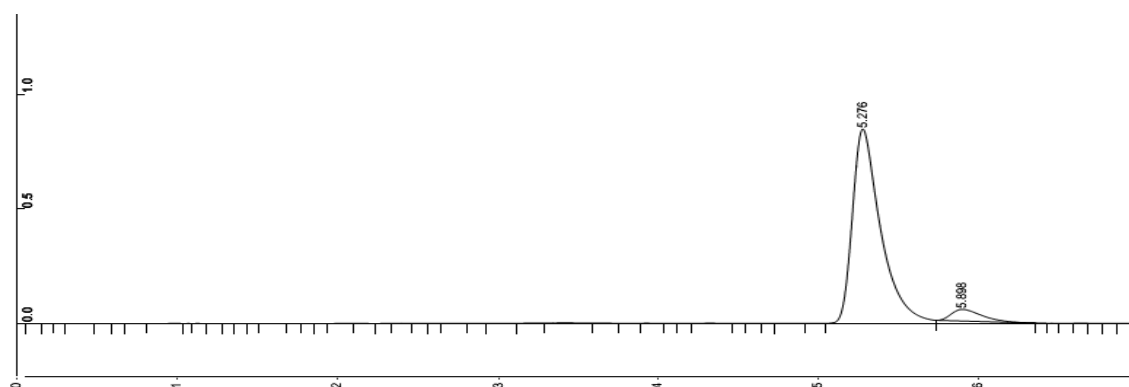

| R.Time | Area      | Area%   |
|--------|-----------|---------|
| 5.276  | 107602176 | 95.1845 |
| 5.898  | 5443725   | 4.8155  |

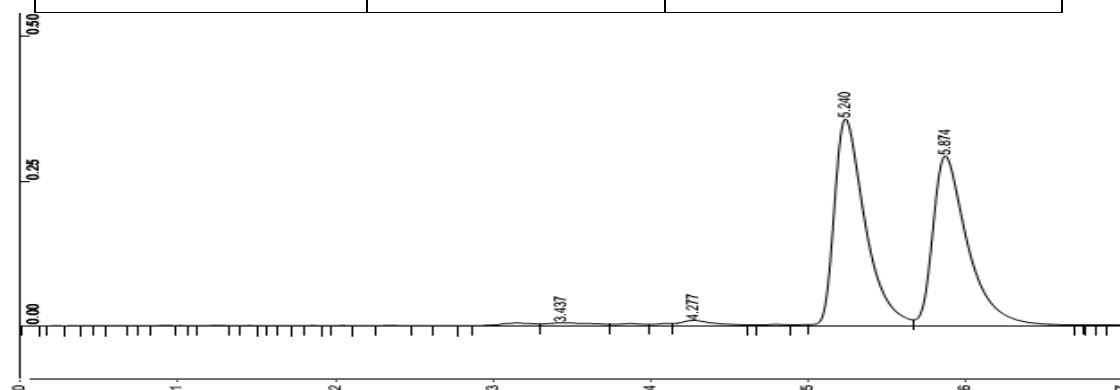

| R.Time | Area     | Area%   |
|--------|----------|---------|
| 5.240  | 48472348 | 50.1599 |
| 5.874  | 48163307 | 49.8401 |

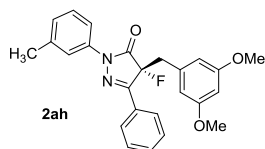

**(R)-1-(3-methylphenyl)-4-(3,5-bis(methoxy)benzyl)-4-fluoro-3-phenyl-1H-pyrazol-5(4H)-one (2ah).** Brown oil;  $[\alpha]_D^{25} +31.2$  (c 0.40,  $\text{CHCl}_3$ ); 97% yield, 92% ee.  $^1\text{H}$  NMR (400 MHz, Chloroform-*d*)  $\delta$  7.97 – 7.82 (m, 2H), 7.57 – 7.44 (m, 5H), 7.32 – 7.20 (m, 1H), 7.03 (ddt,  $J = 7.5, 1.7, 0.9$  Hz, 1H), 6.22 (t,  $J = 2.3$  Hz, 1H), 6.01 (d,  $J = 2.3$  Hz, 2H), 3.65 – 3.34 (m, 8H), 2.37 (s, 3H).  $^{13}\text{C}$  NMR (101 MHz, Chloroform-*d*)  $\delta$  168.08 (d,  $J = 21.3$  Hz), 160.53, 154.14 (d,  $J = 13.8$  Hz), 138.87, 136.88, 132.00, 131.88, 131.08, 129.67, 129.65, 129.06, 128.72, 126.79, 126.70, 126.68, 119.94, 116.57, 107.45, 100.89, 96.15, 94.17, 55.06, 41.39 (d,  $J = 26.3$  Hz), 21.55.  $^{19}\text{F}$  NMR (376 MHz, Chloroform-*d*)  $\delta$  -161.88 (s, 1F). HPLC conditions: Chiralcel OJ-H column (250  $\times$  4.6 mm), hexane /*i*-PrOH = 98 / 2, 1 mL / min, 254 nm,  $\tau_R$  (major) = 16.66 min,  $\tau_R$  (minor) = 19.44 min. HRMS Calcd. for  $[\text{C}_{25}\text{H}_{23}\text{FN}_2\text{O}_3 + \text{Na}]^+$  requires  $m/z = 441.1590$ , found  $m/z = 441.1584$ .

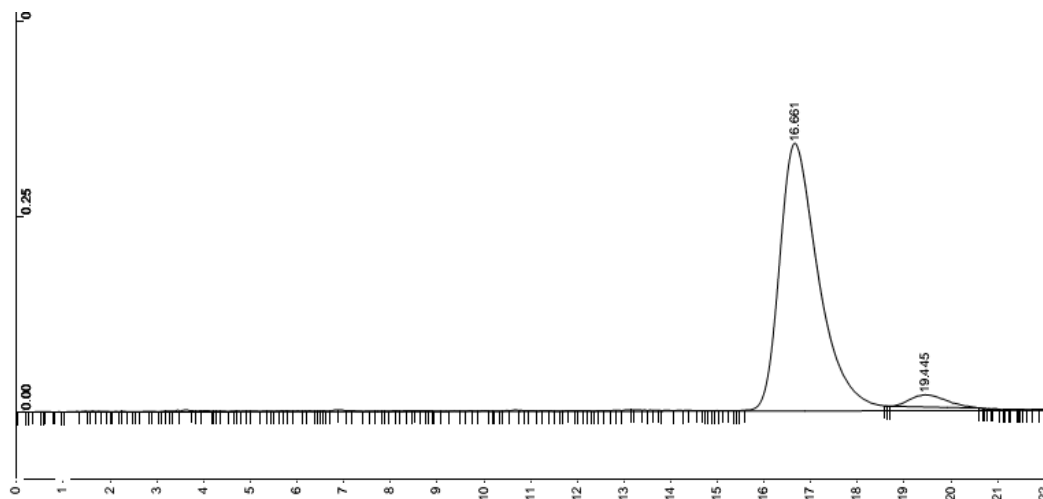

| R.Time | Area      | Area%   |
|--------|-----------|---------|
| 16.661 | 205245264 | 96.1042 |
| 19.445 | 8320151   | 3.8958  |

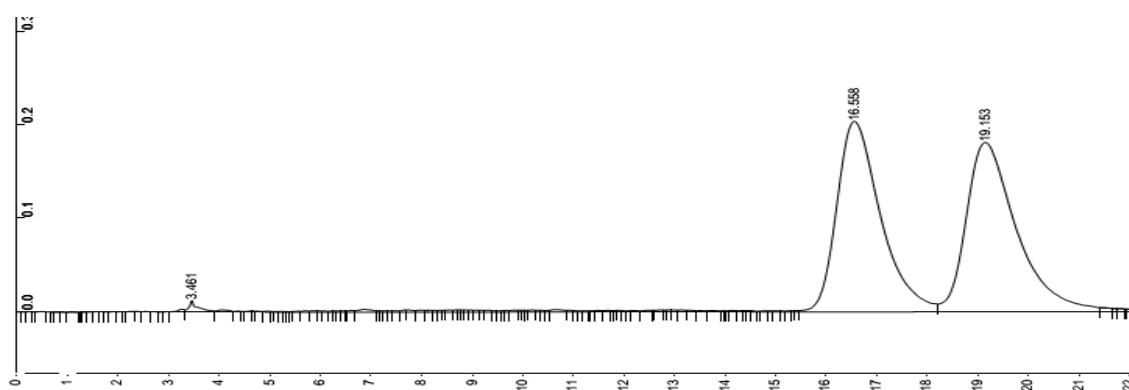

| R.Time | Area      | Area%   |
|--------|-----------|---------|
| 16.558 | 122398784 | 49.9655 |
| 19.153 | 122567811 | 50.0345 |



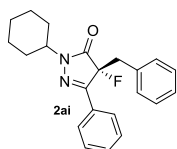

**(R)-1-cyclohexyl-4-benzyl-4-fluoro-3-phenyl-1H-pyrazol-5(4H)-one (2ai).** White solid, m.p. 81-83 °C;  $[\alpha]_D^{25} +49.1$  (*c* 0.40, CHCl<sub>3</sub>); 96% yield, 98% ee. <sup>1</sup>H NMR (400 MHz, Chloroform-*d*)  $\delta$  7.85 (dd, *J* = 6.7, 3.0 Hz, 2H), 7.57 – 7.37 (m, 3H), 7.24 – 7.03 (m, 3H), 6.95 – 6.74 (m, 2H), 3.84 (ddd, *J* = 11.2, 6.9, 4.2 Hz, 1H), 3.61 – 3.31 (m, 2H), 1.86 – 1.72 (m, 1H), 1.72 – 1.52 (m, 4H), 1.31 – 0.98 (m, 6H). <sup>13</sup>C NMR (101 MHz, Chloroform-*d*)  $\delta$  168.54 (d, *J* = 20.8 Hz), 152.91 (d, *J* = 13.7 Hz), 130.54, 130.13, 129.02, 128.25, 127.71, 126.30, 126.29, 96.54, 94.56, 52.84, 40.76 (d, *J* = 26.1 Hz), 30.13, 30.00, 25.22, 25.08. <sup>19</sup>F NMR (376 MHz, Chloroform-*d*)  $\delta$  -165.69 (s, 1F). HPLC conditions: Chiralcel OJ-H column (250 × 4.6 mm), hexane /*i*-PrOH = 99 / 1, 0.5 mL / min, 254 nm,  $\tau$ R (major) = 15.05 min,  $\tau$ R (minor) = 12.07 min. HRMS Calcd. for [C<sub>22</sub>H<sub>23</sub>FN<sub>2</sub>O+Na]<sup>+</sup> requires *m/z* = 373.1692, found *m/z* = 373.1687.

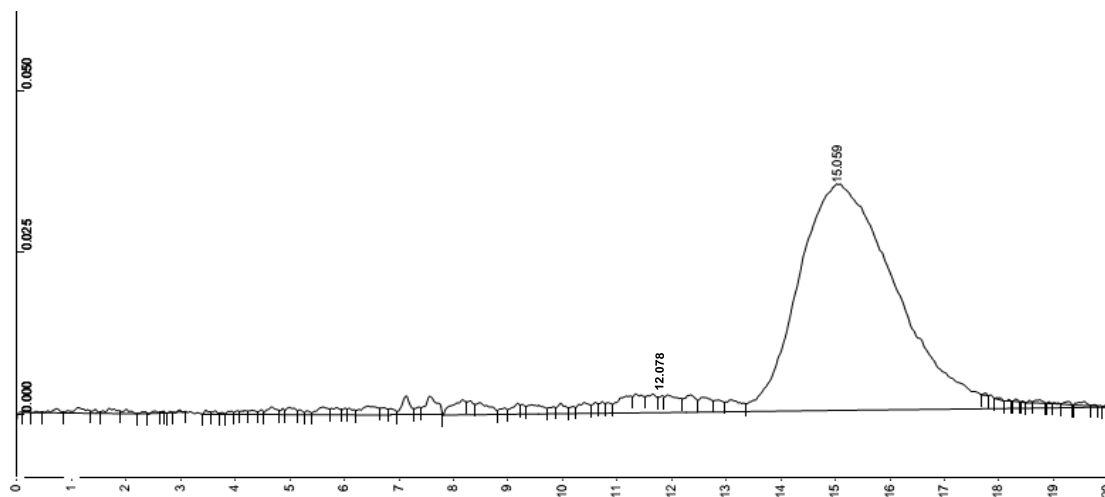

| R.Time | Area     | Area%   |
|--------|----------|---------|
| 12.078 | 374675   | 0.8470  |
| 15.059 | 43860816 | 99.1530 |

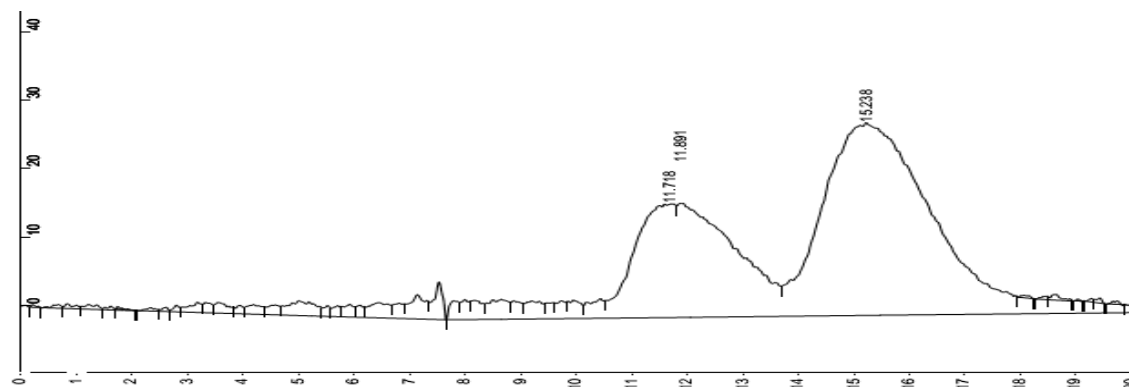

| R.Time | Area     | Area%   |
|--------|----------|---------|
| 11.718 | 8231438  | 34.4801 |
| 15.238 | 15641573 | 65.5199 |

### 3.3 Crystallographic data

CCDC 2159180 contains the supplementary crystallographic data for this paper. These data can be obtained free of charge from The Cambridge Crystallographic Data Centre via [www.ccdc.cam.ac.uk/data\\_request/cif](http://www.ccdc.cam.ac.uk/data_request/cif)

**Crystal Data** for  $C_{25}H_{20}F_4N_2O_3$  ( $M=472.43$  g/mol): orthorhombic, space group  $P2_12_12_1$  (no. 19),  $a=8.5752(4)\text{\AA}$ ,  $b=12.4172(6)\text{\AA}$ ,  $c=20.9749(10)\text{\AA}$ ,  $V=2233.40(17)\text{\AA}^3$ ,  $Z=4$ ,  $T=293(2)$  K,  $\mu(\text{CuK}\alpha)=0.987\text{ mm}^{-1}$ ,  $D_{\text{calc}}=1.405\text{ g/cm}^3$ , 22488 reflections measured ( $8.274^\circ \leq 2\theta \leq 142.708^\circ$ ), 4307 unique ( $R_{\text{int}}=0.0412$ ,  $R_{\text{sigma}}=0.0294$ ) which were used in all calculations. The final  $R_1$  was 0.0425 ( $I > 2\sigma(I)$ ) and  $wR_2$  was 0.1179 (all data).

Table 1 Crystal data and structure refinement for CCDC 2159180.

|                                               |                                                                    |
|-----------------------------------------------|--------------------------------------------------------------------|
| Identification code                           | 202110                                                             |
| Empirical formula                             | $C_{25}H_{20}F_4N_2O_3$                                            |
| Formula weight                                | 472.43                                                             |
| Temperature/K                                 | 293(2)                                                             |
| Crystal system                                | orthorhombic                                                       |
| Space group                                   | $P2_12_12_1$                                                       |
| $a/\text{\AA}$                                | 8.5752(4)                                                          |
| $b/\text{\AA}$                                | 12.4172(6)                                                         |
| $c/\text{\AA}$                                | 20.9749(10)                                                        |
| $\alpha/^\circ$                               | 90                                                                 |
| $\beta/^\circ$                                | 90                                                                 |
| $\gamma/^\circ$                               | 90                                                                 |
| Volume/ $\text{\AA}^3$                        | 2233.40(17)                                                        |
| $Z$                                           | 4                                                                  |
| $\rho_{\text{calc}}/\text{g/cm}^3$            | 1.405                                                              |
| $\mu/\text{mm}^{-1}$                          | 0.987                                                              |
| $F(000)$                                      | 976.0                                                              |
| Crystal size/ $\text{mm}^3$                   | $0.16 \times 0.12 \times 0.1$                                      |
| Radiation                                     | $\text{CuK}\alpha$ ( $\lambda = 1.54184$ )                         |
| $2\theta$ range for data collection/ $^\circ$ | 8.274 to 142.708                                                   |
| Index ranges                                  | $-10 \leq h \leq 10$ , $-15 \leq k \leq 14$ , $-25 \leq l \leq 24$ |
| Reflections collected                         | 22488                                                              |
| Independent reflections                       | 4307 [ $R_{\text{int}}=0.0412$ , $R_{\text{sigma}}=0.0294$ ]       |
| Data/restraints/parameters                    | 4307/0/309                                                         |
| Goodness-of-fit on $F^2$                      | 1.052                                                              |

|                                                |                                  |
|------------------------------------------------|----------------------------------|
| Final R indexes [ $I \geq 2\sigma(I)$ ]        | $R_1 = 0.0425$ , $wR_2 = 0.1094$ |
| Final R indexes [all data]                     | $R_1 = 0.0493$ , $wR_2 = 0.1179$ |
| Largest diff. peak/hole / $e \text{ \AA}^{-3}$ | 0.21/-0.20                       |
| Flack parameter                                | 0.01(9)                          |

Table 2 Bond Lengths for CCDC 2159180.

| Atom | Atom | Length/ $\text{\AA}$ | Atom | Atom | Length/ $\text{\AA}$ |
|------|------|----------------------|------|------|----------------------|
| F1   | C2   | 1.391(3)             | C5   | C6   | 1.370(5)             |
| F2   | C10  | 1.327(5)             | C6   | C7   | 1.381(5)             |
| F3   | C10  | 1.325(4)             | C7   | C8   | 1.379(4)             |
| F4   | C10  | 1.316(4)             | C7   | C10  | 1.489(4)             |
| O1   | C1   | 1.206(4)             | C8   | C9   | 1.381(4)             |
| O2   | C14  | 1.370(5)             | C11  | C12  | 1.514(4)             |
| O2   | C18  | 1.410(7)             | C12  | C13  | 1.392(5)             |
| O3   | C16  | 1.369(4)             | C12  | C17  | 1.382(5)             |
| O3   | C19  | 1.402(5)             | C13  | C14  | 1.389(5)             |
| N1   | N2   | 1.403(3)             | C14  | C15  | 1.378(6)             |
| N1   | C1   | 1.373(4)             | C15  | C16  | 1.379(5)             |
| N1   | C20  | 1.419(4)             | C16  | C17  | 1.393(4)             |
| N2   | C3   | 1.279(4)             | C20  | C21  | 1.386(5)             |
| C1   | C2   | 1.534(4)             | C20  | C25  | 1.386(5)             |
| C2   | C3   | 1.513(4)             | C21  | C22  | 1.391(6)             |
| C2   | C11  | 1.524(4)             | C22  | C23  | 1.367(7)             |
| C3   | C4   | 1.469(4)             | C23  | C24  | 1.380(7)             |
| C4   | C5   | 1.394(4)             | C24  | C25  | 1.381(5)             |
| C4   | C9   | 1.385(4)             |      |      |                      |

Table 3 Bond Angles for CCDC 2159180.

| Atom | Atom | Atom | Angle/°  | Atom | Atom | Atom | Angle/°  |
|------|------|------|----------|------|------|------|----------|
| C14  | O2   | C18  | 118.0(4) | F2   | C10  | C7   | 112.5(3) |
| C16  | O3   | C19  | 117.4(3) | F3   | C10  | F2   | 106.2(3) |
| N2   | N1   | C20  | 118.1(2) | F3   | C10  | C7   | 114.0(3) |
| C1   | N1   | N2   | 112.2(2) | F4   | C10  | F2   | 104.7(4) |
| C1   | N1   | C20  | 129.6(3) | F4   | C10  | F3   | 105.6(3) |
| C3   | N2   | N1   | 109.5(2) | F4   | C10  | C7   | 113.1(3) |
| O1   | C1   | N1   | 128.5(3) | C12  | C11  | C2   | 112.3(2) |
| O1   | C1   | C2   | 126.4(3) | C13  | C12  | C11  | 119.9(3) |
| N1   | C1   | C2   | 105.0(2) | C17  | C12  | C11  | 119.4(3) |
| F1   | C2   | C1   | 109.1(2) | C17  | C12  | C13  | 120.7(3) |
| F1   | C2   | C3   | 112.9(2) | C14  | C13  | C12  | 118.9(3) |
| F1   | C2   | C11  | 108.7(2) | O2   | C14  | C13  | 123.3(4) |
| C3   | C2   | C1   | 100.9(2) | O2   | C14  | C15  | 115.9(3) |
| C3   | C2   | C11  | 114.1(2) | C15  | C14  | C13  | 120.9(3) |
| C11  | C2   | C1   | 110.8(3) | C14  | C15  | C16  | 119.7(3) |
| N2   | C3   | C2   | 111.6(2) | O3   | C16  | C15  | 116.2(3) |
| N2   | C3   | C4   | 121.5(2) | O3   | C16  | C17  | 123.3(3) |
| C4   | C3   | C2   | 126.8(2) | C15  | C16  | C17  | 120.5(3) |
| C5   | C4   | C3   | 121.0(3) | C12  | C17  | C16  | 119.3(3) |
| C9   | C4   | C3   | 119.7(3) | C21  | C20  | N1   | 121.0(3) |
| C9   | C4   | C5   | 119.2(3) | C21  | C20  | C25  | 120.0(3) |
| C6   | C5   | C4   | 120.2(3) | C25  | C20  | N1   | 119.0(3) |
| C5   | C6   | C7   | 120.3(3) | C20  | C21  | C22  | 118.7(4) |
| C6   | C7   | C10  | 119.2(3) | C23  | C22  | C21  | 121.7(4) |
| C8   | C7   | C6   | 120.0(3) | C22  | C23  | C24  | 119.1(4) |
| C8   | C7   | C10  | 120.7(3) | C23  | C24  | C25  | 120.6(4) |
| C7   | C8   | C9   | 120.0(3) | C24  | C25  | C20  | 119.9(4) |
| C8   | C9   | C4   | 120.2(3) |      |      |      |          |

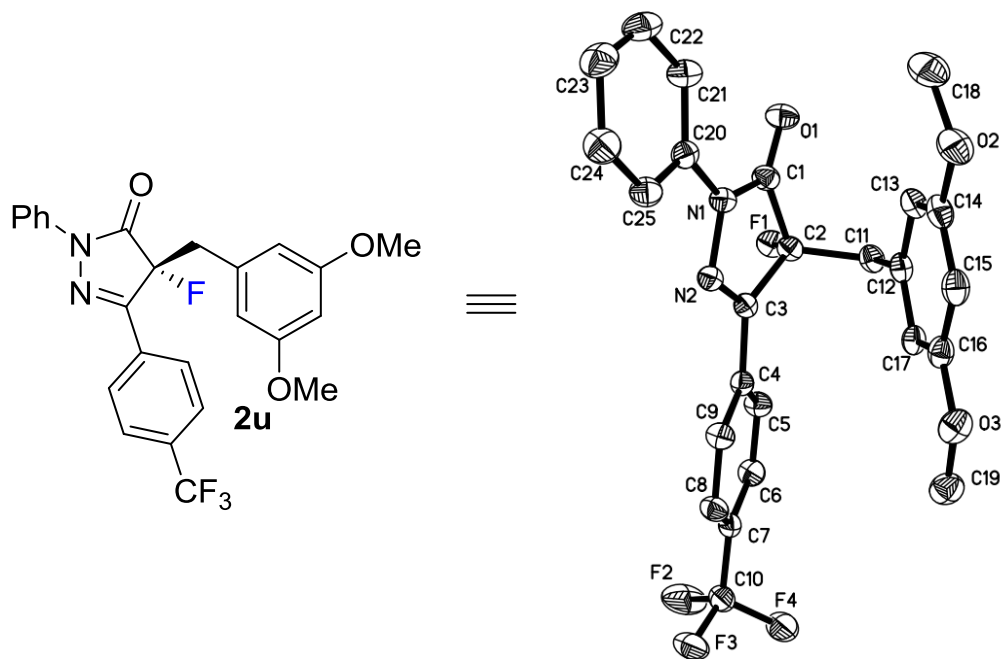

**CCDC: 2159180**

X-ray crystal structures of **2u**; the thermal ellipsoids at the 30% probability level for the crystal structure. Single crystals of **2u** was obtained for X-ray crystallographic analysis, whose absolute configuration was unambiguously determined to be R<sup>30</sup>. On this basis, the other fluoride products from this reaction were assumed to have the same (R)-configuration

## 4. Computation details

The presented models were generated on the basis of calculations using the density functional theory (DFT) method, combined with the 6-31G\* basis set. Only one imaginary frequency (268.69i) corresponding to the reaction coordinates was found for the transition state. Plausible transition state depicted in Scheme 5 was proposed on the basis of calculations using the density functional theory (DFT) method, combined with the 6-31G\* basis set. Only one imaginary frequency (268.69i) corresponding to the reaction coordinates was found for the transition state (Scheme 5). Based on the calculation results, two different types of interactions could exist: (1) an ion-pair interaction between the substrate and the PTC; (2) multiple hydrogen bonding interactions among catalyst, pyrazolone and NFSI. Our proposed model of the transition state (Scheme 5) posits that the pyrazolone substrate is stabilized by the hydrogen bond from the amide function of the catalyst. Moreover, the hydroxyl group of the catalyst forms an hydrogen-bond interaction with the oxygen of NFSI. Consequently, the fluorine can reach the  $\alpha$ -carbon atom of pyrazolone exclusively from above to afford the *R*-product. A key element determining the high enantioselective manner is the ortho-*t*-Bu-phenyl group which blocks the *Si*-face of the enolate. This transition state can be supported by the results with a series of 9-OH and amide modified Cinchona alkaloids

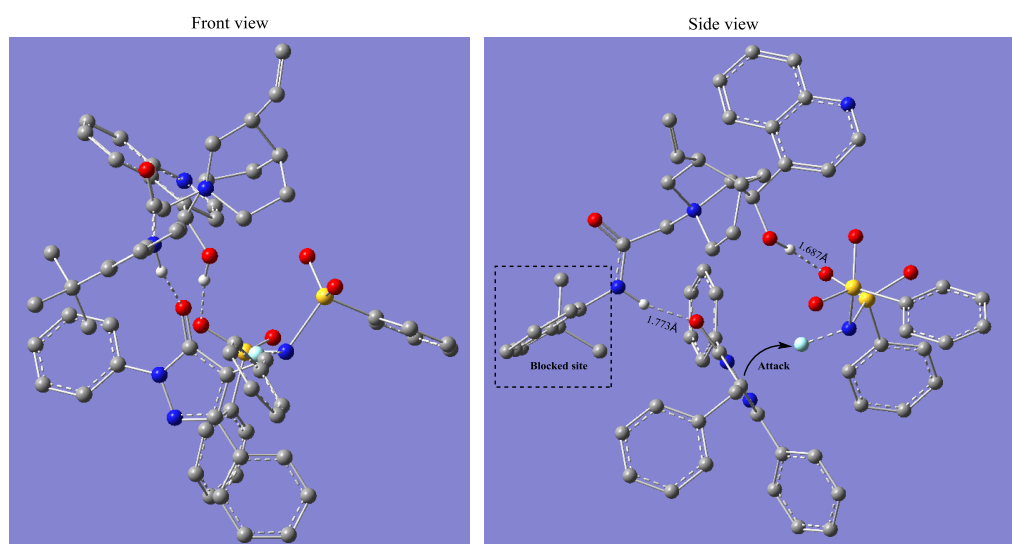

**Scheme A.** Proposed transition-state model of *R*-Product for PTC **3u**, pyrazolone **1a** and NFSI

**Optimized Cartesian Coordinates (Å) *R*-Product** for catalyst PTC **3u**, pyrazolone **1a** and NFSI (These results could be seen in the supporting information).

|                                      |                                      |
|--------------------------------------|--------------------------------------|
| C -1.92561400 -0.13902700 4.88263600 | C 0.13810900 0.38110900 -0.84085800  |
| C -1.88036800 -0.32946300 3.48582000 | C -1.64430300 2.48183200 -5.82597300 |
| C -0.62621600 -0.09090700 2.86379200 | C -1.50586300 2.57496600 -7.23377700 |
| C 0.48253400 0.33190000 3.61391900   | C -0.63633100 1.73344000 -7.89680100 |
| C 0.39775800 0.52212700 4.99201500   | C 0.12957700 0.77397500 -7.18388000  |
| C -0.81994000 0.27777300 5.62861100  | C 0.00351400 0.67706500 -5.75559200  |
| N -0.39896500 -0.27020200 1.44857400 | C -0.90992200 1.55828800 -5.10580100 |
| C -0.09855900 0.76987700 0.62584100  | N 0.97308400 -0.03777100 -7.91064000 |
| O -0.05776900 1.97479200 0.97670200  | C 1.68976900 -0.93998600 -7.24913000 |

---

|                                       |                                       |
|---------------------------------------|---------------------------------------|
| C 1.64384900 -1.10662200 -5.84147700  | H 3.31132700 1.08896700 -4.17413100   |
| C 0.80807800 -0.30656300 -5.08433000  | H 3.37147400 -0.56368900 -3.54616500  |
| C 0.74472800 -0.47040500 -3.56532800  | H 4.49315300 -1.03425300 -1.30281900  |
| C 1.64418600 0.59439800 -2.89162300   | H 4.45323000 0.24532500 -0.08884100   |
| O 1.18807100 -1.74604400 -3.09025300  | H 2.25436600 -0.53544700 0.33703300   |
| N 1.57179900 0.60960200 -1.32019200   | H 2.18526900 -1.41699800 -1.20362800  |
| C 2.11709400 1.98717100 -0.88368500   | H 4.66817000 2.53263200 0.24686800    |
| C 3.46083300 2.29371400 -1.59815400   | H 5.57129200 4.75325200 -0.24224800   |
| C 4.02833300 0.93844900 -2.11696300   | H 4.63819300 4.80663100 -1.83375400   |
| C 3.13588500 0.47238400 -3.28650100   | H -0.35916700 -1.22287500 1.05789400  |
| C 3.96641100 -0.12501800 -0.99838800  | H -0.91702700 0.41315500 6.70126800   |
| C 2.49242500 -0.48767500 -0.72703200  | C -4.38545200 -0.87015800 3.65831300  |
| C 4.39349000 3.04320400 -0.67687900   | H -4.61624100 0.09000000 4.13383300   |
| C 4.89144300 4.25892900 -0.92893100   | H -5.25725000 -1.16596600 3.06478700  |
| H -2.85319800 -0.31266400 5.40986100  | H -4.24927500 -1.62540700 4.44047600  |
| H 1.41745700 0.51127400 3.09511400    | C -3.15426100 -0.77395000 2.72043800  |
| H 1.26587600 0.85037000 5.55358900    | C -2.94682500 -2.18155600 2.09773100  |
| H -0.08198200 -0.67251100 -1.01825200 | H -2.16246800 -2.19466100 1.33974800  |
| H -0.50486800 1.02535300 -1.44585300  | H -2.68643800 -2.91213700 2.87245400  |
| H -2.33741200 3.13937700 -5.31081600  | H -3.87231000 -2.51338400 1.61241700  |
| H -2.08974700 3.30526600 -7.78410700  | C -3.51453500 0.25359100 1.61167400   |
| H -0.50561800 1.76727100 -8.97222500  | H -2.74275100 0.31377800 0.84351300   |
| H -1.04757200 1.50480800 -4.03105700  | H -4.45005900 -0.04674700 1.12452400  |
| H 2.34116000 -1.57427200 -7.84143100  | H -3.65331500 1.25345700 2.03819900   |
| H 2.27259800 -1.85571100 -5.37581900  | N -1.18463000 -4.59115700 -0.55967000 |
| H -0.29725500 -0.30841500 -3.25846800 | N -1.04415800 -5.98427400 -0.42743300 |
| H 1.24760500 1.57811100 -3.16571300   | C 0.16556100 -6.17726700 0.13388300   |
| H 0.84373900 -2.53182600 -3.60282000  | C 0.84578800 -4.94369100 0.36704100   |
| H 1.34308200 2.72786200 -1.08638500   | C -0.07476500 -3.91019300 -0.04771200 |
| H 2.23690900 1.94038900 0.19792700    | O 0.02240500 -2.63500700 0.05680800   |
| H 3.26898100 2.93136500 -2.47163100   | C -2.35851600 -4.06088100 -1.14820900 |
| H 5.05851900 1.07408100 -2.45851300   | C 2.09989600 -4.66589700 1.14730000   |

---

|                                       |                                        |
|---------------------------------------|----------------------------------------|
| C 0.63461500 -7.55251900 0.37400500   | H -3.39272400 -1.56794400 -3.22015200  |
| C 1.88980700 -4.69610300 2.66047800   | H -1.31554500 -2.51099600 -2.21181600  |
| C 1.31414200 -3.59884200 3.32406400   | C -0.56432400 -9.26604700 -4.38897400  |
| C 1.11163900 -3.62292100 4.70771600   | C 0.33627400 -8.97590400 -5.42351900   |
| C 1.48211000 -4.75038500 5.45164200   | C 0.98031500 -7.73423200 -5.46660500   |
| C 2.05565900 -5.84915400 4.80179900   | C 0.67956200 -6.82117500 -4.45933600   |
| C 2.25776200 -5.82104300 3.41681400   | C -0.20722900 -7.06732100 -3.41993900  |
| C -0.24470900 -8.52010600 0.89630500  | C -0.83382300 -8.31947900 -3.39271100  |
| C 0.18762000 -9.83182000 1.10893800   | S 1.54748100 -5.16625400 -4.54313000   |
| C 1.50422900 -10.19877200 0.80303300  | O 2.47415400 -5.14794800 -5.89918500   |
| C 2.38186800 -9.24707400 0.26947800   | O 0.41344300 -3.98834800 -4.33716400   |
| C 1.95103200 -7.93507200 0.05062000   | S 4.34287900 -3.85656200 -3.20728100   |
| C -3.59354400 -4.68230300 -0.90714100 | O 4.10592200 -2.68377000 -4.33146000   |
| C -4.75251700 -4.16904100 -1.49475300 | O 4.71989100 -3.39938300 -1.67741900   |
| C -4.68993200 -3.03576000 -2.31557600 | C 5.70531000 -4.97852500 -3.83348000   |
| C -3.45242000 -2.42888600 -2.56134500 | C 5.70117000 -5.32184800 -5.18226900   |
| C -2.28374600 -2.94001500 -1.98970300 | C 6.72960500 -6.15703000 -5.63557300   |
| H 2.87823800 -5.38498200 0.87999200   | C 7.70961300 -6.61852300 -4.74590400   |
| H 2.47121000 -3.68125500 0.84422100   | C 7.67413500 -6.25377200 -3.39338800   |
| H 1.02298100 -2.72537800 2.74996900   | C 6.65435900 -5.42068600 -2.91743100   |
| H 0.66922300 -2.76254900 5.20052600   | H -1.05323700 -10.23420500 -4.35813300 |
| H 1.32663300 -4.77125900 6.52609900   | H 0.53887700 -9.71056300 -6.19540800   |
| H 2.34690900 -6.72722100 5.37076700   | H 1.68042200 -7.47178200 -6.25078800   |
| H 2.69967200 -6.67842500 2.91767500   | H -0.41437200 -6.34610400 -2.63798300  |
| H -1.26018900 -8.22728800 1.13925000  | H -1.51901200 -8.53961700 -2.58235800  |
| H -0.49935800 -10.56541900 1.51988700 | H 4.91813100 -4.96572200 -5.84254700   |
| H 1.84114100 -11.21651500 0.97439300  | H 6.76108600 -6.44542400 -6.68059700   |
| H 3.39802400 -9.52904200 0.01097100   | H 8.50169700 -7.26604000 -5.10736500   |
| H 2.61629400 -7.21179100 -0.40711000  | H 8.43659700 -6.61188300 -2.71004100   |
| H -3.62518000 -5.55958600 -0.27296700 | H 6.59879500 -5.11039200 -1.88048300   |
| H -5.70586300 -4.65364000 -1.30838800 | N 2.76686600 -5.21274500 -2.98149700   |
| H -5.59263700 -2.63842000 -2.76834900 | F 1.87153300 -4.87041700 -1.707875     |



Next, we also calculated the Proposed transition-state model of *S*-Product for **PTC 3u**, pyrazolone **1a** and NFSI. As we can see, Because of the distance (O atom of pyrazolone with N-H of the catalyst) is relatively far (4.589 Å). It's hard to form effective hydrogen bond between O and N-H. Moreover, the ortho-*t*-Bu-phenyl group could not block the *Re*-face of the enolate effectively. This transition state can be supported by the results with a series of 9-OH and amide modified Cinchona alkaloids (Scheme 4) in manuscript.

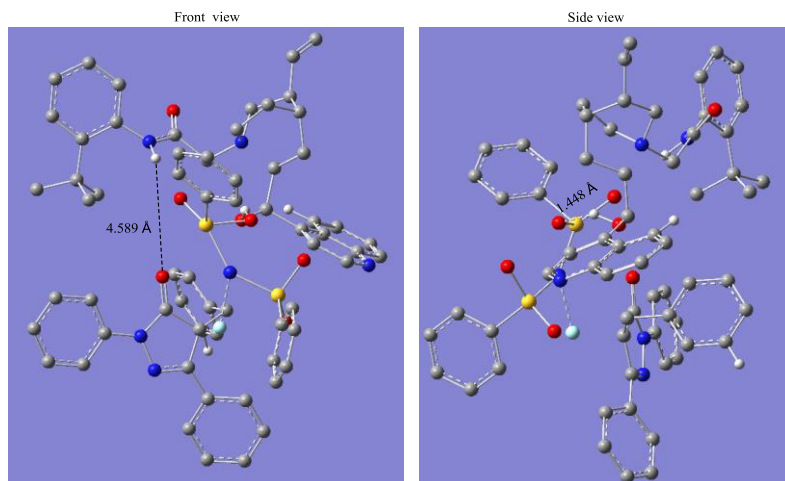

**Scheme B.** Proposed transition-state model of *S*-Product for **PTC 3u**, pyrazolone **1a** and NFSI

**Optimized Cartesian Coordinates (Å)** *S*-Product for catalyst PTC 3u, pyrazolone 1a and NFSI

|                                      |                                       |
|--------------------------------------|---------------------------------------|
| C 0.41200700 -1.37339000 -0.28950300 | O 3.30238800 1.22219500 6.79848400    |
| C 0.64004600 -0.86801800 1.00743100  | N 3.69014700 -1.73675700 6.07219100   |
| C 1.63702500 -1.53373000 1.77105900  | C 3.74999800 -3.26529600 6.25128800   |
| C 2.32059300 -2.64452400 1.25143600  | C 5.00561700 -3.64408000 7.09086200   |
| C 2.05717500 -3.12398500 -0.02991200 | C 6.01594800 -2.45540400 6.98965200   |
| C 1.09759000 -2.47499100 -0.80725200 | C 5.44663000 -1.24805400 7.77788400   |
| N 2.00855000 -1.10611900 3.09566600  | C 6.14101000 -2.02673600 5.51461500   |
| C 1.98333100 -1.93445200 4.17430400  | C 4.83342900 -1.32355100 5.11082800   |
| O 1.64308900 -3.14556100 4.16109400  | C 5.57409100 -4.96639000 6.63323100   |
| C 2.35515200 -1.26278300 5.49815800  | C 5.71123200 -6.04192600 7.41681400   |
| C 1.97298500 -1.39856000 11.74368100 | H -0.33091600 -0.90185000 -0.91760800 |
| C 2.57537900 -0.92024800 12.93457600 | H 3.05972400 -3.13320700 1.87411000   |
| C 3.51978300 0.08416800 12.87288600  | H 2.59588900 -3.98471300 -0.41231200  |
| C 3.90671600 0.64248400 11.62598900  | H 2.43923400 -0.17803100 5.42453100   |
| C 3.31917900 0.14838100 10.41105100  | H 1.58554800 -1.53044800 6.22681000   |
| C 2.33488100 -0.87821800 10.51508700 | H 1.21453800 -2.17323800 11.79972500  |
| N 4.84093500 1.65562500 11.64158200  | H 2.28236900 -1.33997800 13.89142000  |
| C 5.19202600 2.19655400 10.47843500  | H 3.99407900 0.48756800 13.76020500   |
| C 4.68020300 1.76413400 9.22665200   | H 1.83642000 -1.24418100 9.62339100   |
| C 3.75932100 0.73490000 9.17467600   | H 5.90662900 3.01088300 10.50100400   |
| C 3.23948300 0.23723000 7.82222300   | H 5.02019200 2.26218800 8.32666500    |
| C 3.93049900 -1.14092500 7.51056700  | H 2.16814000 0.02945100 7.93329000    |

---

|                                      |                                      |
|--------------------------------------|--------------------------------------|
| H 3.41709500 -1.85919300 8.15778300  | C -0.54741200 3.64141800 8.73747000  |
| H 4.22042600 1.44980500 6.33474600   | C -0.86925100 7.92489800 8.32790000  |
| H 2.81725900 -3.58189400 6.72141900  | C -1.21388200 8.57890000 9.50973800  |
| H 3.77034200 -3.69723700 5.25092600  | C -0.37972600 8.49035500 10.63351600 |
| H 4.71744700 -3.75309600 8.14477600  | C 0.80436700 7.74883300 10.56169300  |
| H 6.98434400 -2.76009800 7.39642300  | C 1.16235200 7.09205100 9.37906300   |
| H 5.59743500 -1.37098100 8.85436900  | C -0.63861200 7.55421300 3.23600700  |
| H 5.96130500 -0.32773200 7.47901500  | C -1.02530700 7.87940500 1.93445000  |
| H 6.96339100 -1.31409700 5.39203500  | C -0.57324400 7.12411700 0.84605000  |
| H 6.35769200 -2.88616300 4.87046500  | C 0.27578400 6.03584600 1.07170200   |
| H 4.50249100 -1.57540700 4.10370100  | C 0.67699800 5.69369700 2.36678400   |
| H 4.93243900 -0.23824500 5.17590500  | H 2.48939500 3.49624000 7.21492300   |
| H 5.88872100 -5.02007500 5.59058200  | H 2.04597600 4.45911200 8.63983300   |
| H 6.13667500 -6.96938900 7.04687200  | H 0.84472100 2.12286500 6.02446100   |
| H 5.40360600 -6.03552500 8.45996500  | H -1.28777600 0.84179200 6.14824400  |
| H 2.48509500 -0.18927300 3.19919700  | H -2.93727400 1.34282500 7.94490700  |
| H 0.87481100 -2.82229300 -1.81142300 | H -2.44995300 3.13011700 9.60801200  |
| C -1.33494600 0.70852500 0.54524300  | H -0.33862700 4.41957000 9.46436900  |
| H -2.02277000 -0.13270900 0.40074300 | H -1.51666500 7.97971400 7.46028900  |
| H -1.90627300 1.54113900 0.97018900  | H -2.13541100 9.14986000 9.55932600  |
| H -0.96803800 1.03267800 -0.43479100 | H -0.65332400 8.99392600 11.55522200 |
| C -0.17685500 0.35162400 1.51477500  | H 1.46070600 7.67980800 11.42280500  |
| C 0.73562200 1.60657600 1.61583300   | H 2.10375300 6.55225600 9.34030200   |
| H 1.57851500 1.48163500 2.30014800   | H -0.98166400 8.13660700 4.07997800  |
| H 1.14465600 1.85362800 0.62818000   | H -1.68252900 8.72791400 1.77400700  |
| H 0.14358200 2.46365100 1.96197200   | H -0.87756800 7.38131600 -0.16299500 |
| C -0.83636800 0.05410000 2.89087900  | H 0.63552600 5.44229800 0.23784400   |
| H -0.09425600 -0.09459500 3.67600800 | H 1.33327100 4.85142100 2.53298100   |
| H -1.47252000 0.89998500 3.17922000  | C 7.05491700 9.86771200 8.00509600   |
| H -1.46345500 -0.84352800 2.83482000 | C 7.80595300 8.72987700 7.68152100   |
| N 0.60258000 6.13483400 4.78325400   | C 7.23536700 7.45651700 7.79411800   |
| N 0.18529100 6.95997200 5.84126900   | C 5.91921300 7.36966500 8.23644900   |
| C 0.66514100 6.50877200 6.98867200   | C 5.14717400 8.47709500 8.57097400   |
| C 1.48635100 5.30052600 6.75859500   | C 5.73244300 9.74366300 8.45045800   |
| C 1.36227400 5.06905500 5.24800100   | S 5.15166600 5.66600100 8.34936800   |
| O 1.85429200 4.13288300 4.60683900   | O 6.39328500 4.59419700 8.49613000   |
| C 0.21260900 6.45835000 3.45021000   | O 3.99304900 5.76202400 9.51715100   |
| C 1.71462500 4.13881900 7.65073700   | S 4.58855400 2.26375100 3.91795300   |
| C 0.32214500 7.17170600 8.25032200   | O 5.31171200 1.69238100 5.39034400   |
| C 0.38936600 3.35719300 7.72918400   | O 3.68610100 1.02510400 3.18997300   |
| C 0.11351700 2.34465100 6.79347600   | C 6.13845000 2.21910500 2.85608700   |
| C -1.08131400 1.62118700 6.87529500  | C 7.33851500 2.67734400 3.39844100   |
| C -2.00971400 1.90357000 7.88540400  | C 8.48102900 2.67962700 2.58843600   |
| C -1.73814400 2.91163100 8.81835200  | C 8.40652800 2.22513400 1.26453200   |

---

C 7.19133100 1.75958800 0.74580100  
C 6.04197600 1.75382300 1.54714100  
H 7.50222400 10.85212700 7.91407300  
H 8.83250300 8.83031200 7.34580500  
H 7.79254200 6.55479000 7.56818600  
H 4.13341800 8.35232500 8.93197400  
H 5.15749800 10.62683500 8.70764500

H 7.37437100 2.99634900 4.43384900  
H 9.42651200 3.02852800 2.99197000  
H 9.29489400 2.23031300 0.64036500  
H 7.13830800 1.39745500 -0.27631300  
H 5.09033900 1.37736500 1.18857700  
N 4.45810500 5.17586500 6.67515900  
F 3.13827400 6.11002200 6.62204100

## 5. NMR spectra for compounds

### 5.1 NMR spectra for catalysts

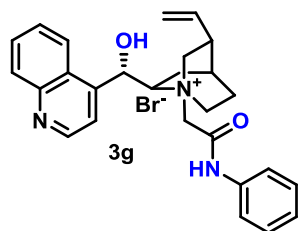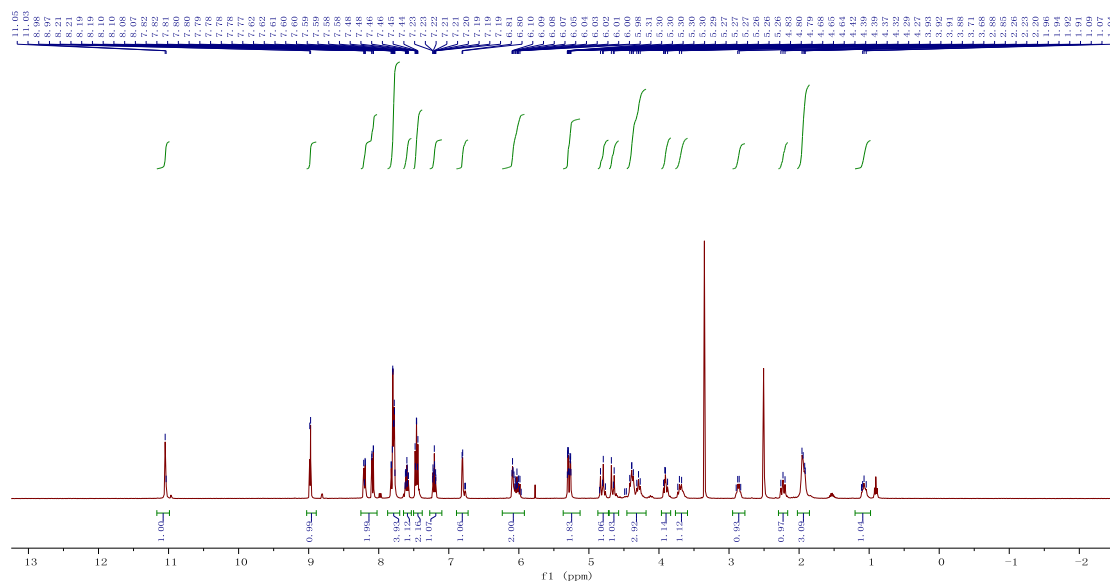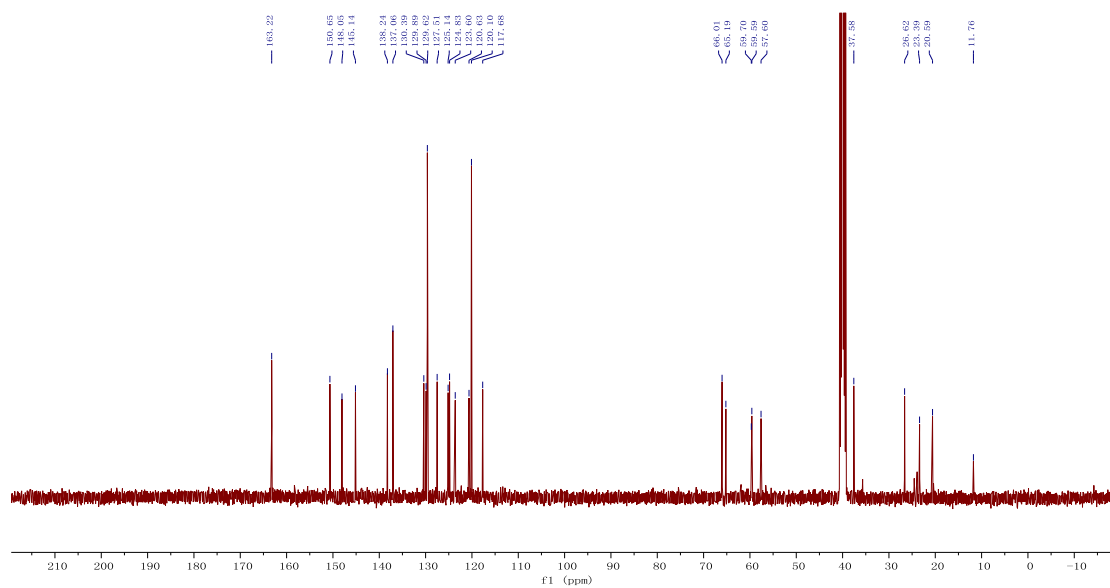

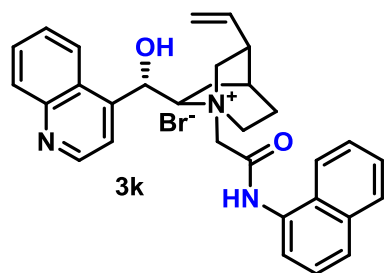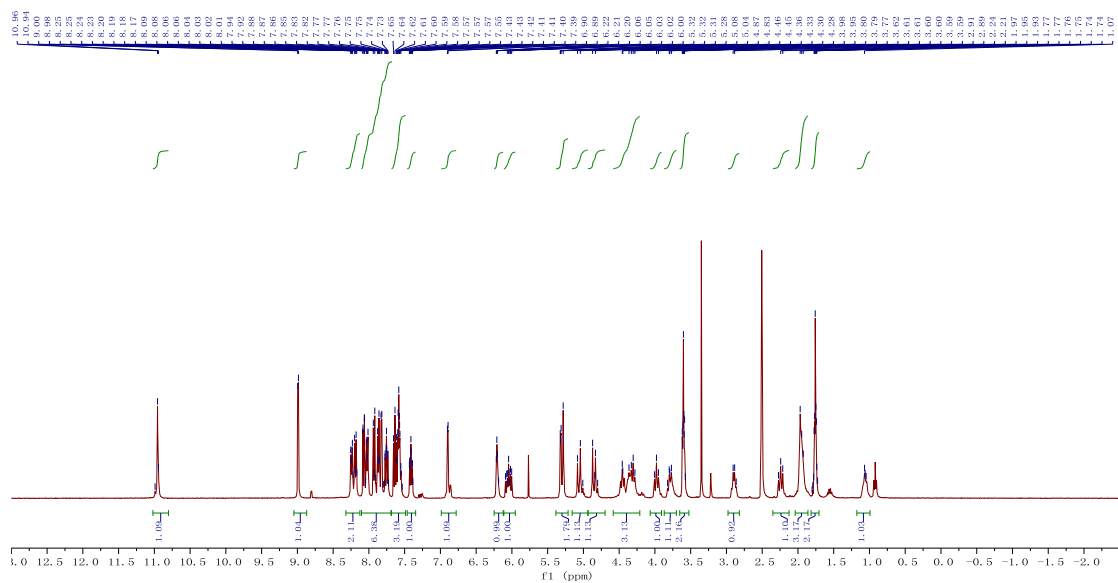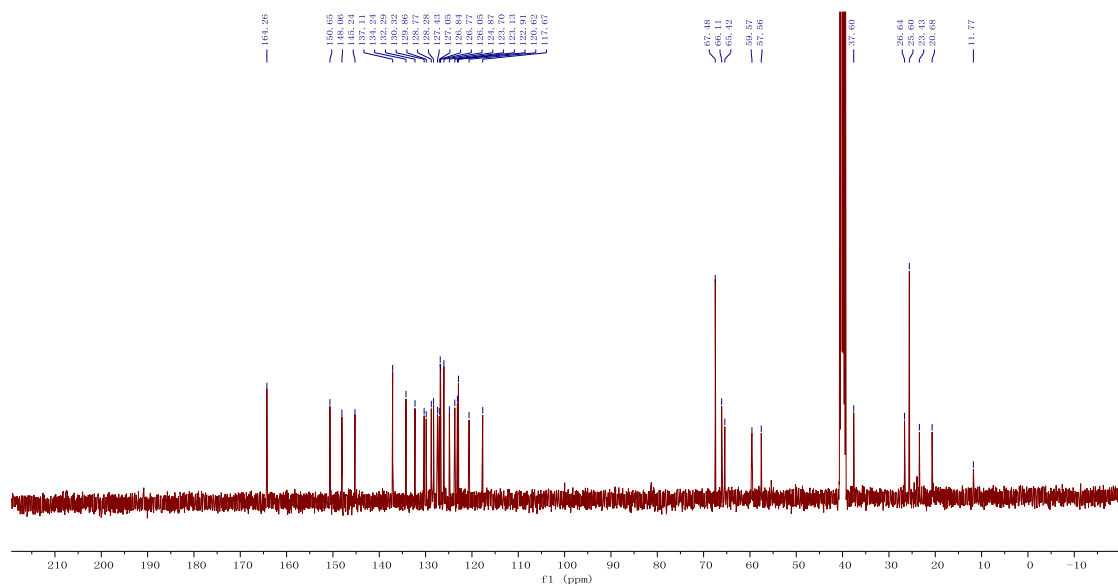





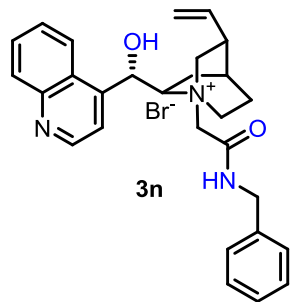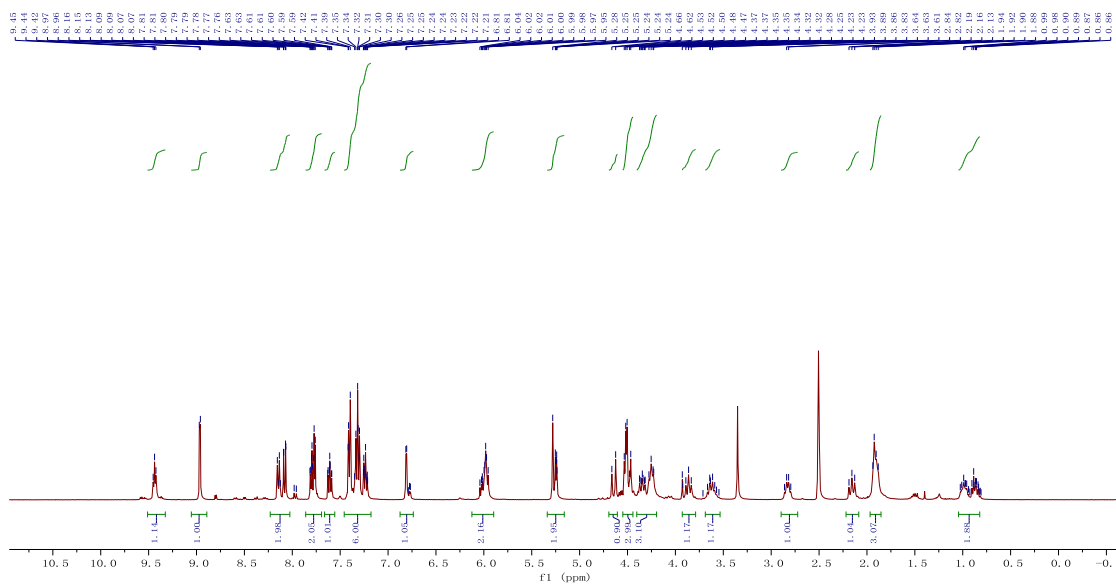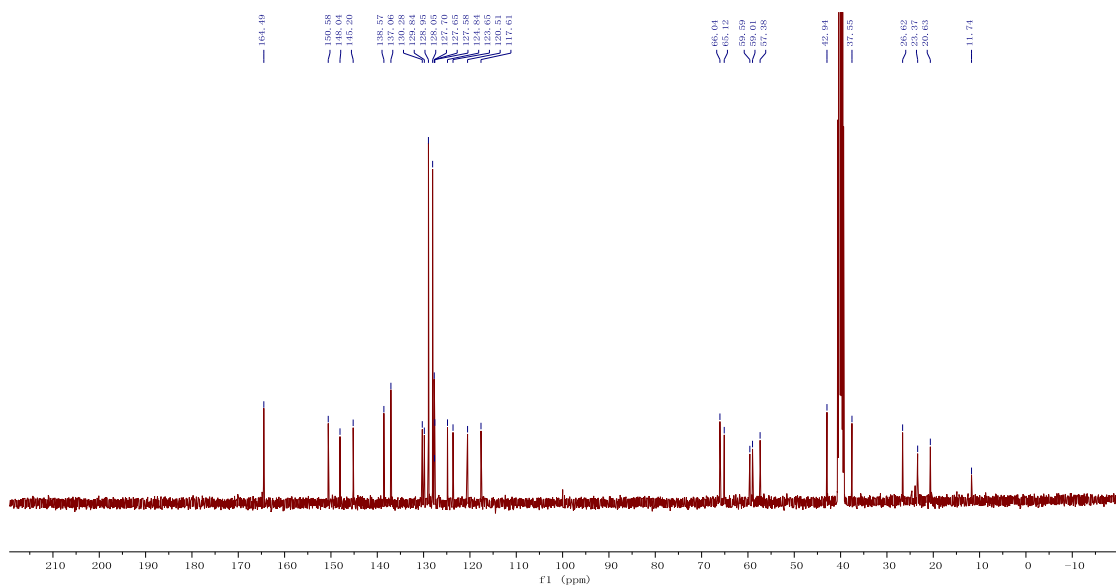



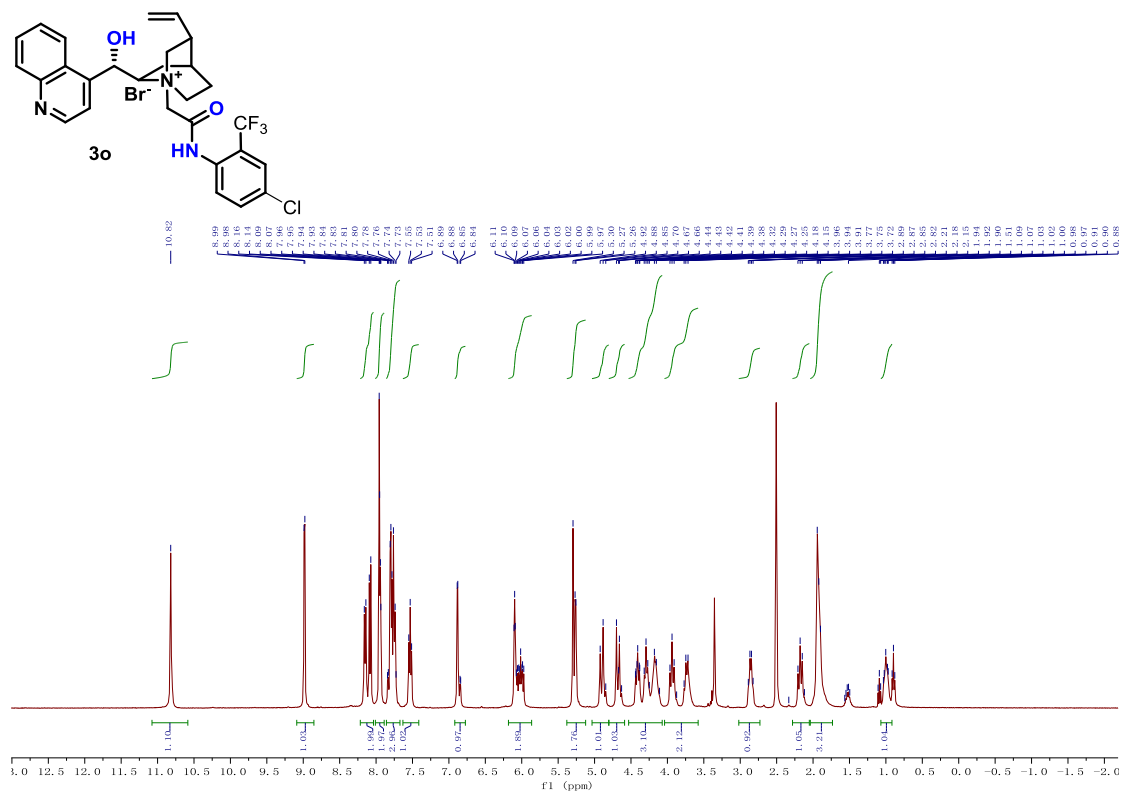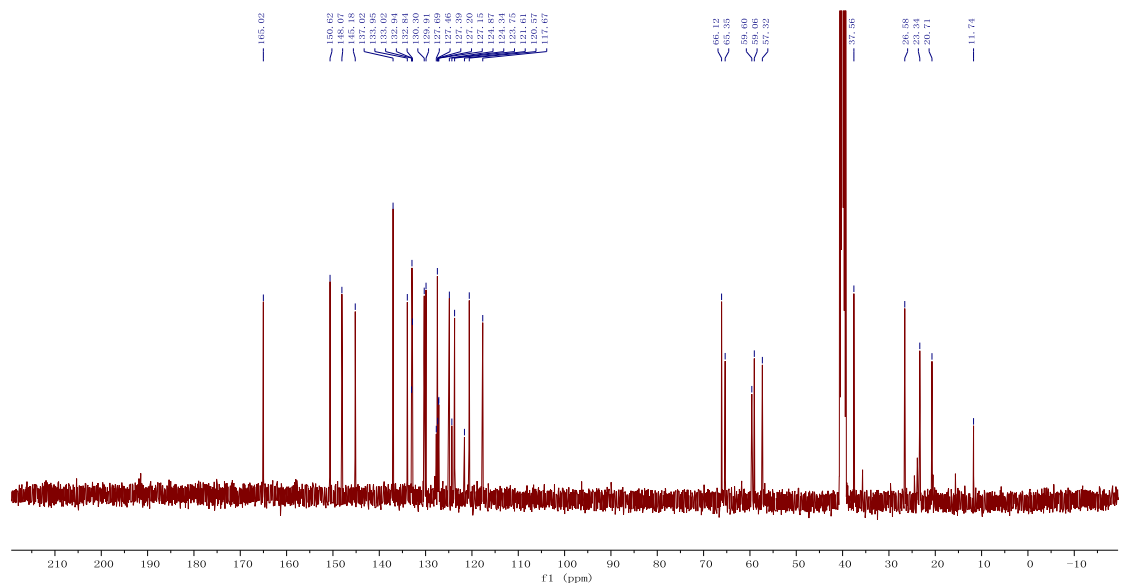

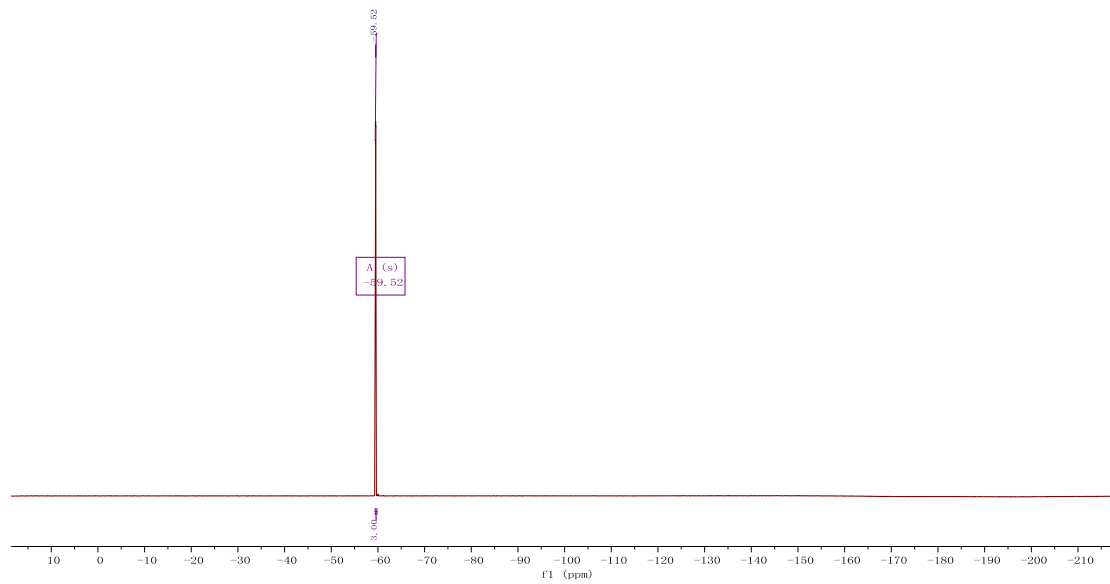

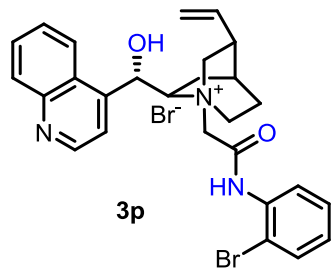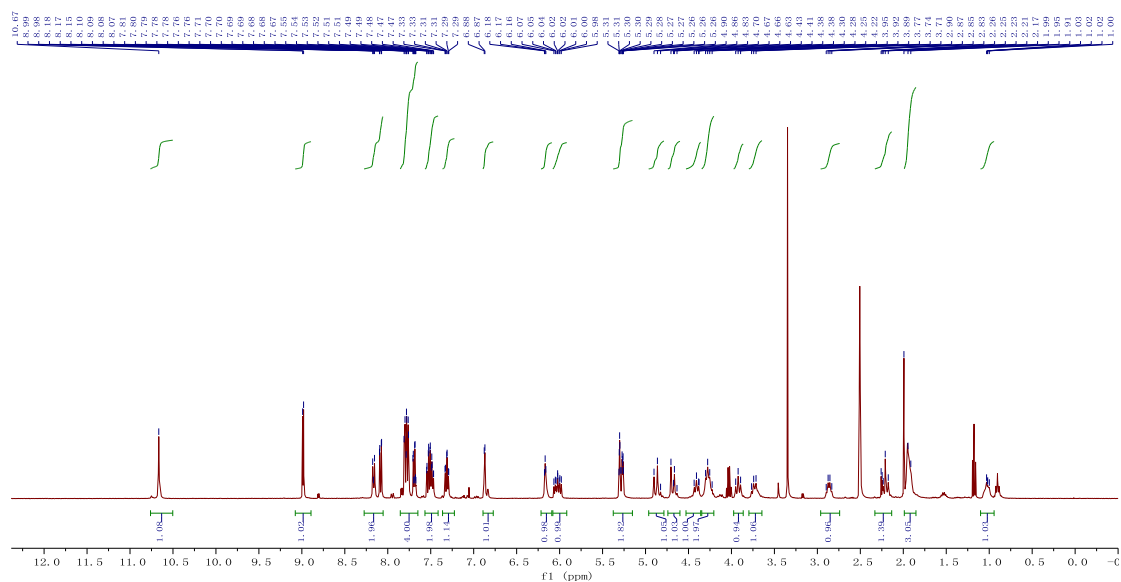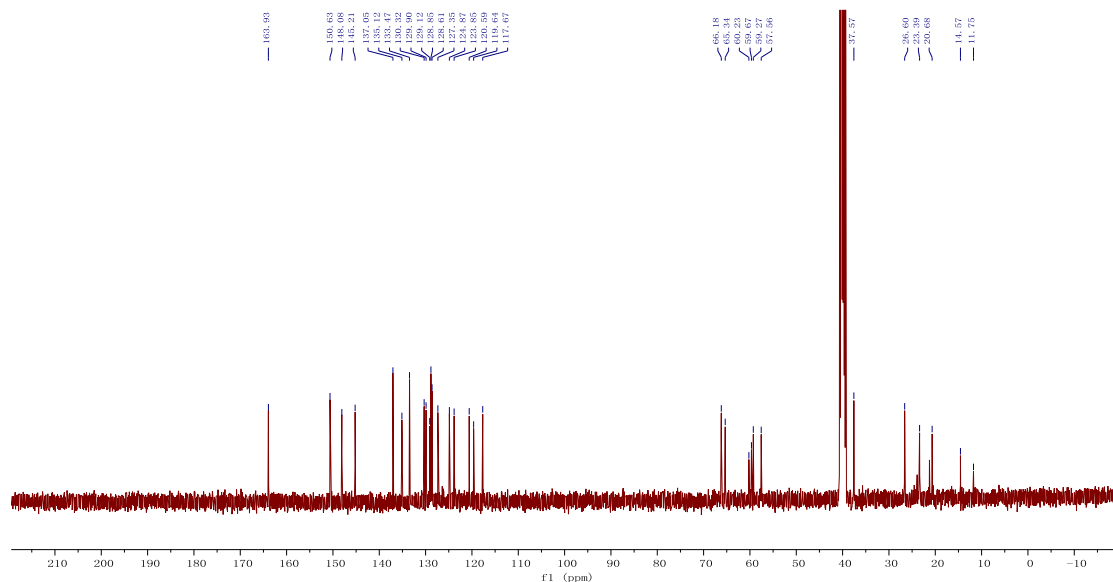

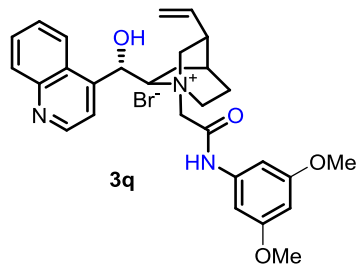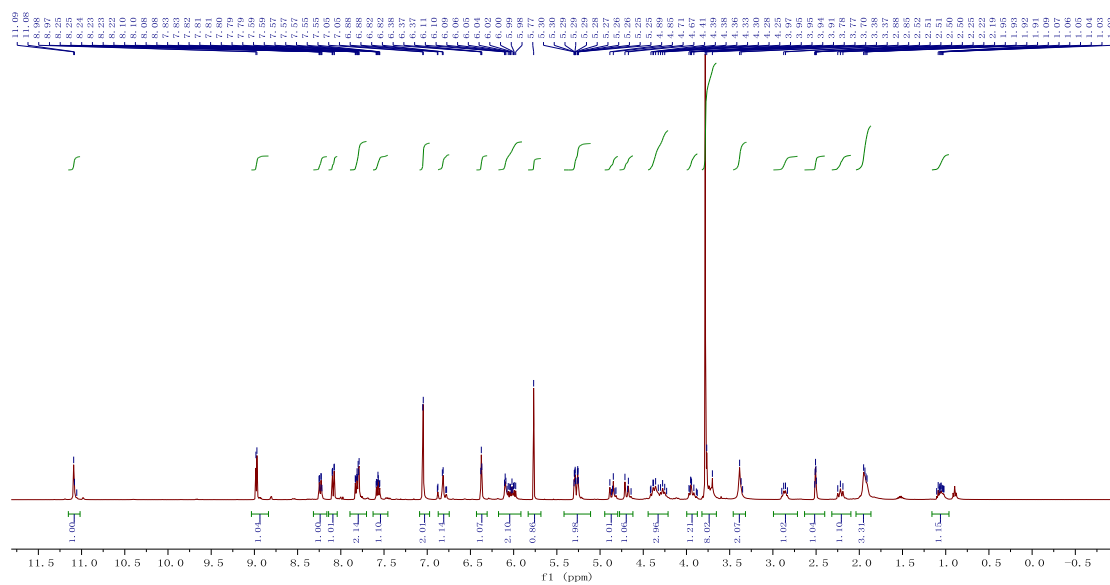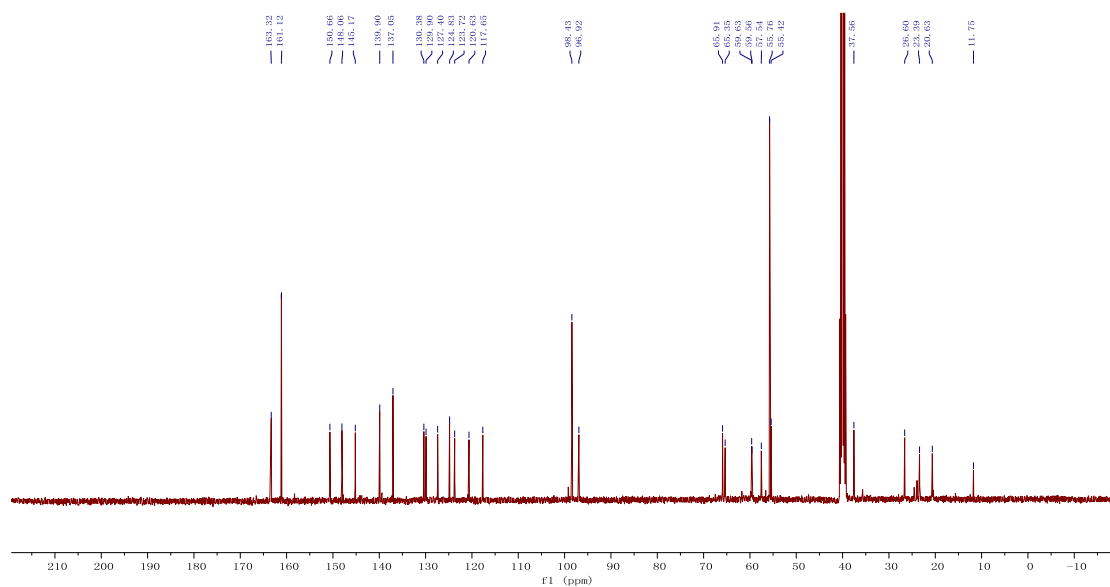



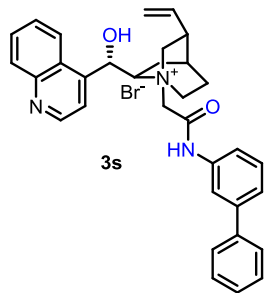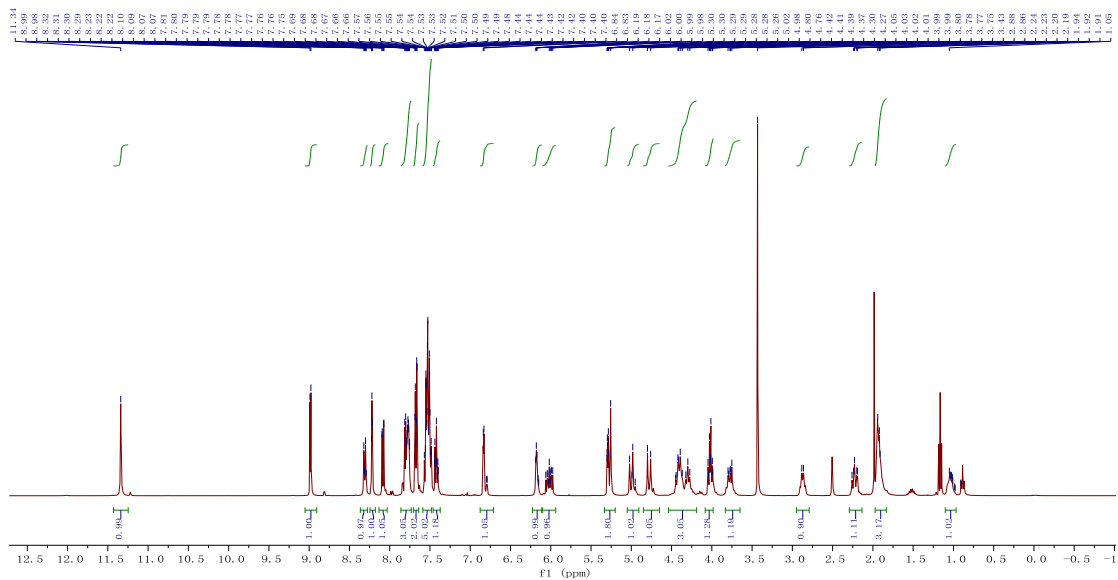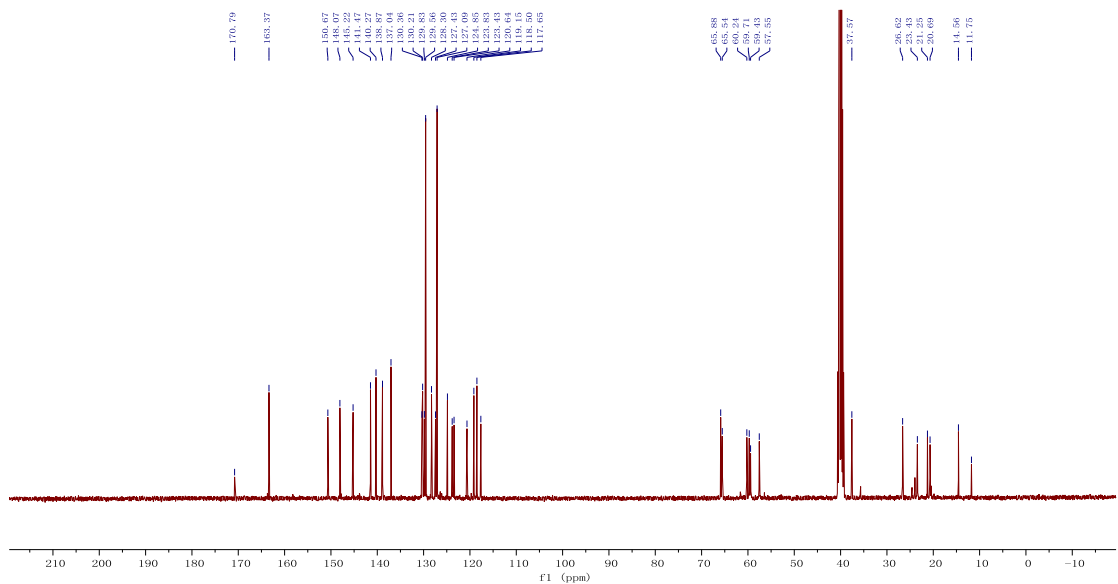



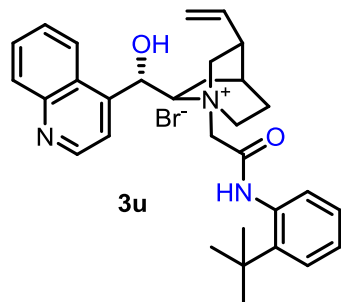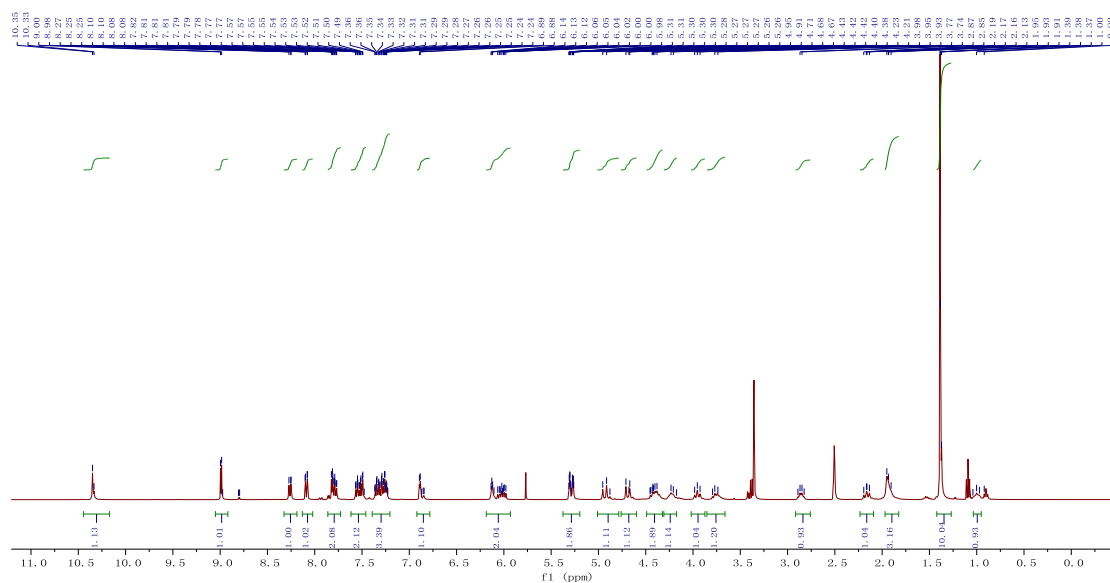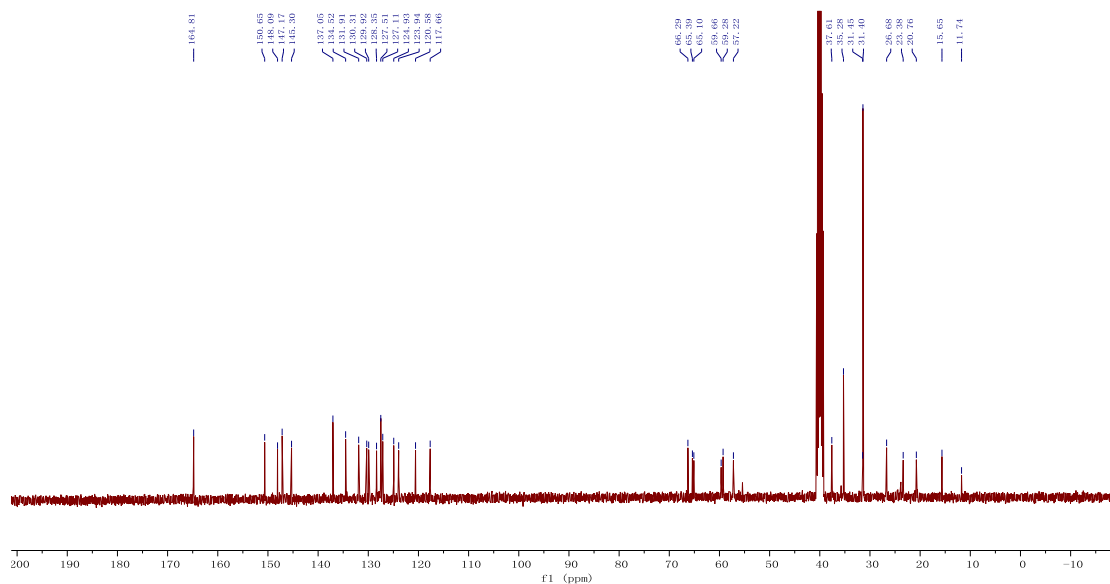









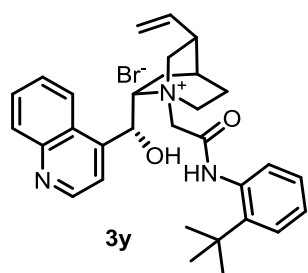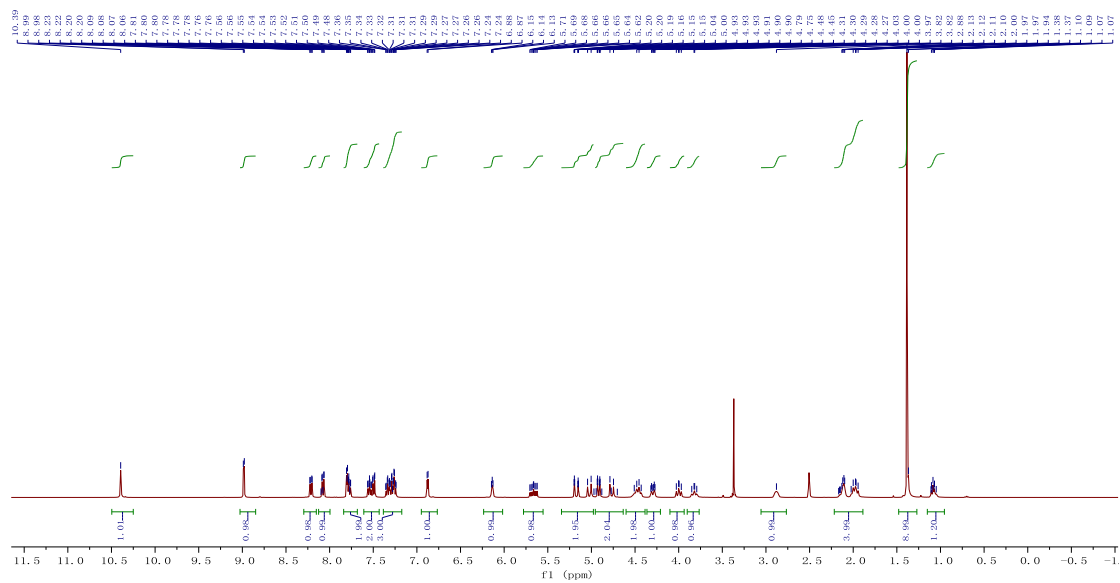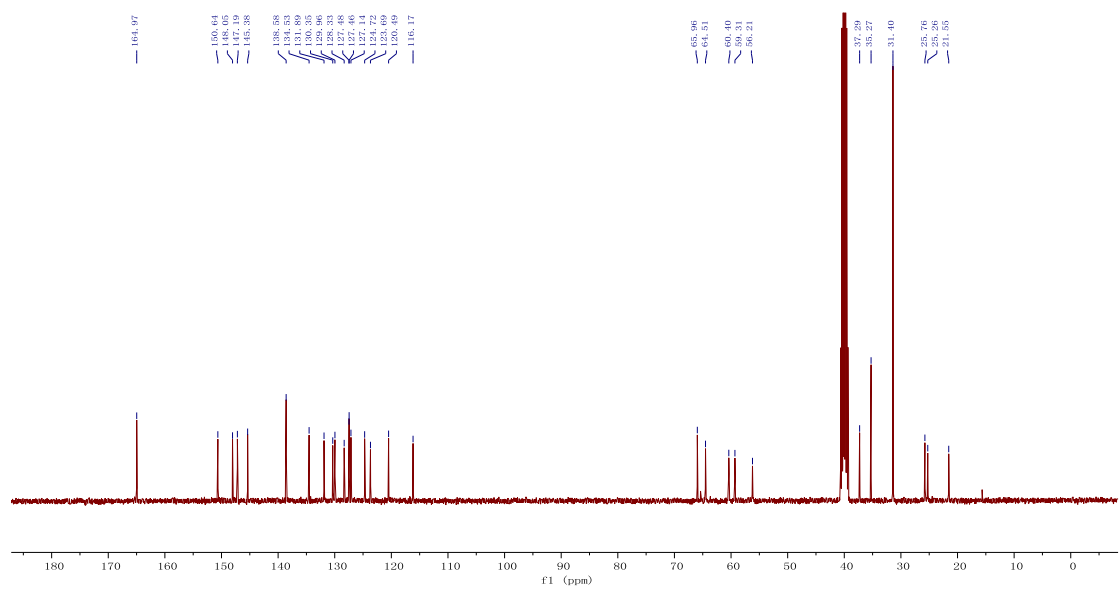

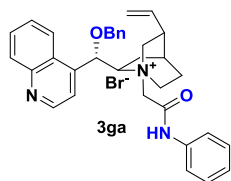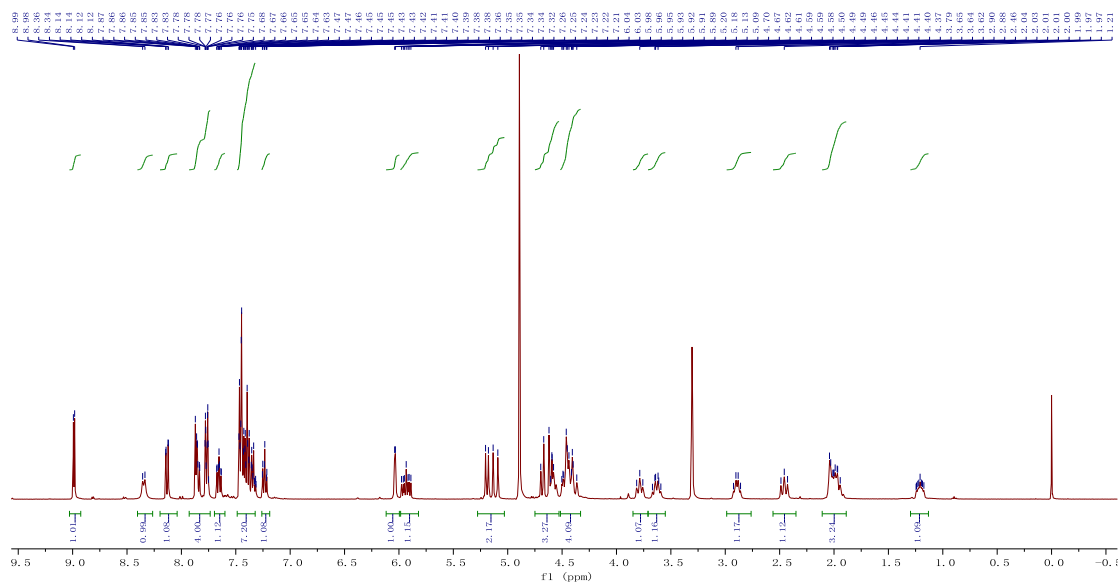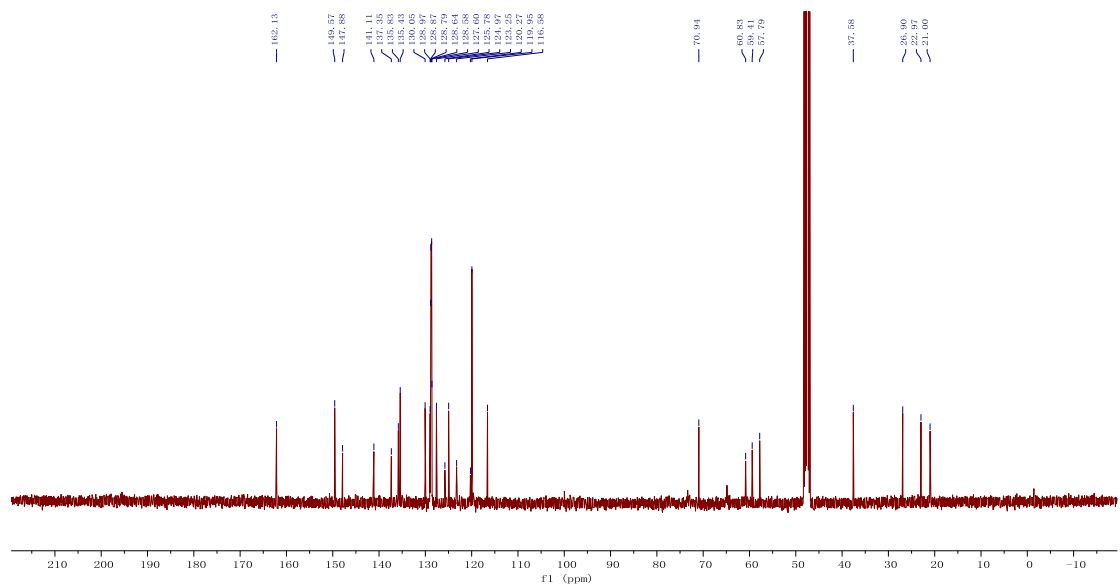

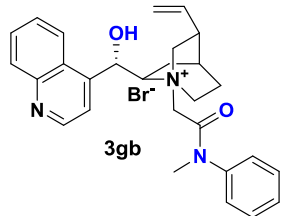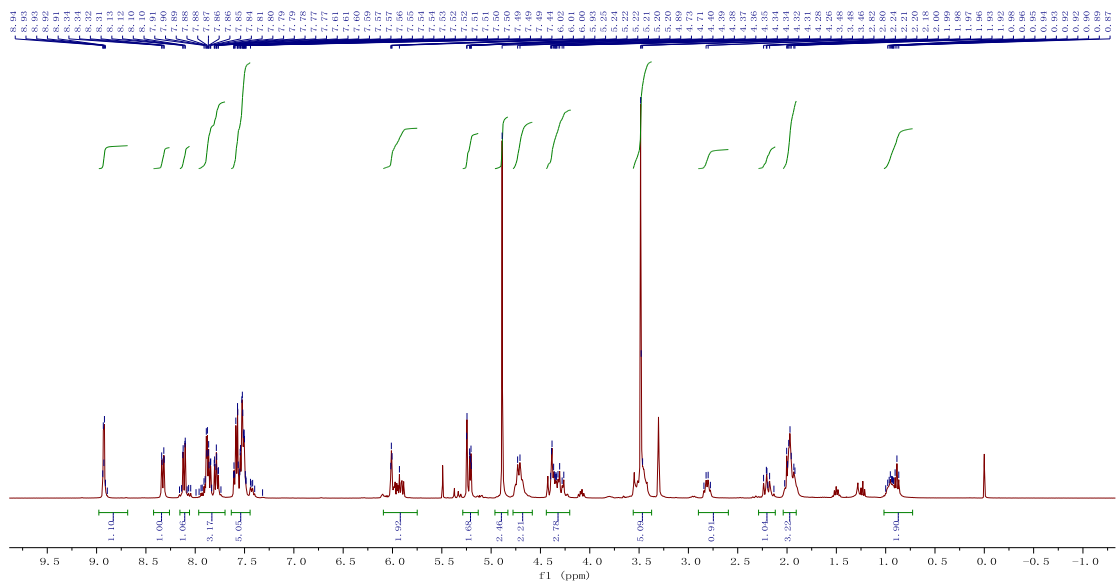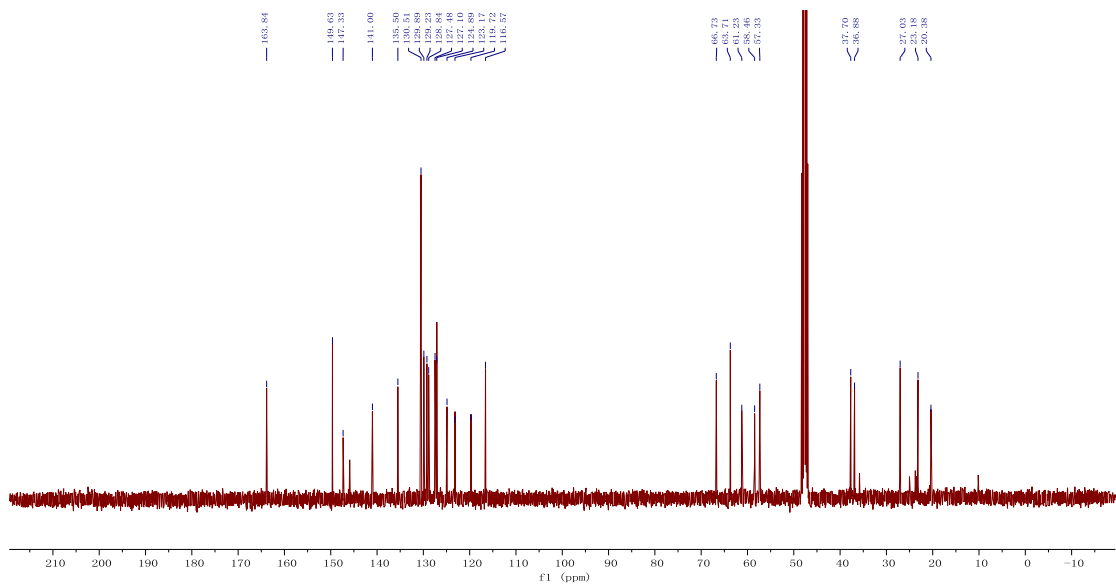















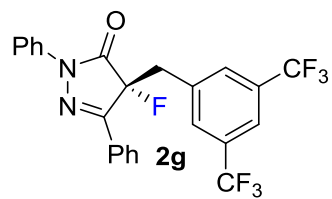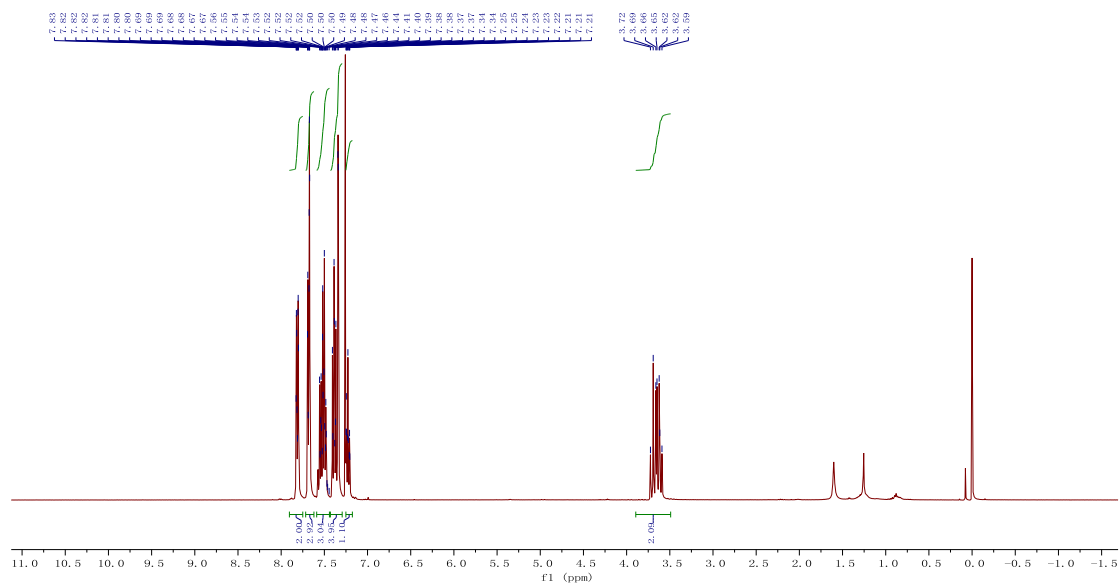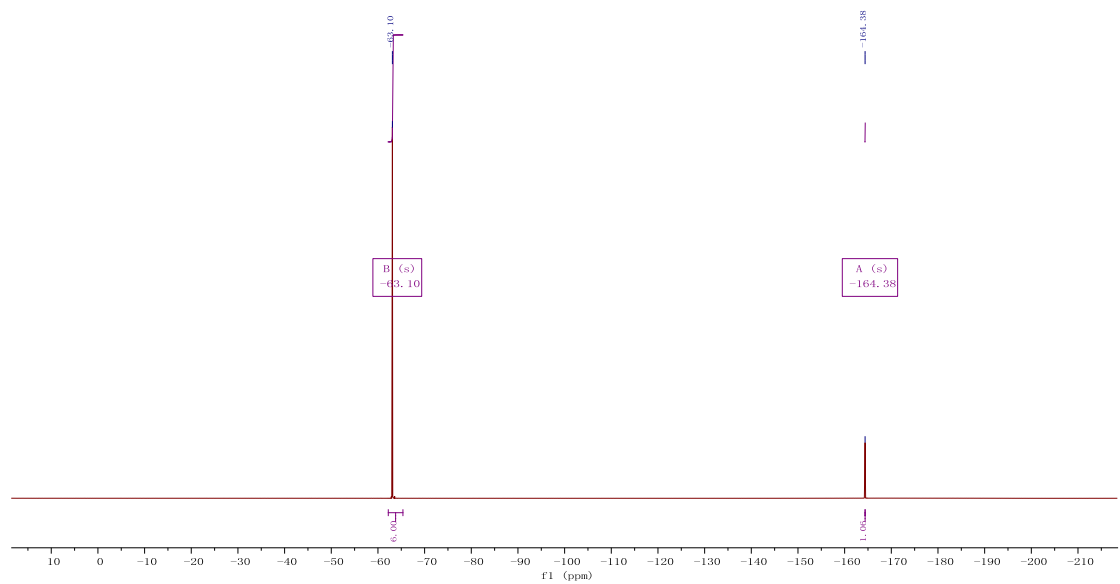

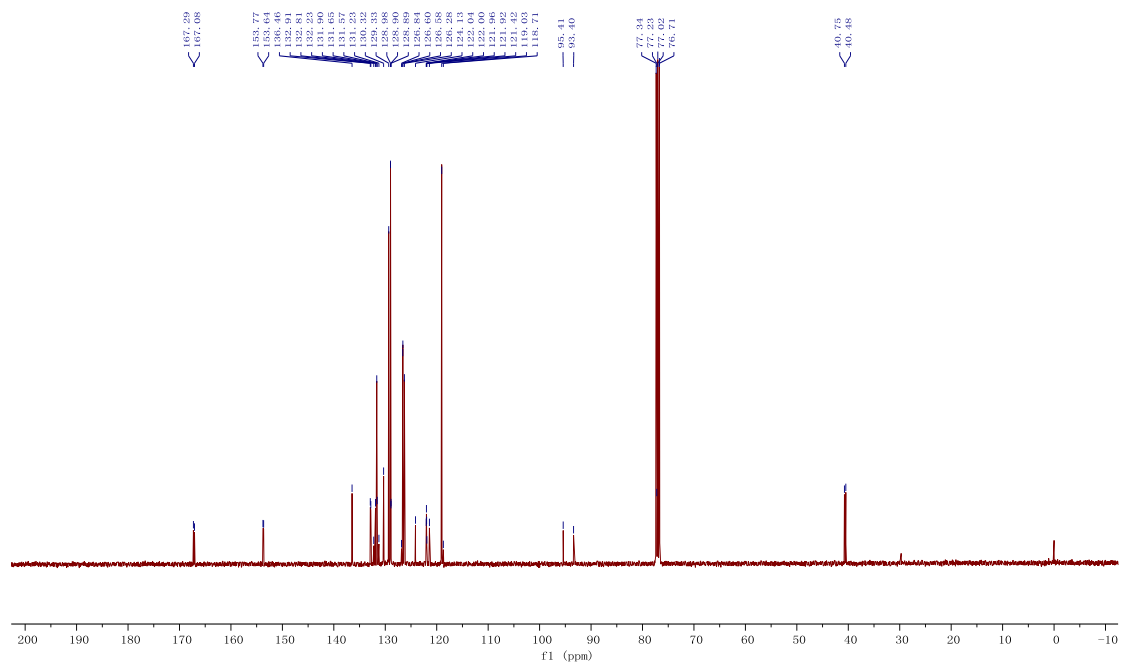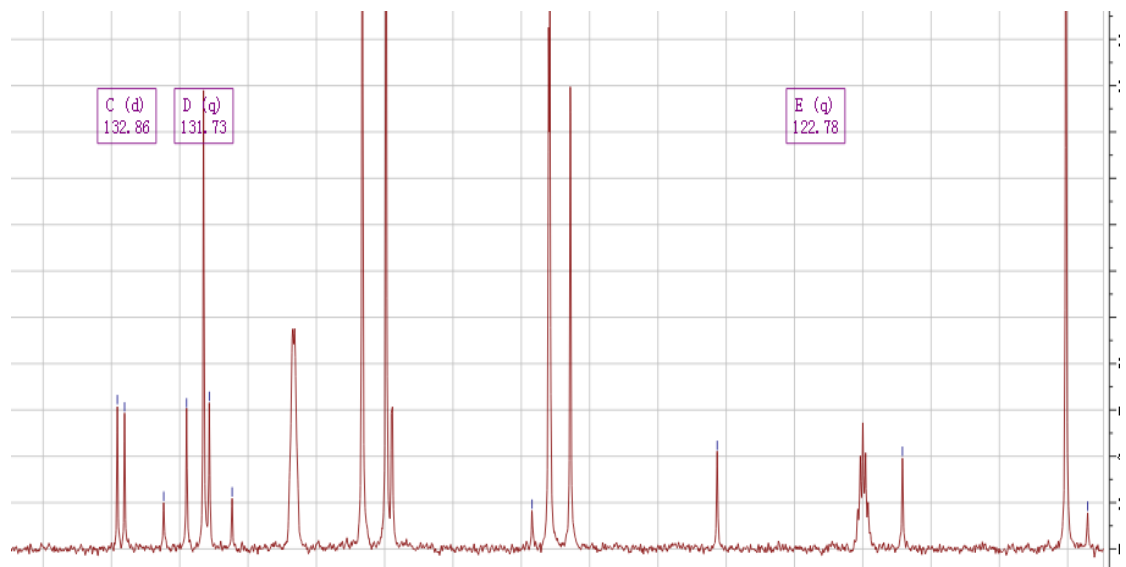







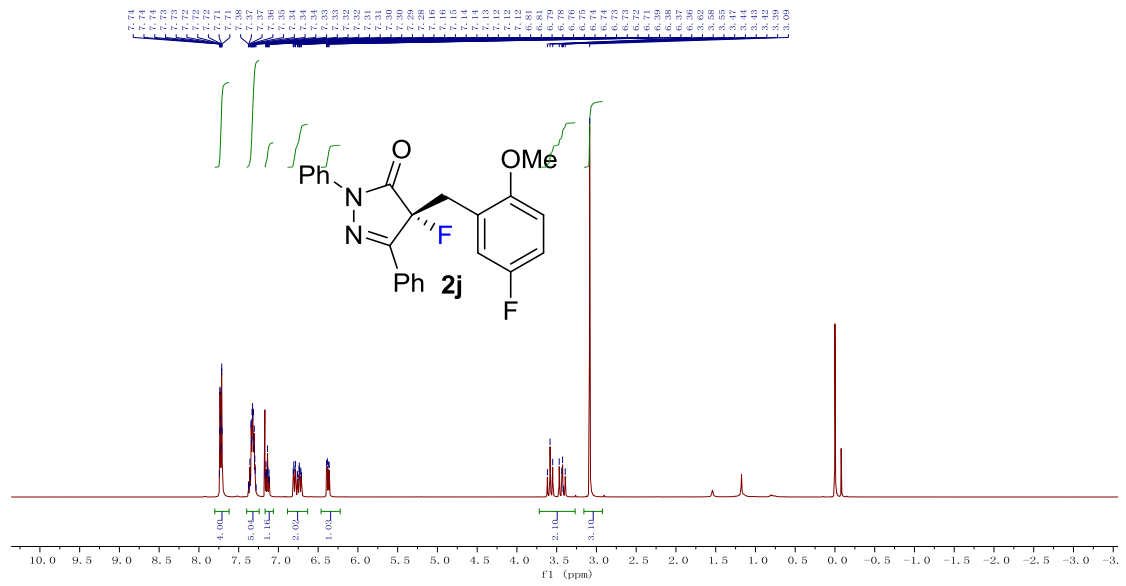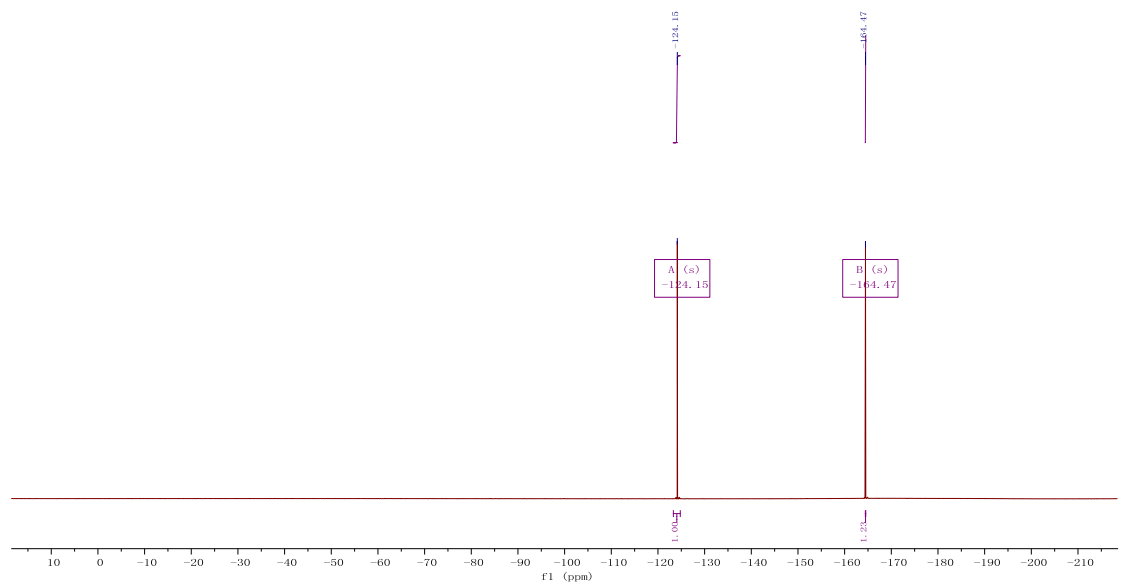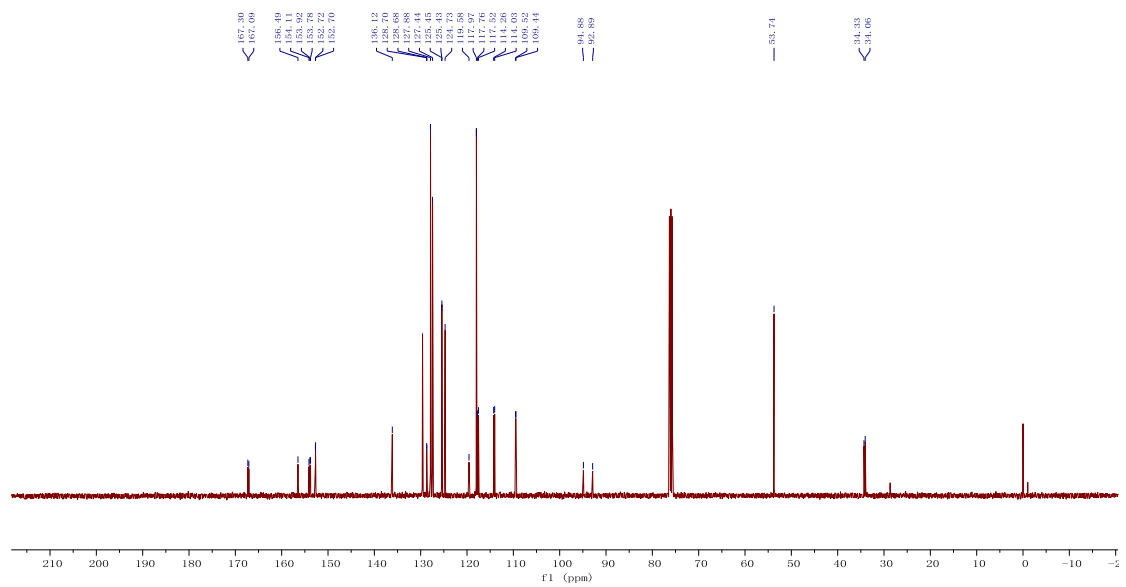







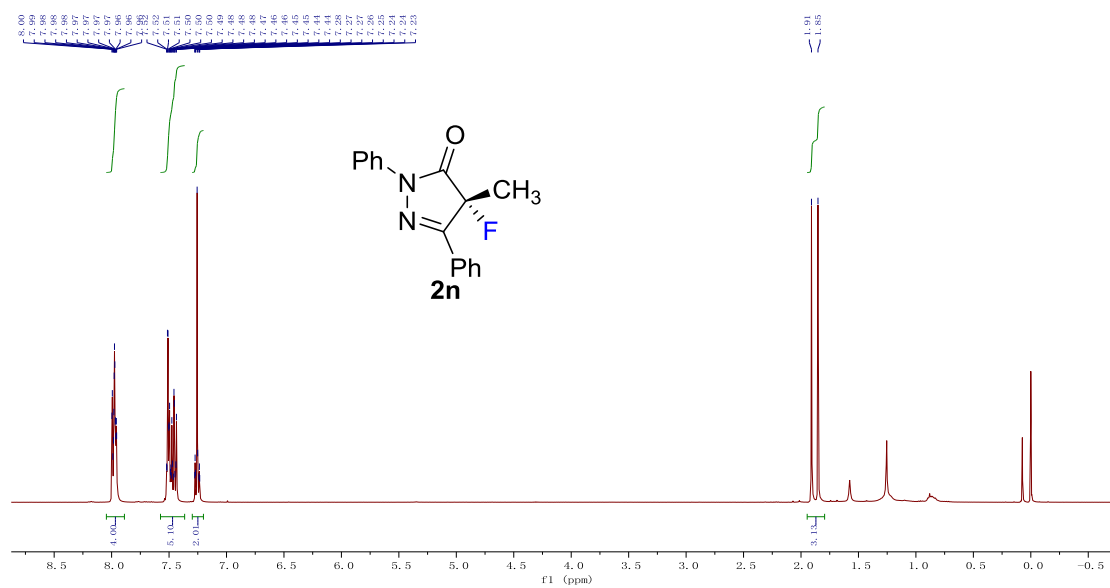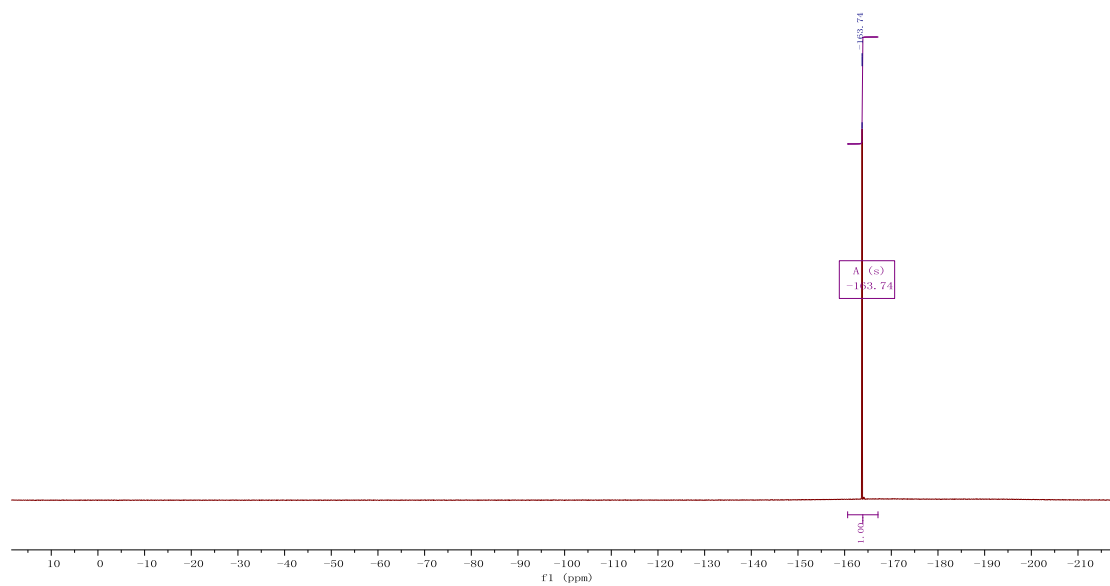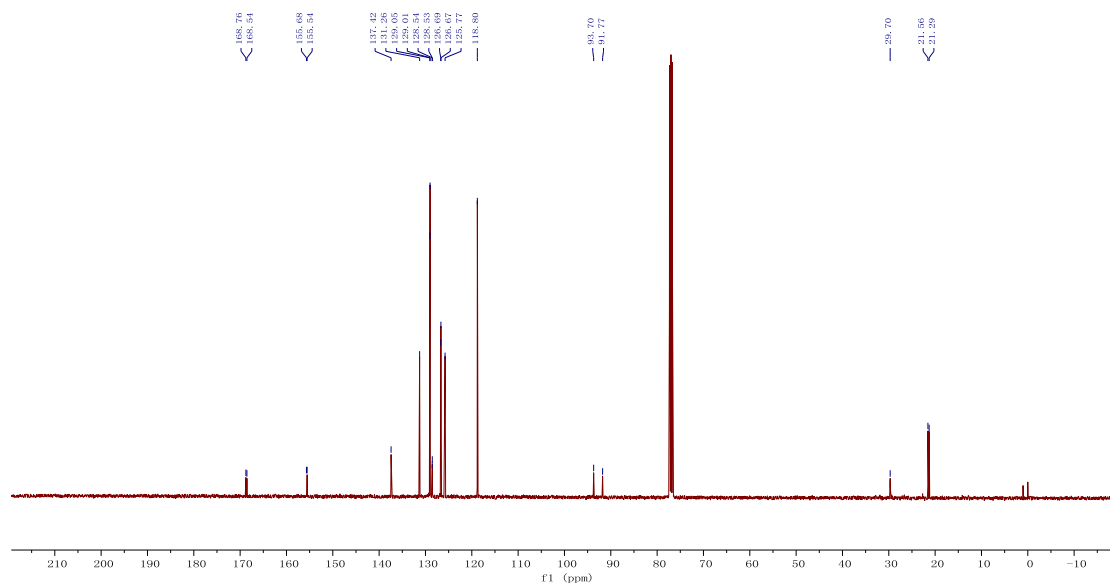

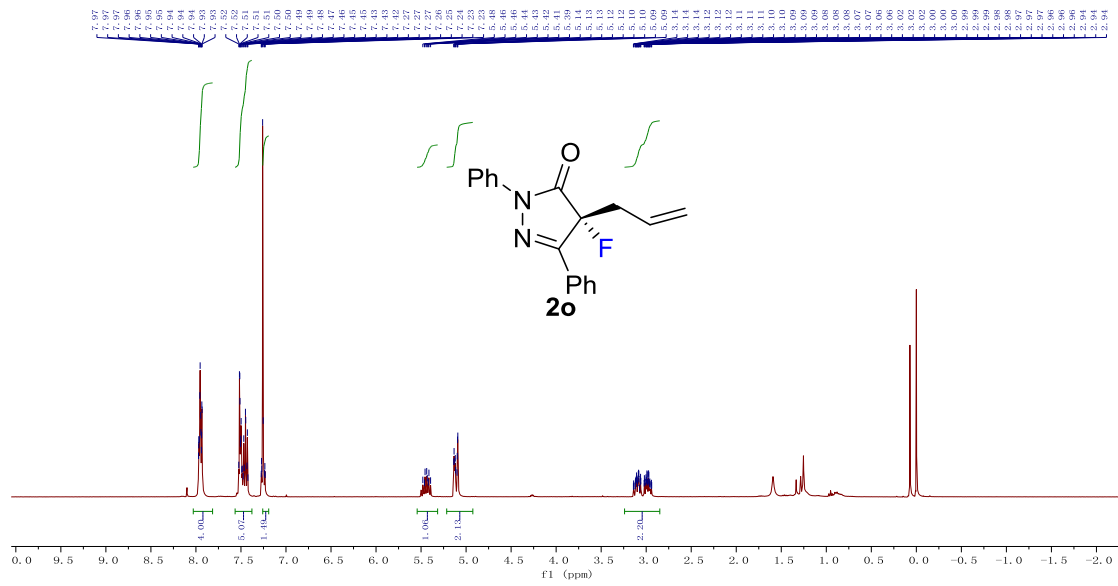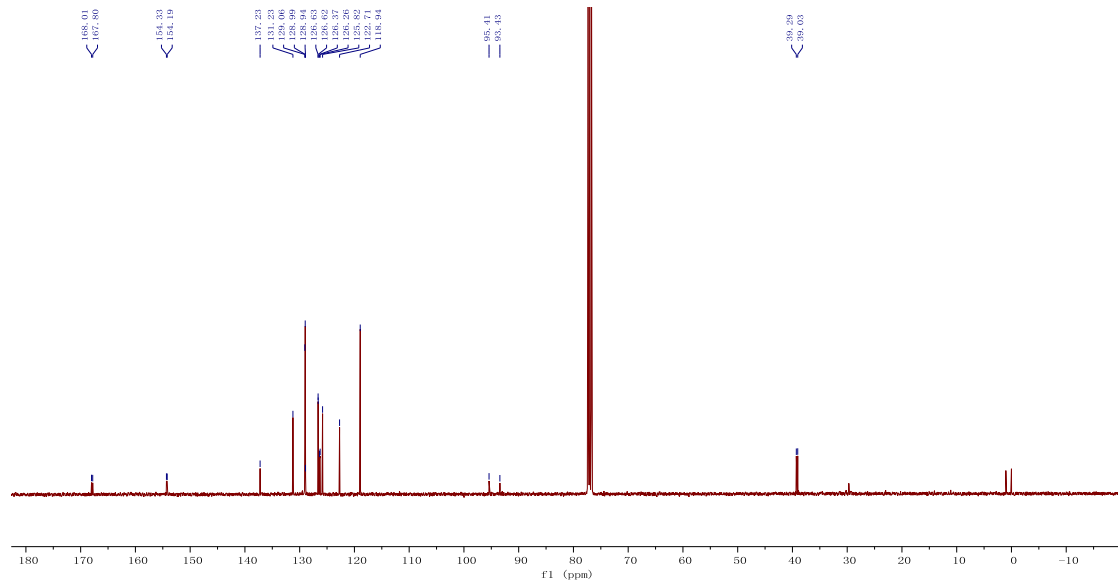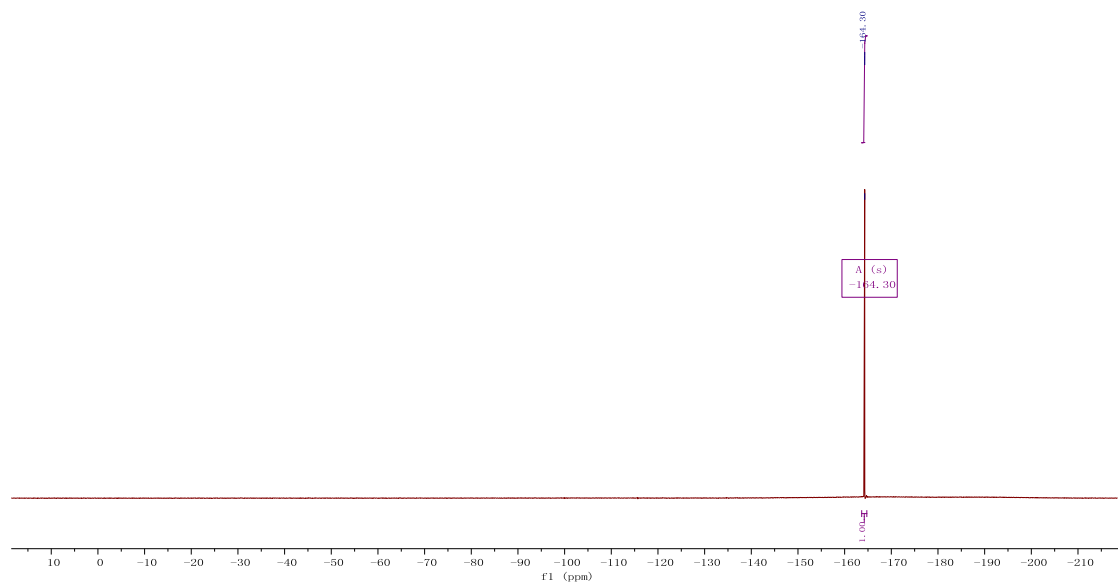

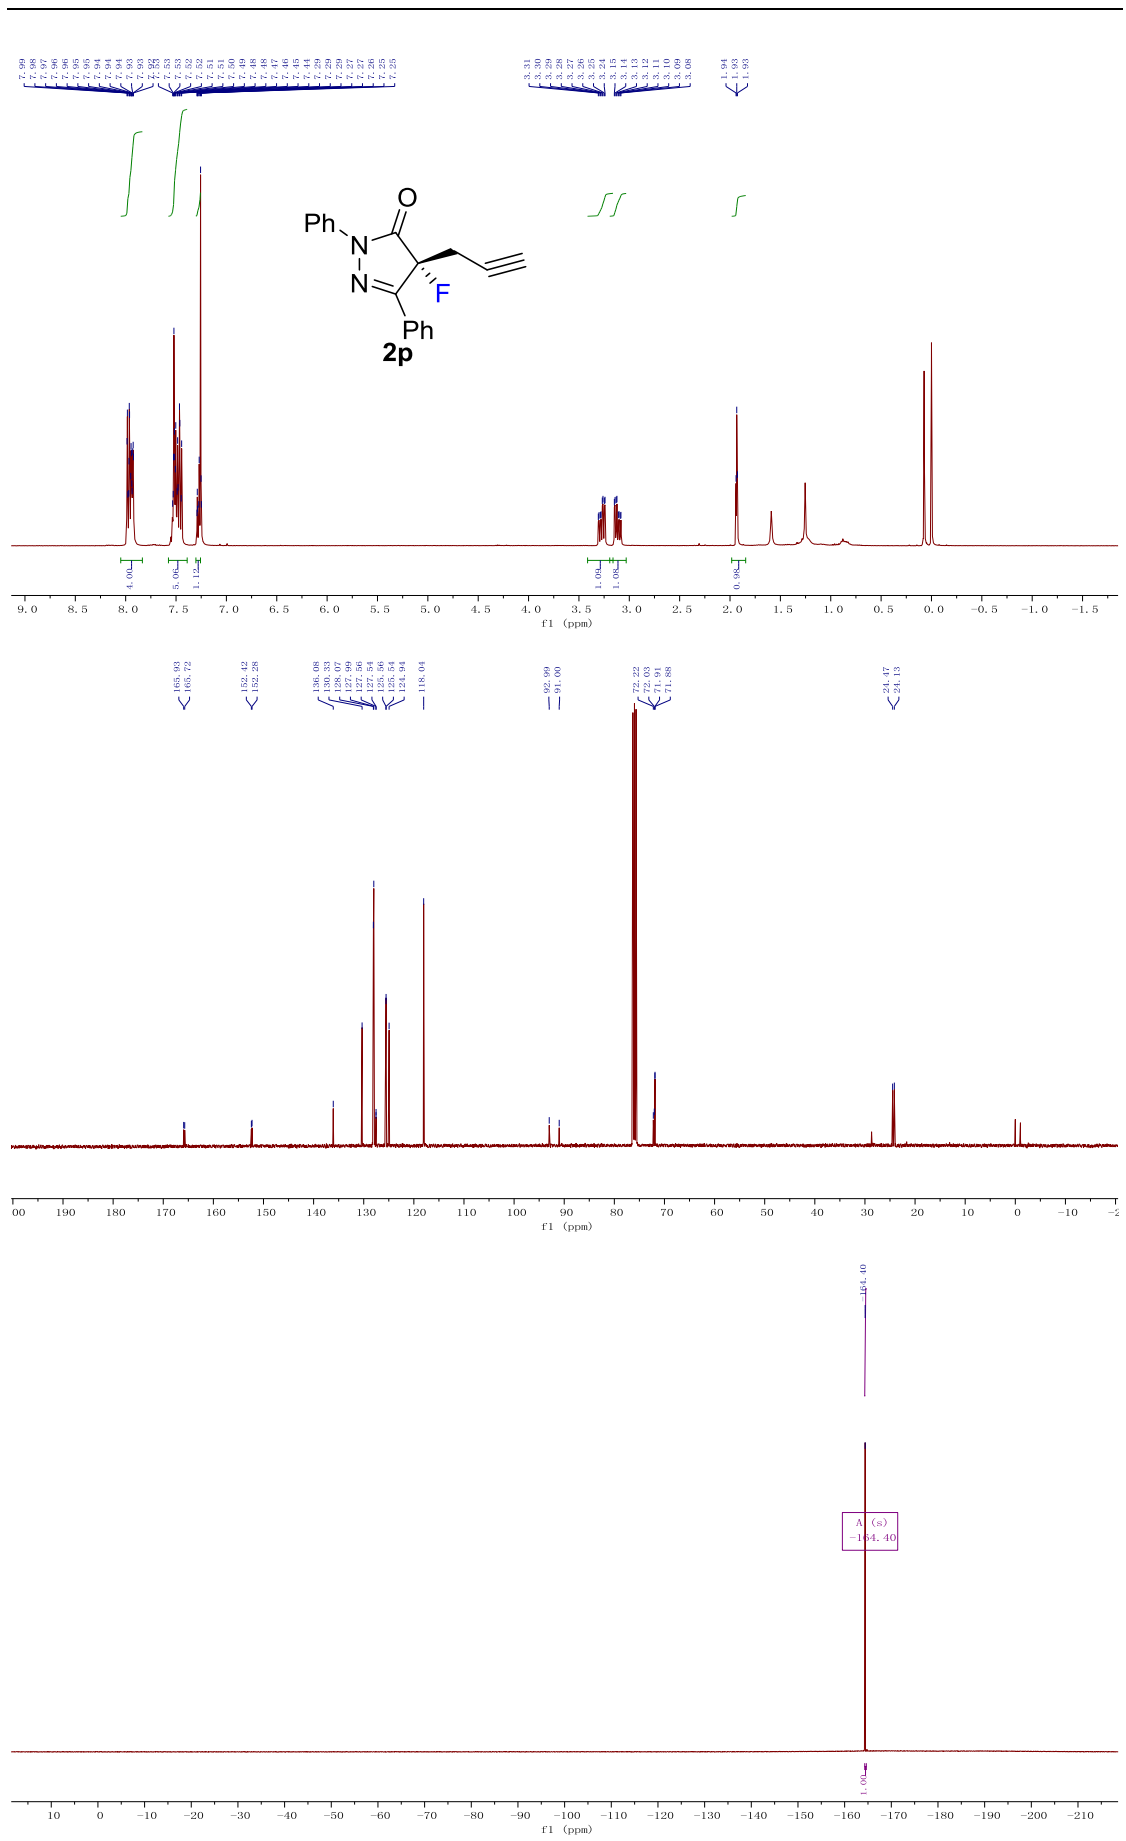

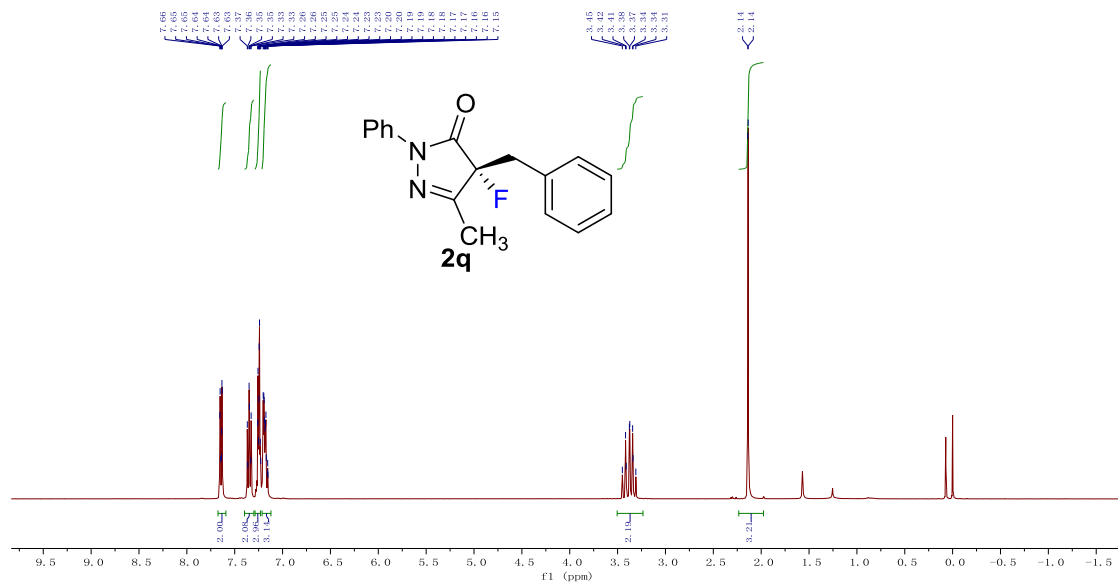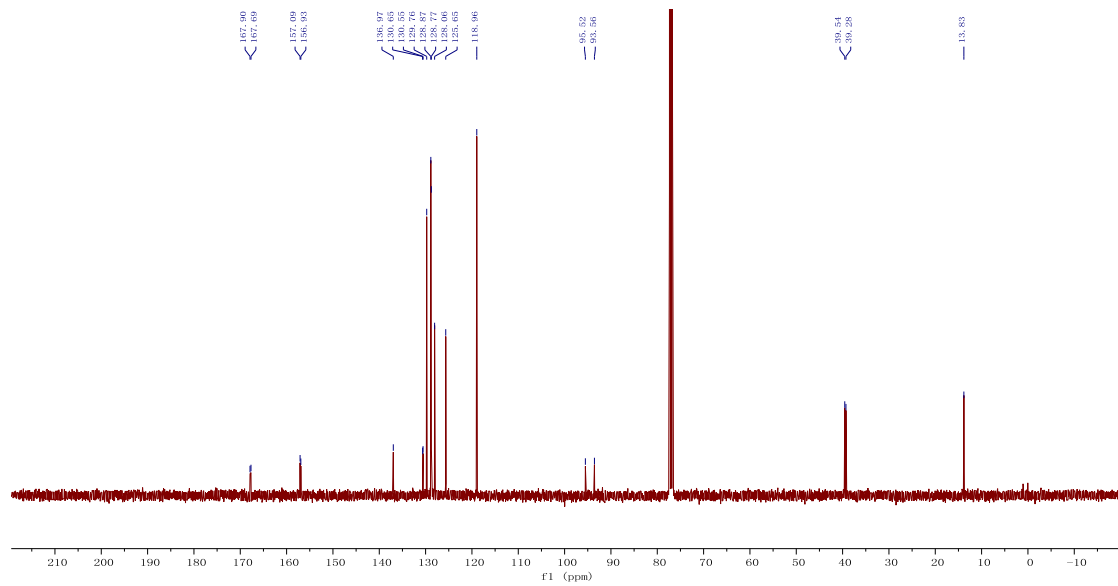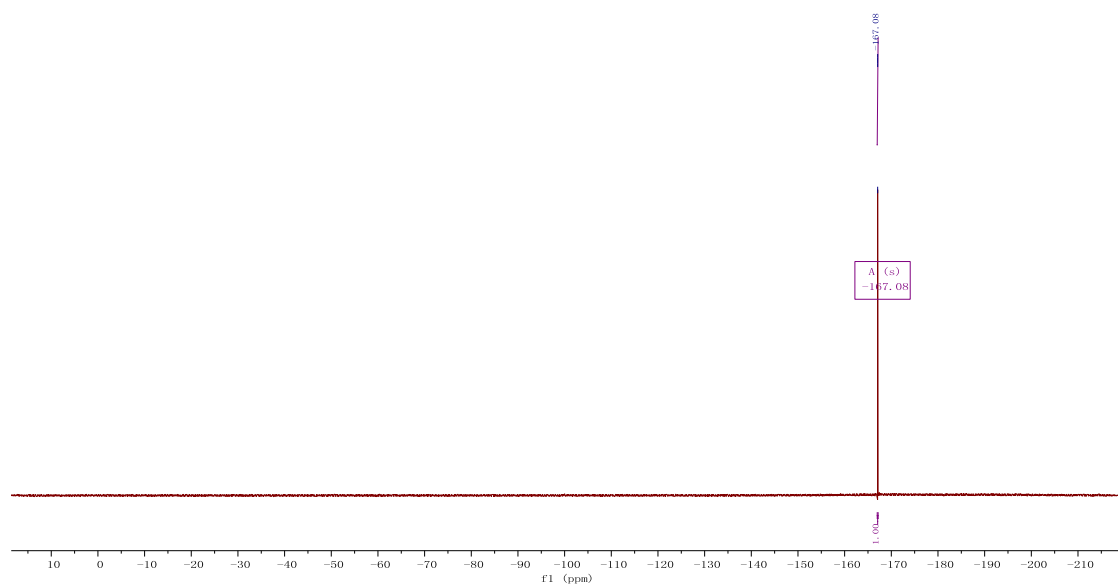



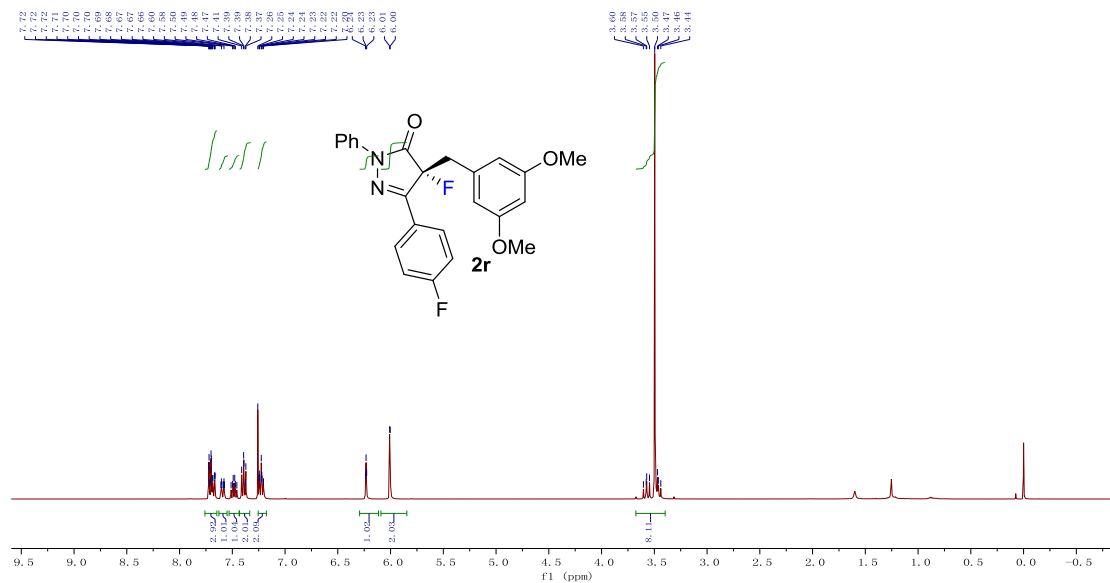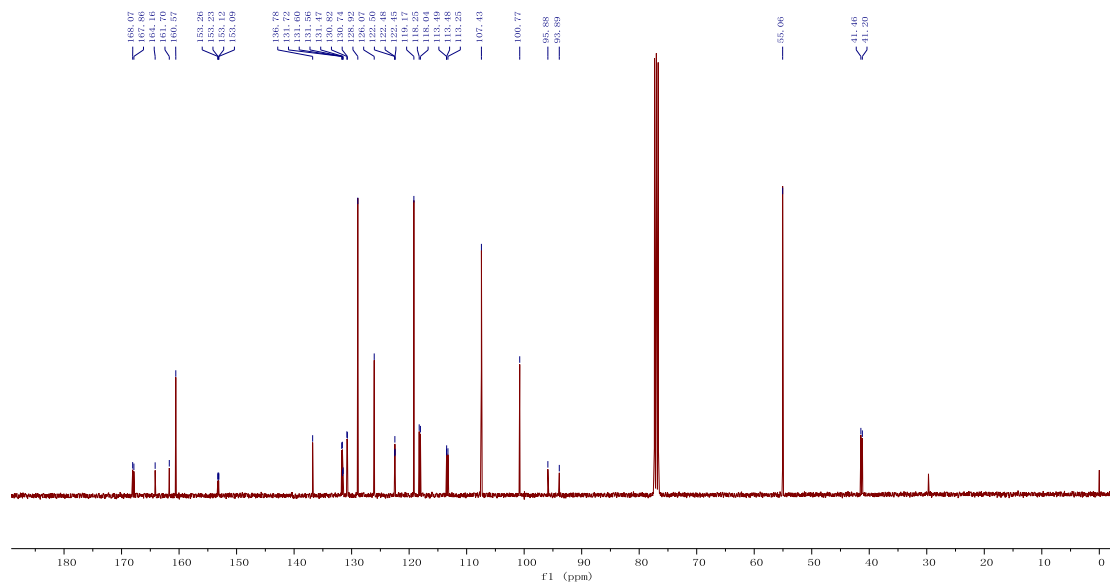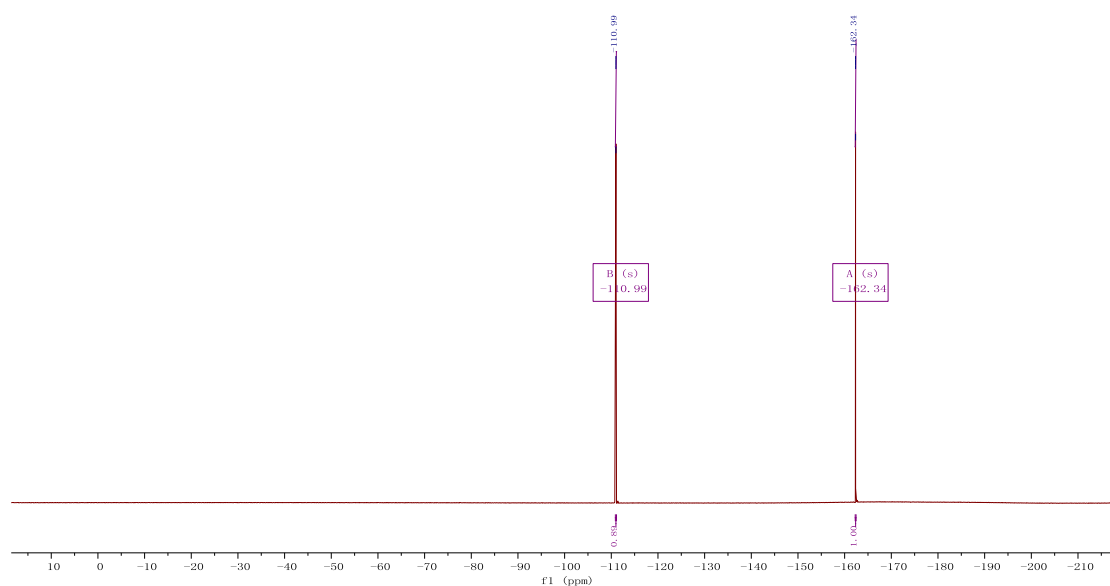



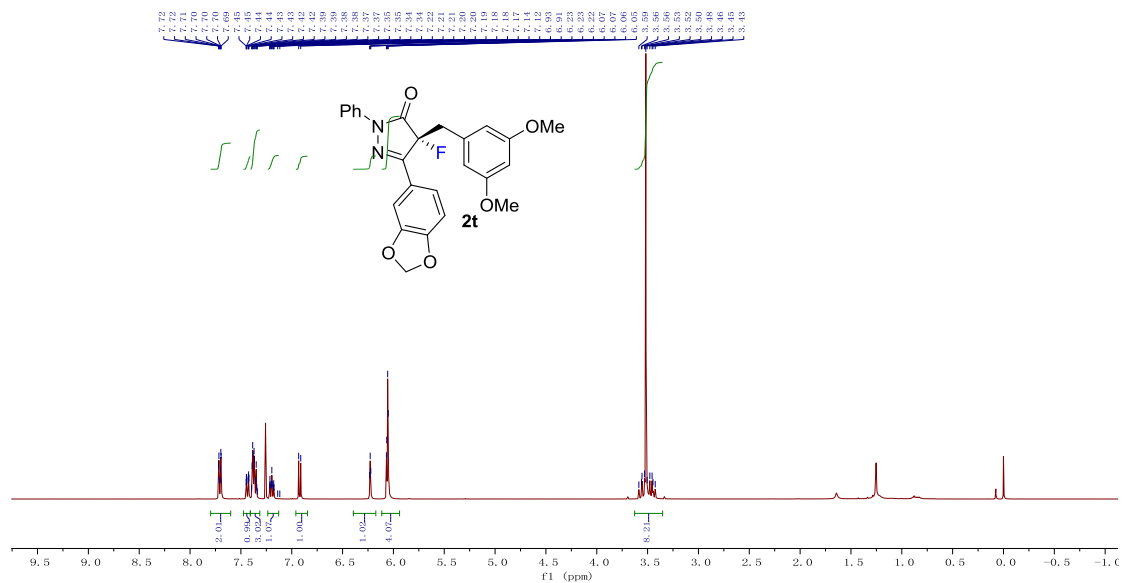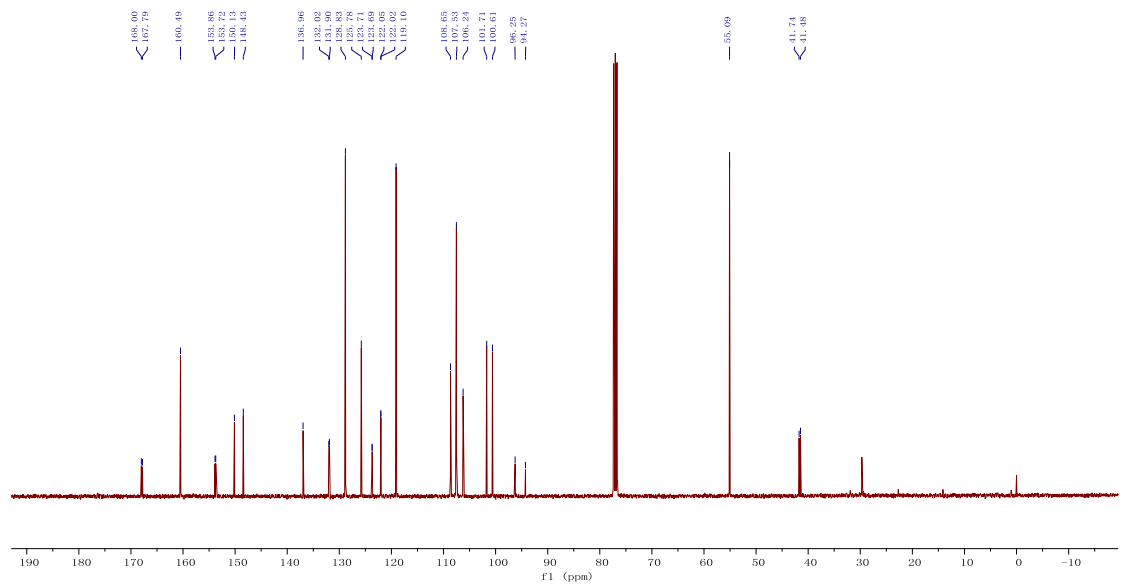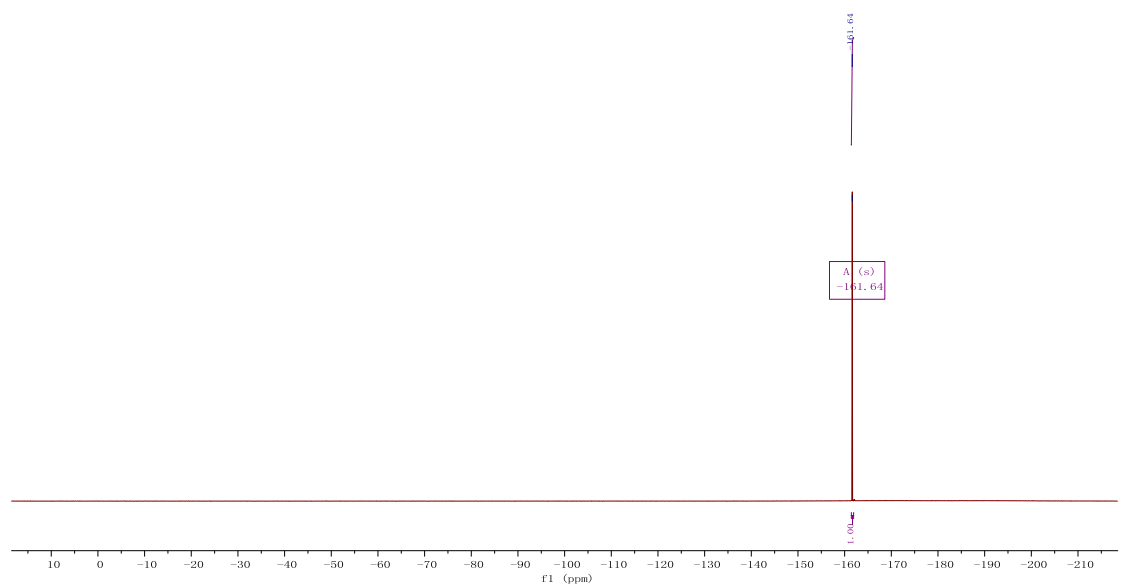

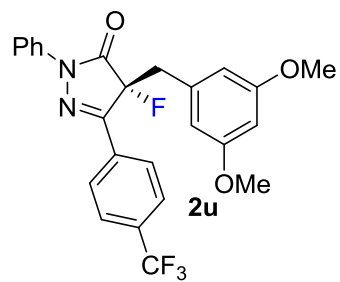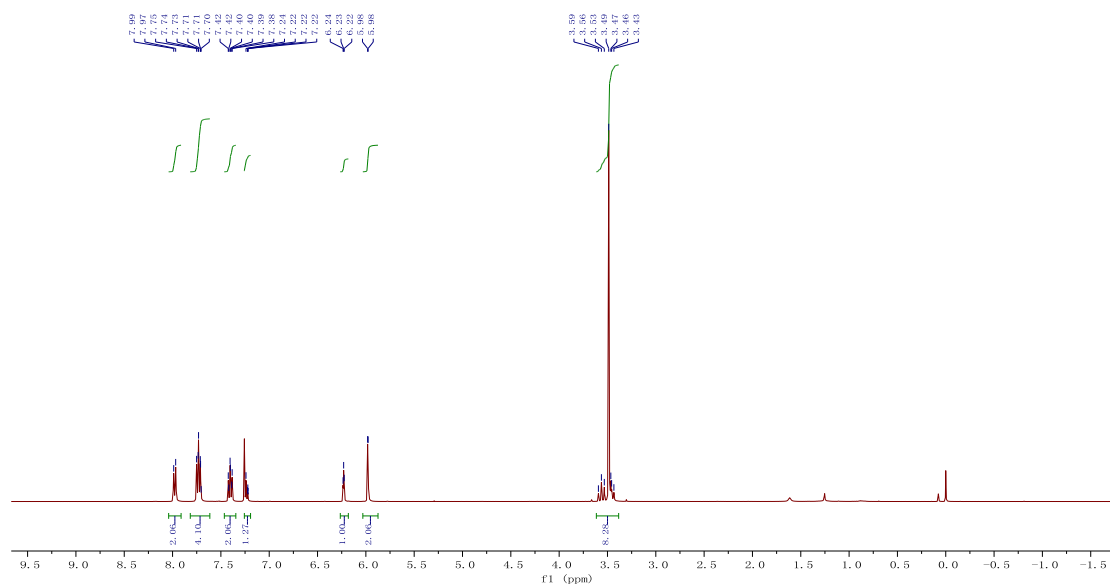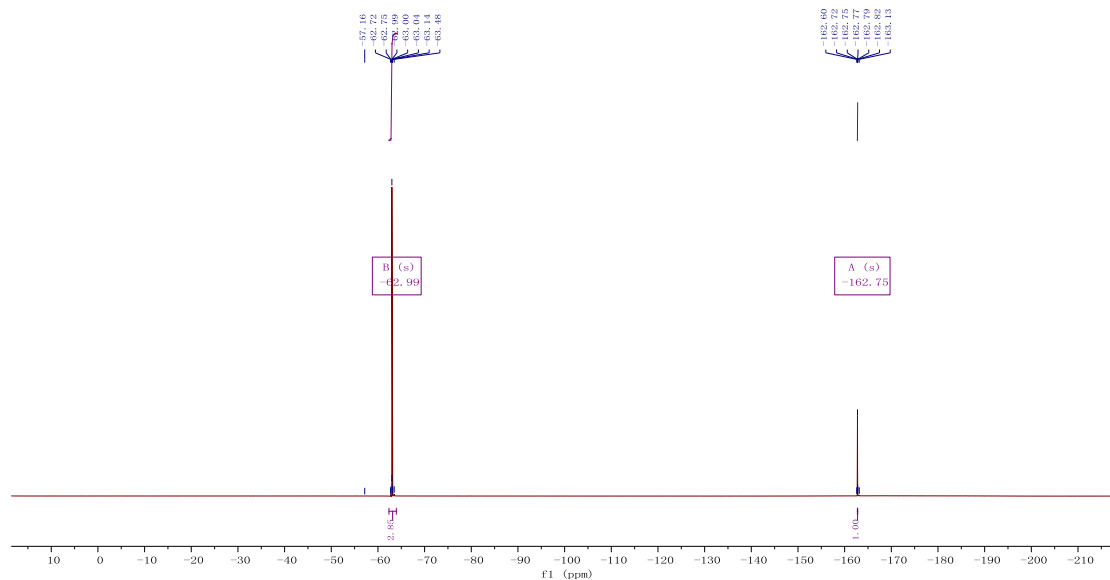

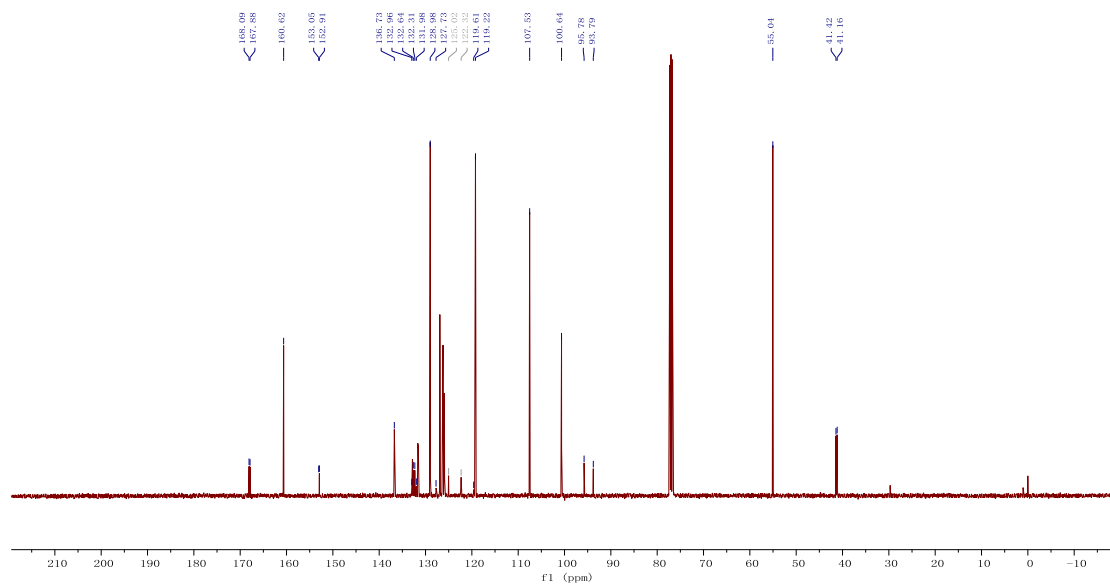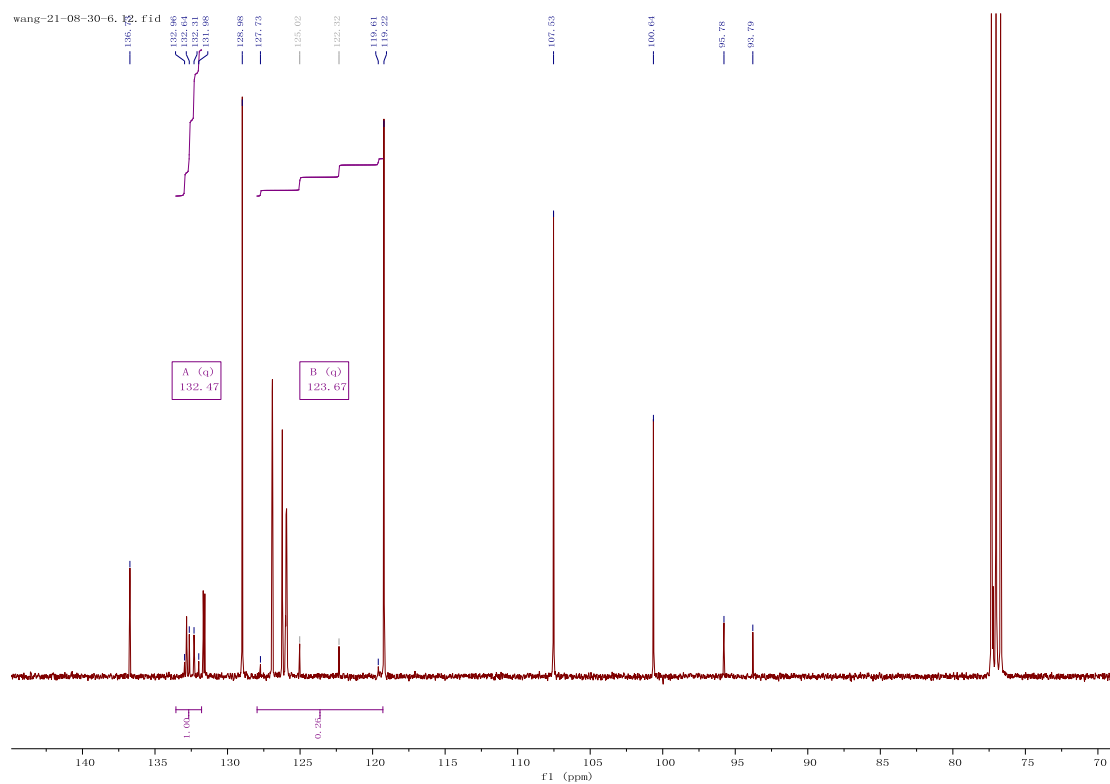





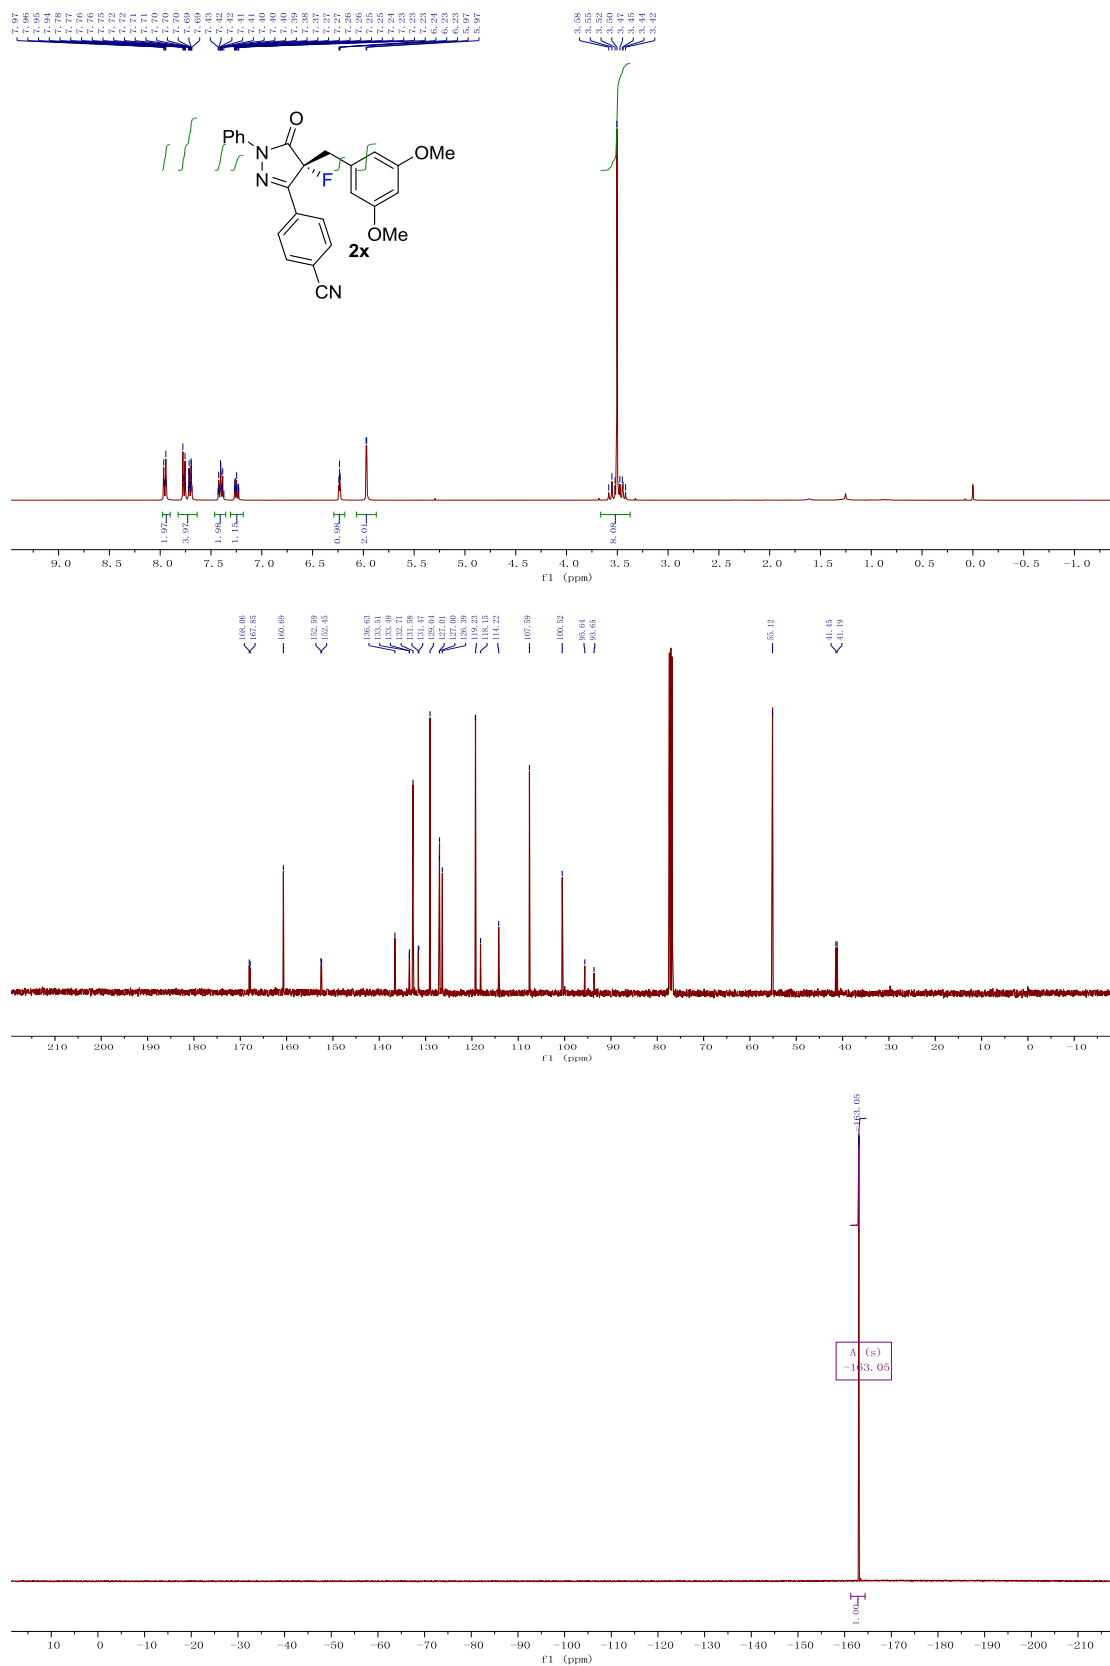



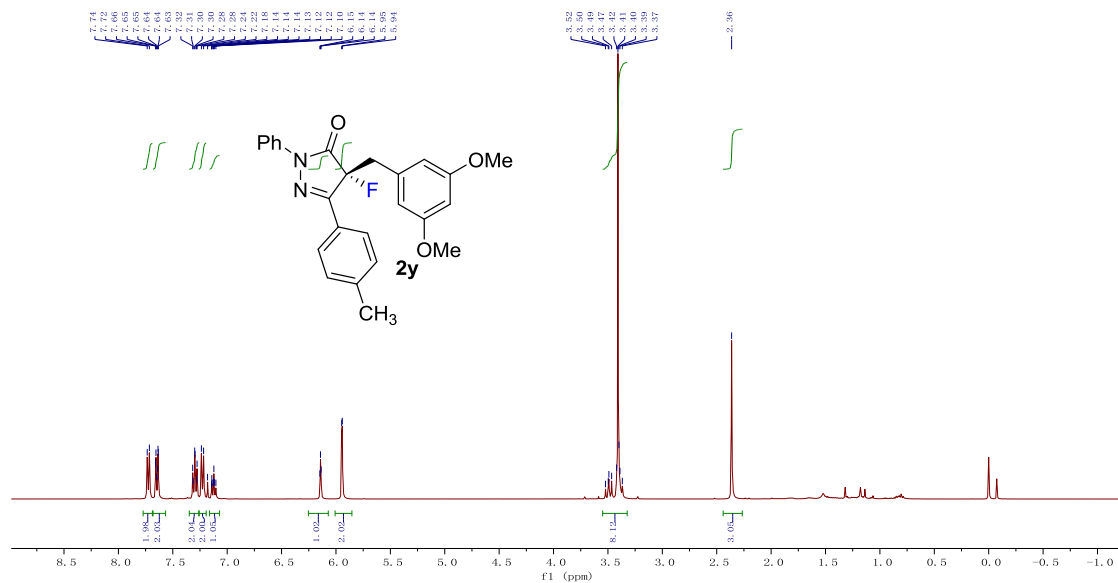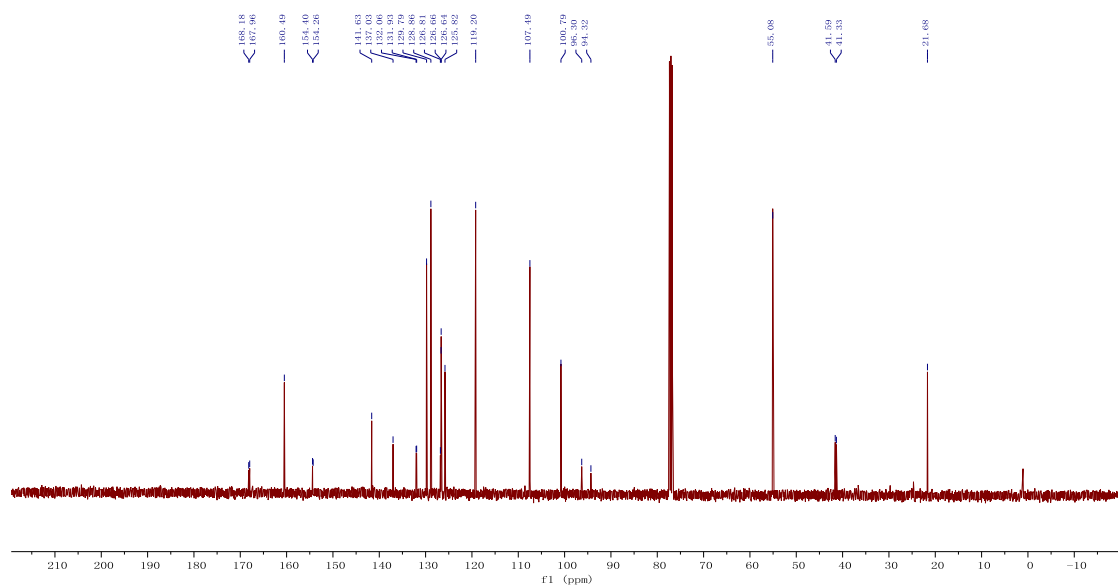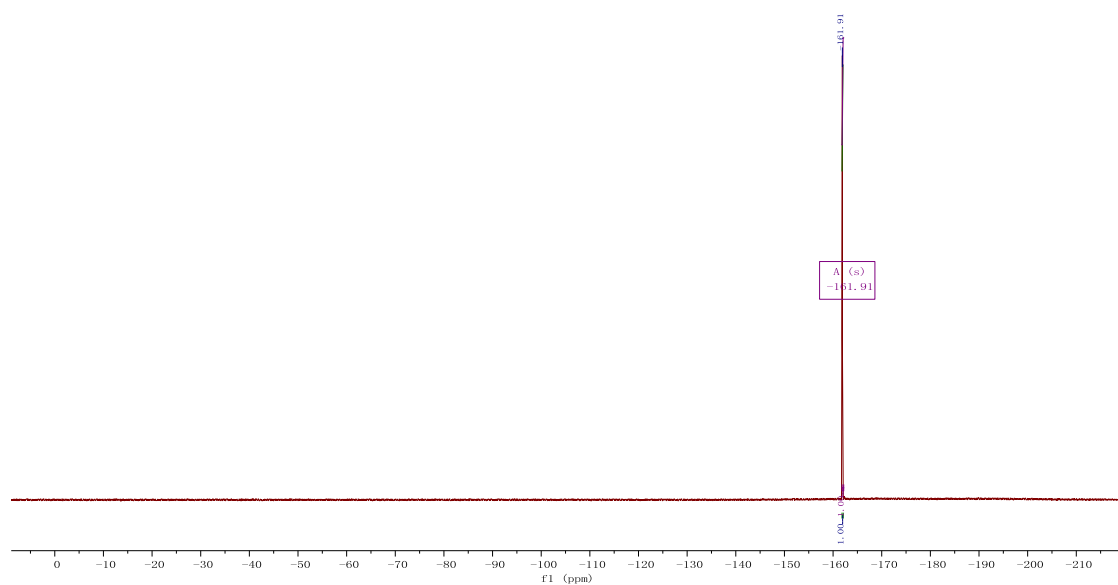

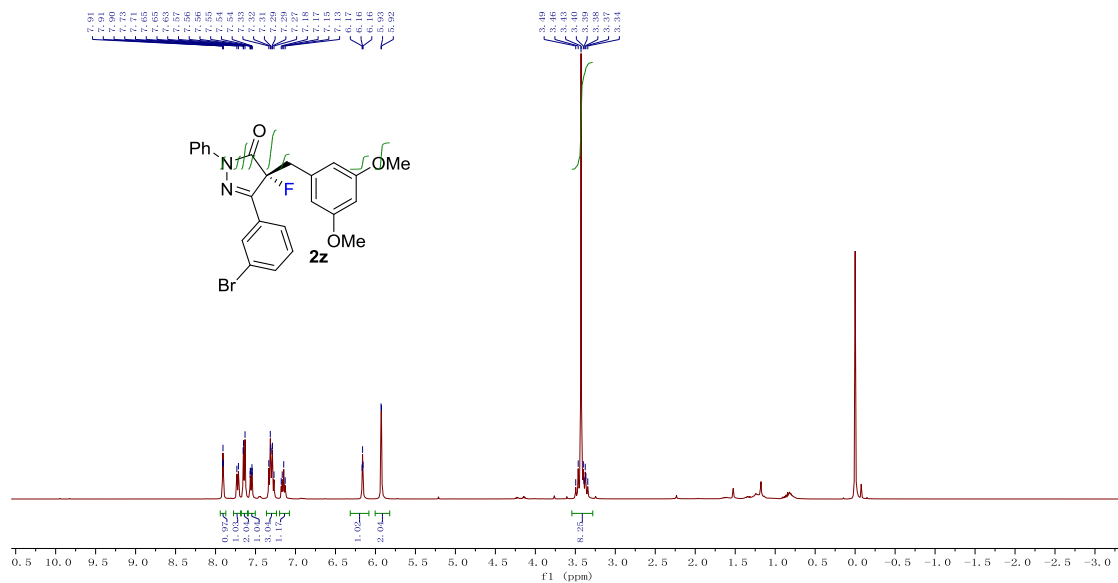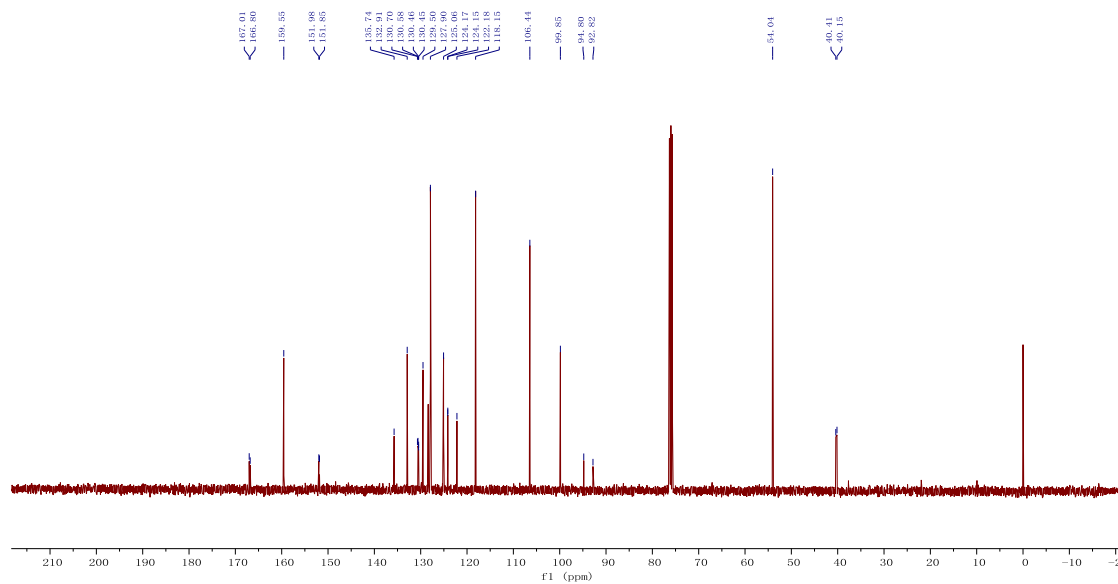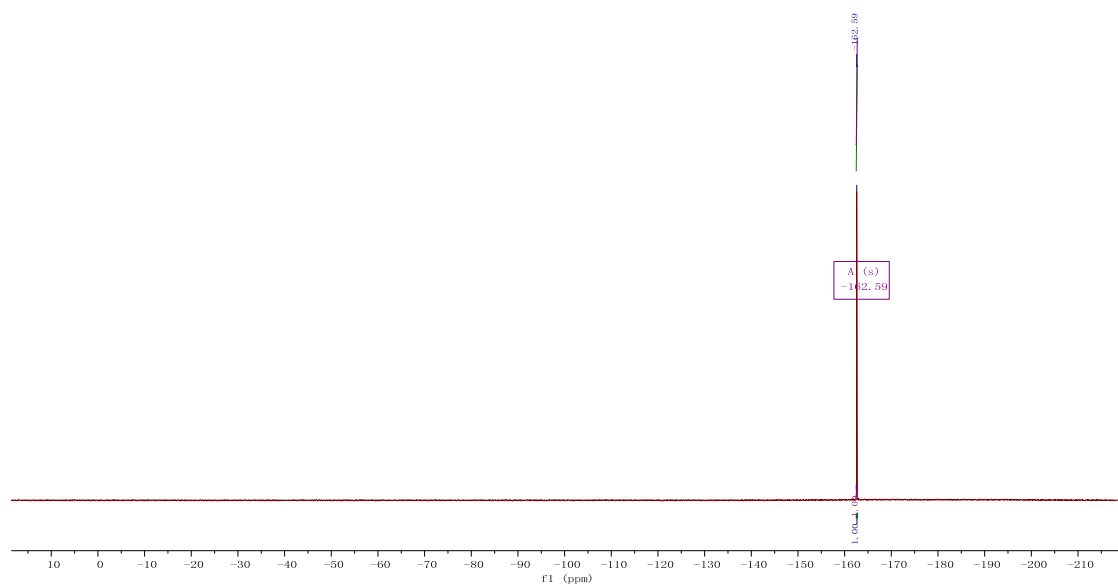



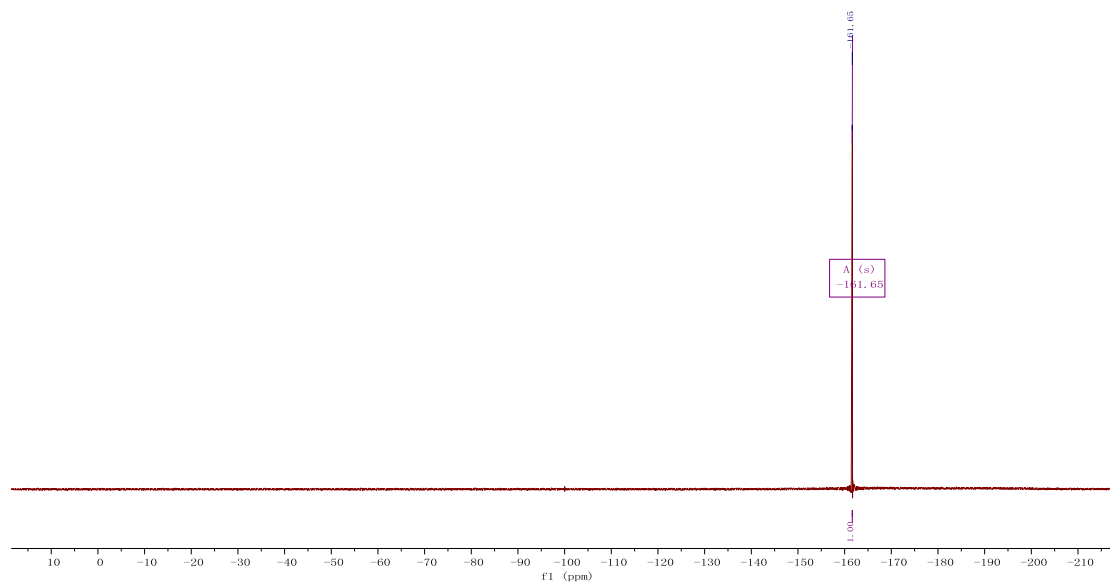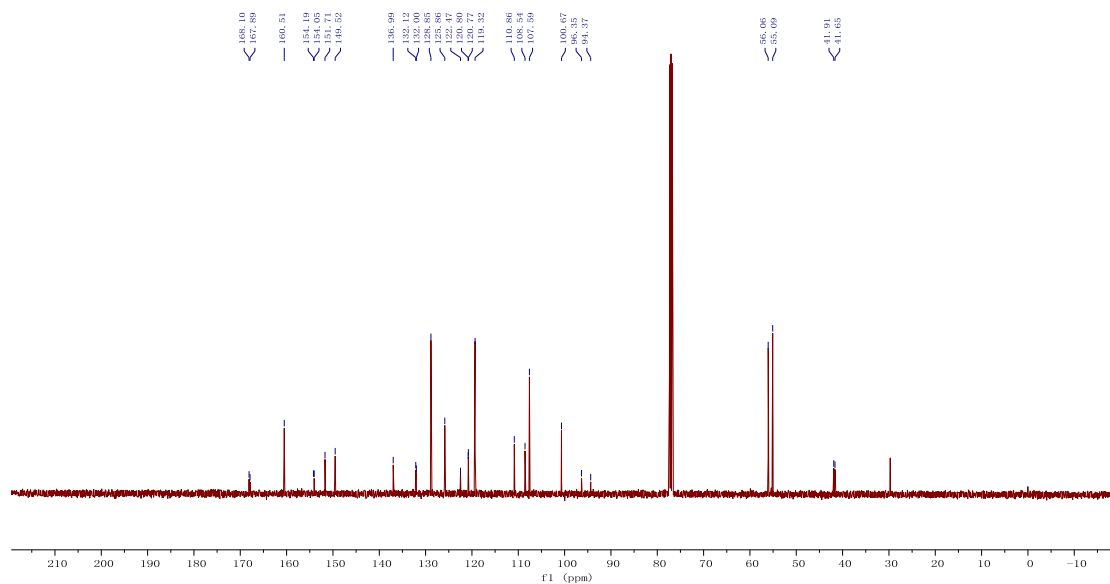

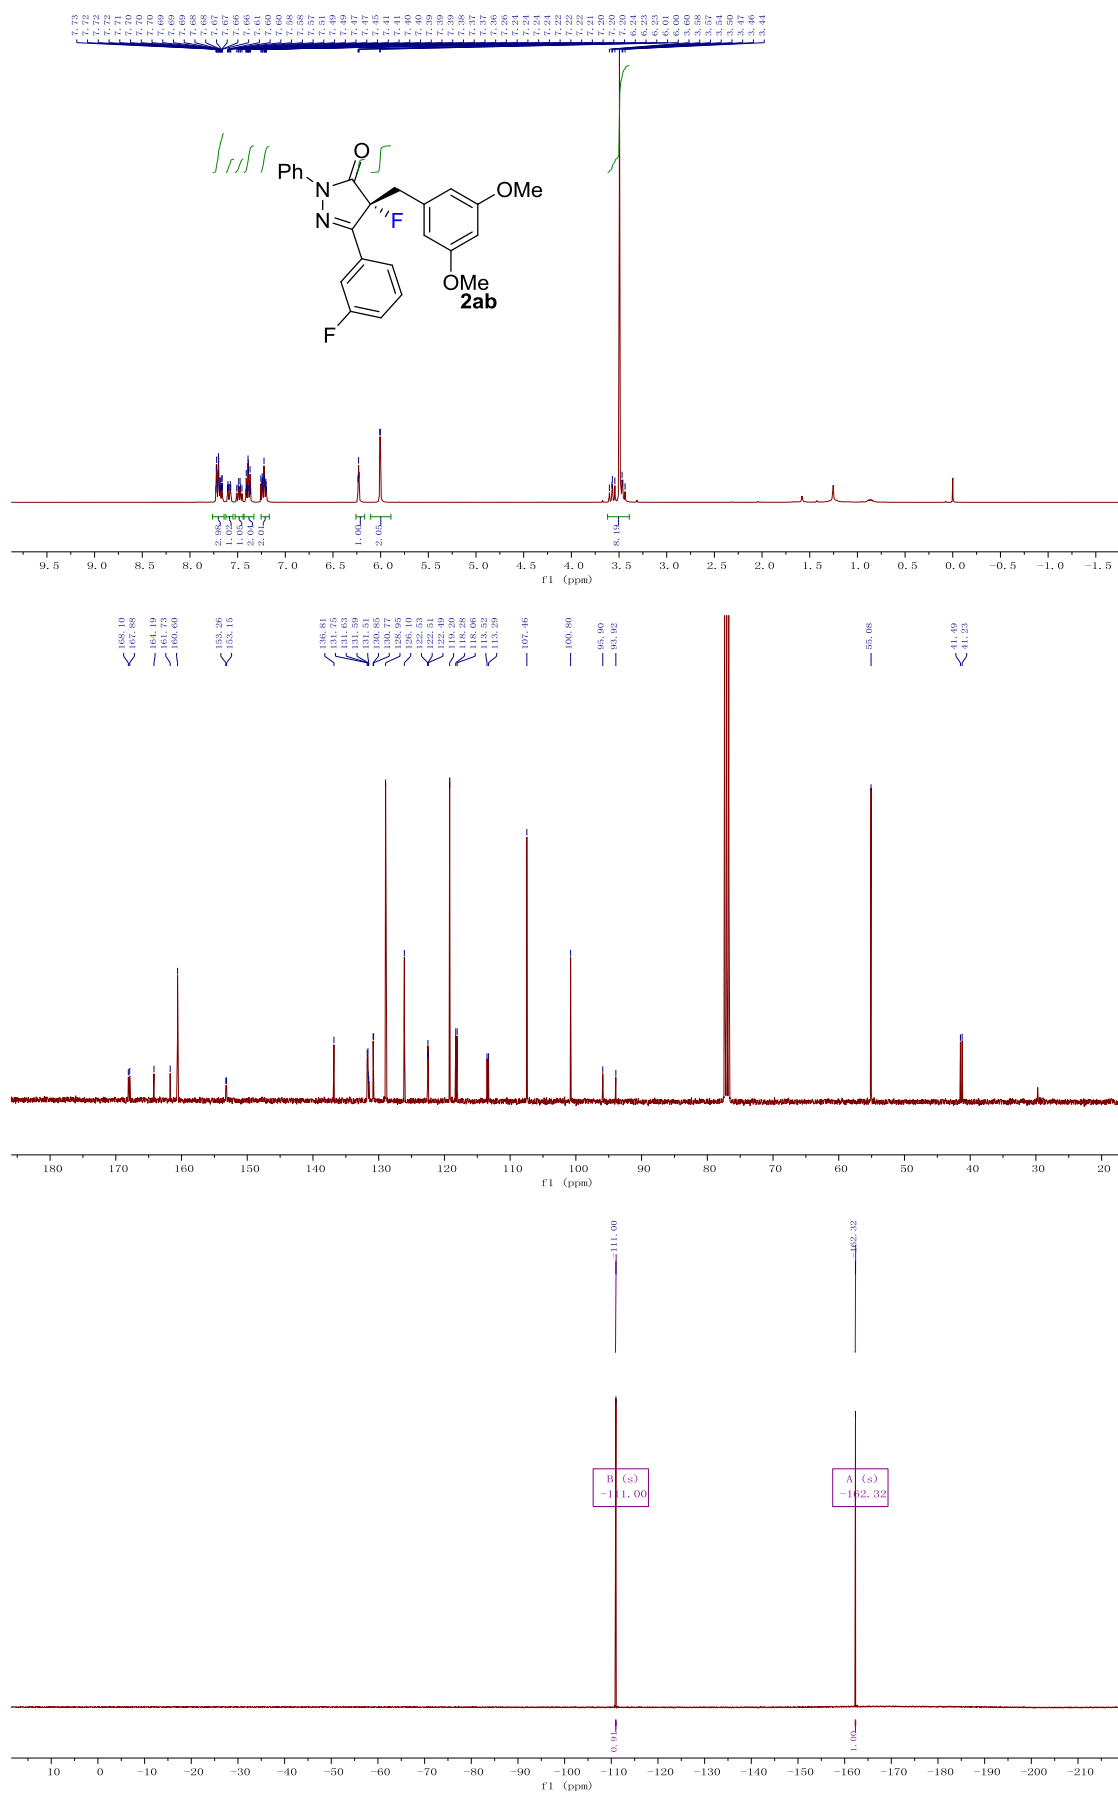



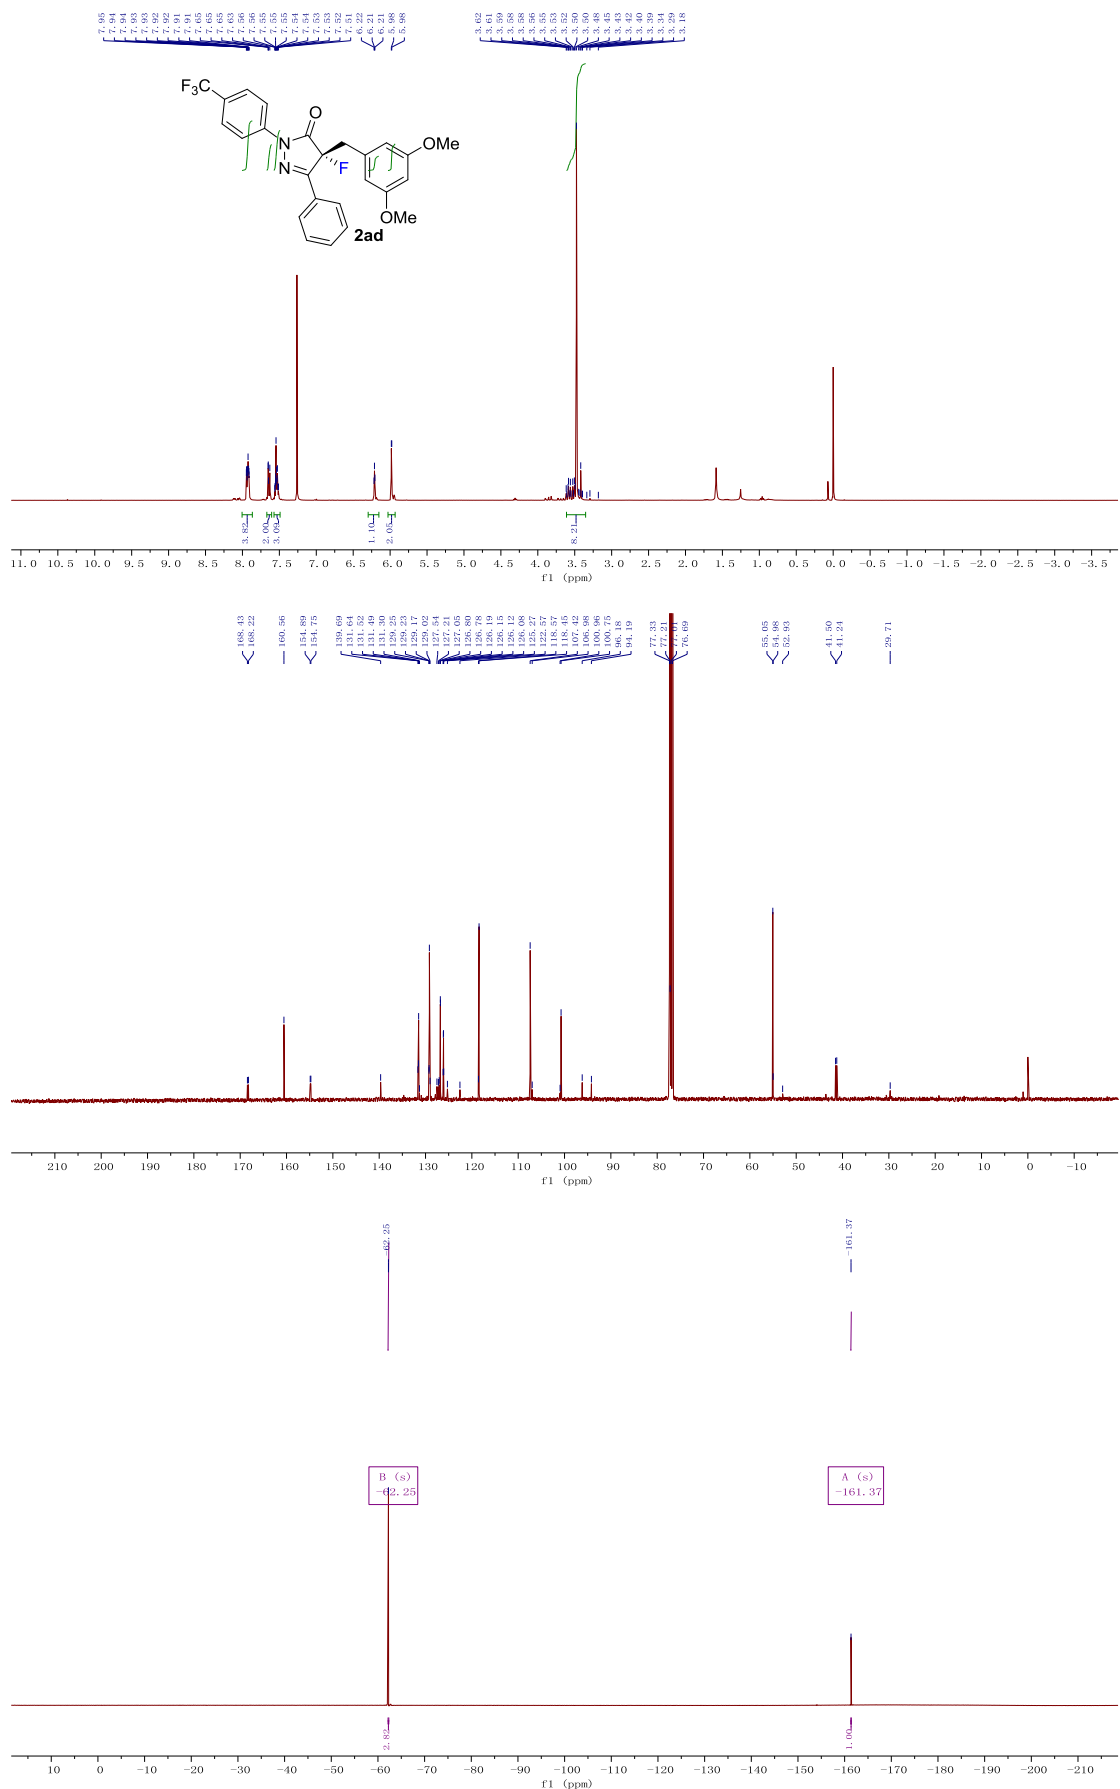





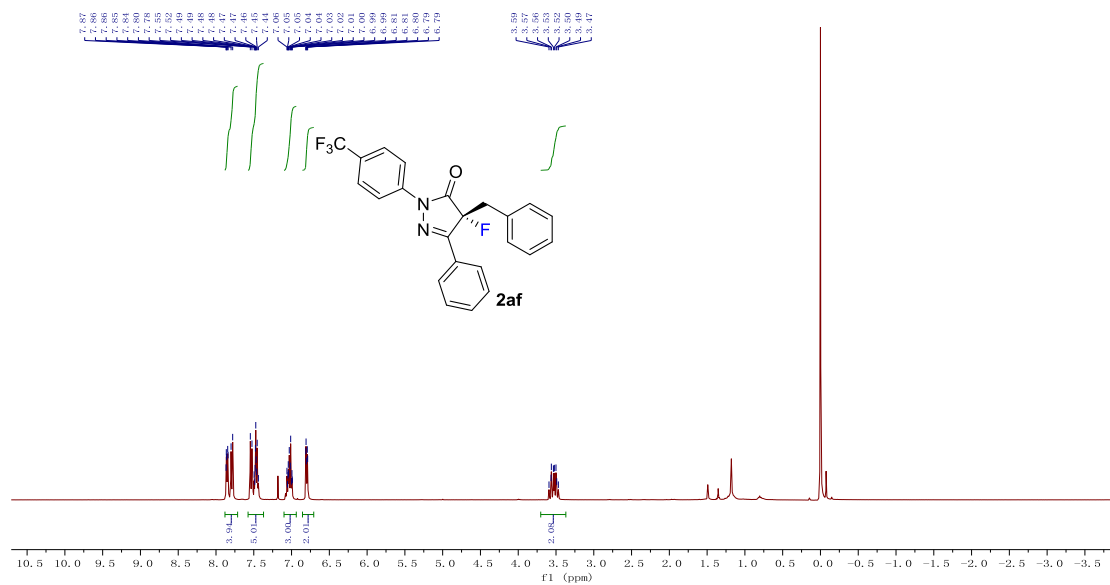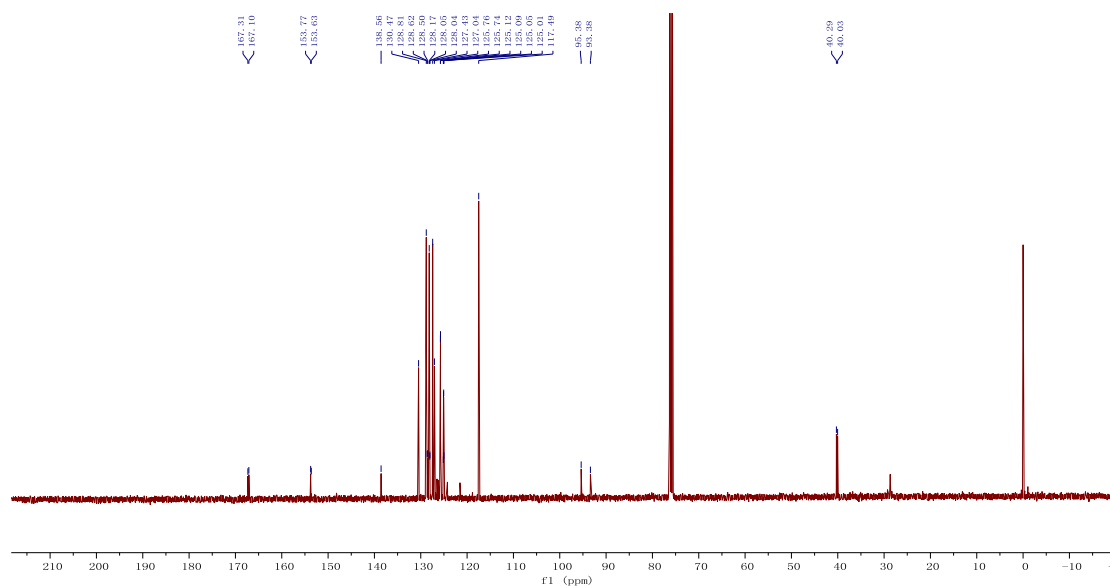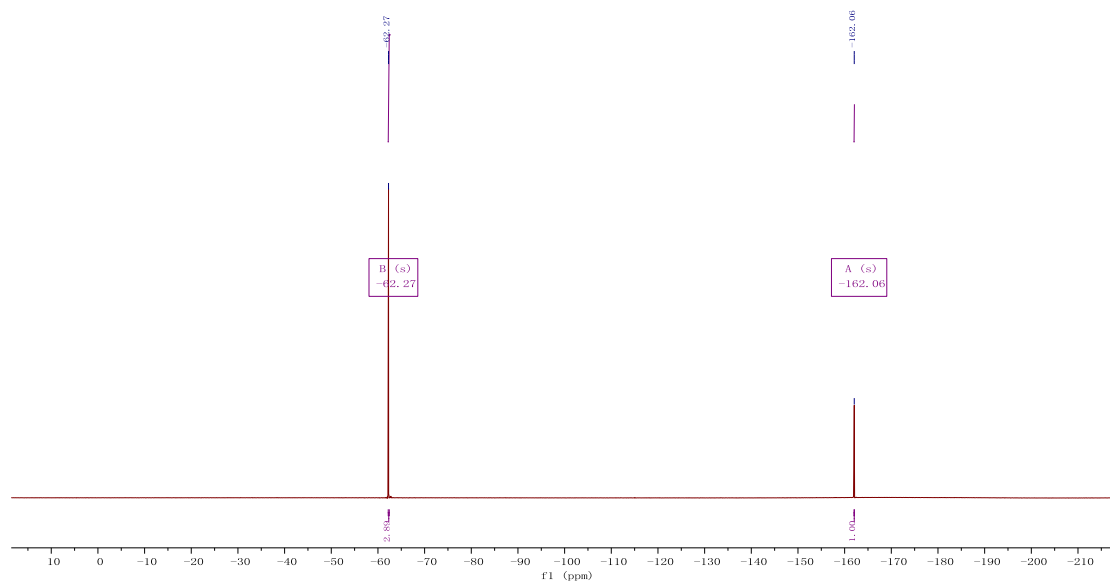





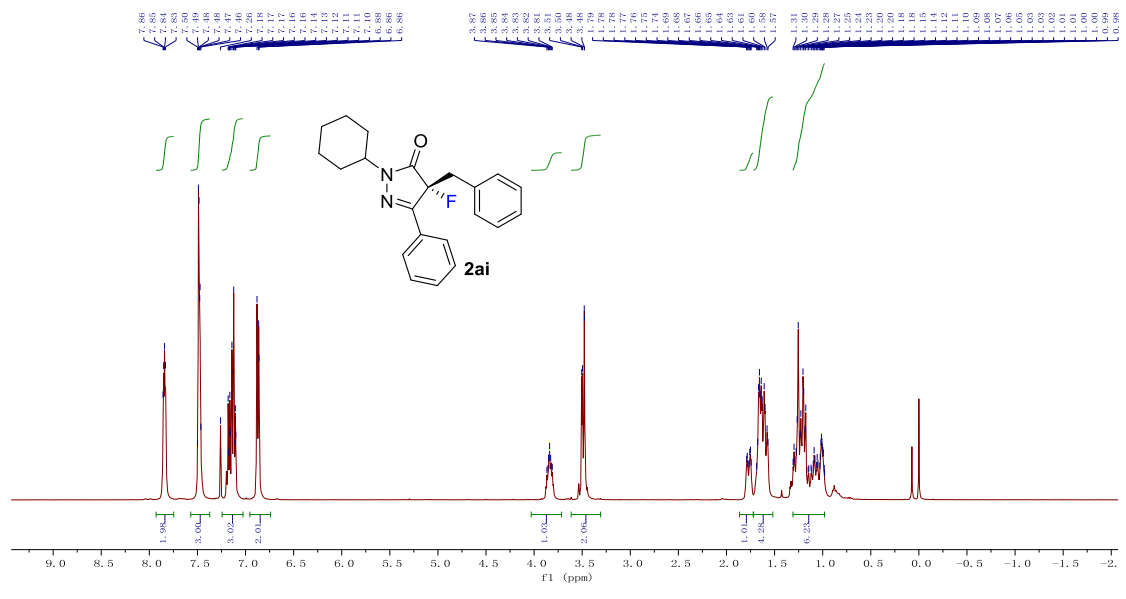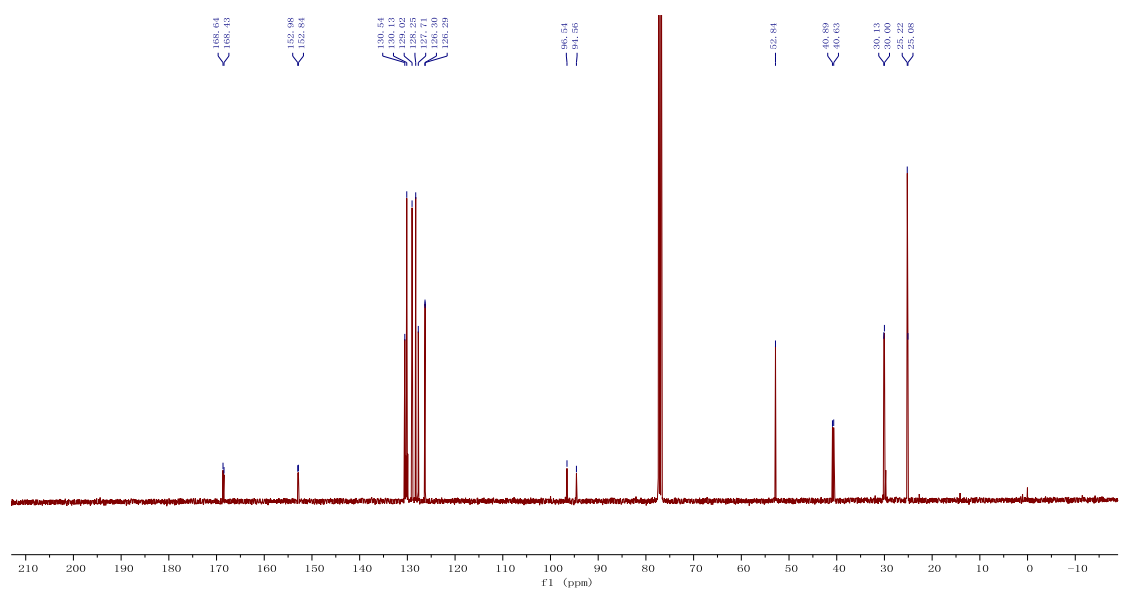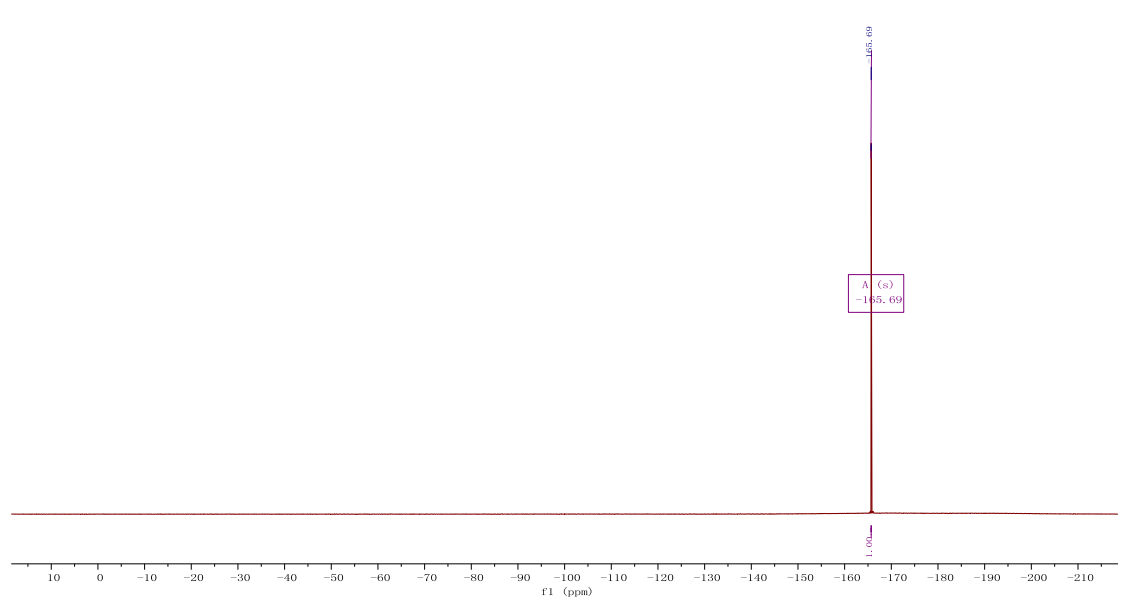

Supplement: d3qo00269a1.pdf [file d3qo00269a1.pdf]
